# Supplementary material for: Comparative electron microscopy particle sizing of TiO2 pigments: sample preparation and measurement
Source: publisher site journal article supplement (doi:10.3762/bjnano.15.29), 2024-03-25
Supplement: Additional file 1 [file sample E.xlsx]

## Sheet: Kronos
Min (Feret) (nm)	Mean (Feret) (nm)	ECD (nm)	Aspektratio	Fläche (nm²)
67.8218	75.3495	72.6469	1.20004	4144.99
96.6077	108.509	103.747	1.19727	8453.61
152.268	180.855	171.666	1.31239	23145.2
87.6919	95.094	92.5132	1.12951	6721.98
90.4672	96.0914	93.6787	1.12245	6892.42
120.107	148.834	135.974	1.34783	14521.1
59.0806	74.506	69.9689	1.46875	3845.03
49.6094	58.6452	56.2103	1.18013	2481.54
57.4424	63.6314	61.5189	1.13559	2972.4
127.178	137.109	131.198	1.12535	13519
96.6077	117.252	111.879	1.31581	9830.73
57.4424	67.3657	64.5485	1.13636	3272.36
121.34	151.168	140.957	1.43126	15605.1
95.9359	110.362	104.331	1.21861	8549.05
93.9967	112.471	107.729	1.23302	9114.9
116.315	126.797	121.261	1.1345	11548.7
67.8865	84.2914	78.5597	1.30769	4847.19
83.5526	106.875	98.3791	1.375	7601.43
170.59	180.194	170.372	1.06772	22797.5
101.83	108.575	104.871	1.12395	8637.68
70.4975	77.258	75.0564	1.07407	4424.51
156.933	165.02	161.962	1.12337	20602.3
57.4424	75.1254	70.7706	1.36364	3933.65
127.993	147.23	141.204	1.27195	15659.6
123.7	154.474	145.562	1.35821	16641.3
67.8865	73.464	70.9544	1.13674	3954.11
170.777	186.908	175.121	1.16211	24086
174.894	213.587	199.866	1.37768	31373.8
80.9416	84.927	81.1148	1.04207	5167.61
122.62	133.176	127.269	1.14042	12721.3
46.9984	55.3535	52.9501	1.23593	2202.03
92.2559	98.942	95.4685	1.08622	7158.3
68.312	79.2402	75.7471	1.27027	4506.32
126.405	152.782	146.484	1.34932	16852.7
77.5433	96.2301	90.6651	1.40476	6456.1
185.718	203.995	195.475	1.09156	30010.3
91.3857	101.001	96.8675	1.17647	7369.64
33.9433	38.9279	36.916	1	1070.34
139.532	146.802	142.641	1.05782	15980
139.321	168.852	158.796	1.34514	19804.6
101.181	129.561	122.649	1.51702	11814.6
62.6645	72.6227	69.5957	1.17331	3804.12
168.884	207.931	198.733	1.37119	31019.3
91.3857	96.9733	94.233	1.05714	6974.23
145.193	172.662	164.541	1.25054	21263.5
117.825	161.377	150.257	1.58308	17732.1
138.104	153.563	149.214	1.17007	17486.7
103.391	133	125.517	1.35714	12373.6
124.342	149.281	140.464	1.28331	15496
79.619	93.8619	89.8959	1.31007	6347.02
179.175	199.523	190.094	1.16416	28380.9
82.6507	98.755	94.3251	1.33521	6987.86
162.421	184.182	176.282	1.20154	24406.4
86.1637	92.7389	89.4604	1.05202	6285.67
122.641	131.438	126.756	1.12766	12619.1
77.5433	88.8456	85.1351	1.27653	5692.55
136.73	159.232	150.978	1.22515	17902.6
57.4424	63.7492	61.3069	1.09335	2951.95
91.3857	100.074	97.1806	1.0871	7417.36
143.606	164.908	152.551	1.30909	18277.5
183.83	224.644	211.431	1.31009	35109.7
97.2543	120.26	111.529	1.41103	9769.37
101.545	122.926	116.962	1.22016	10744.3
97.8523	124.944	117.554	1.37736	10853.3
112.274	129.52	124.998	1.18605	12271.4
90.4672	106.334	99.6938	1.22658	7805.95
62.6645	77.9926	74.1254	1.29167	4315.43
46.9984	52.6287	49.999	1.14815	1963.42
52.2204	58.5111	56.2103	1.06452	2481.54
88.621	104.302	99.6067	1.20833	7792.32
118.428	155.945	143.823	1.51191	16245.9
84.9284	97.427	93.9101	1.21739	6926.5
99.2188	106.515	102.357	1.0718	8228.63
131.085	141.371	136.42	1.04457	14616.6
106.664	119.887	114.183	1.1959	10239.8
146.217	171.953	163.562	1.30086	21011.3
168.169	183.754	175.813	1.09306	24276.9
124.922	133.042	129.332	1.11765	13137.2
88.7747	97.7808	94.0486	1.14729	6946.96
82.6977	100.596	96.2833	1.3426	7281.01
80.8811	93.37	89.4118	1.19205	6278.85
36.5543	43.4276	41.1417	1.07143	1329.4
99.2188	115.686	111.801	1.25545	9817.09
44.3873	50.4797	48.3216	1.05882	1833.89
75.7196	91.4901	84.7263	1.24138	5638.01
103.391	122.634	116.254	1.30379	10614.7
49.6094	69.7294	65.0174	1.52632	3320.09
67.8865	74.2851	71.4421	1.08053	4008.65
153.846	169.36	163.243	1.12841	20929.5
86.1637	96.1237	92.7475	1.1982	6756.07
129.239	159.647	149.707	1.34286	17602.6
148.828	179.215	167.339	1.2942	21993
104.441	124.581	119.167	1.27611	11153.3
137.514	155.692	147.223	1.17692	17023.1
67.8865	75.0833	72.5273	1.07692	4131.36
125.546	147.151	141.664	1.3288	15761.9
159.272	209.087	196.184	1.47541	30228.5
134.822	145.388	140.278	1.12317	15455.1
113.915	133.33	128.118	1.25595	12891.8
83.5526	90.1065	87.3494	1.09659	5992.52
160.079	176.317	169.683	1.17581	22613.4
118.612	158.882	146.306	1.47304	16811.8
80.9416	94.7299	88.9251	1.30352	6210.67
70.021	76.2489	73.2419	1.17653	4213.17
110.837	158.704	146.365	1.70912	16825.4
121.854	134.808	126.585	1.22252	12585
70.1583	80.7079	75.8616	1.26316	4519.95
133.324	146.788	140.433	1.10733	15489.2
149.011	168.151	157.973	1.20375	19600.1
79.47	90.9203	86.8511	1.27615	5924.34
125.741	149.619	142.397	1.31114	15925.5
93.9967	98.5734	95.3775	1.05615	7144.66
64.5685	74.3142	70.5864	1.29288	3913.2
138.47	170.187	161.64	1.33333	20520.5
60.0535	72.7448	69.658	1.21739	3810.94
152.395	165.206	155.621	1.13428	19020.6
67.8865	85.4396	81.4352	1.30769	5208.51
157.242	175.274	161.828	1.19963	20568.2
99.5039	110.597	106.92	1.19321	8978.55
62.1388	68.9986	65.6154	1.22199	3381.44
113.433	142.341	132.416	1.40722	13771.2
93.9967	104.624	101.805	1.1371	8140.01
123.335	135.698	127.881	1.10448	12844
110.776	127.032	118.29	1.2855	10989.7
77.5504	98.9547	93.6324	1.47215	6885.6
130.551	143.588	137.97	1.2	14950.6
82.8031	105.261	98.2024	1.49823	7574.16
176.557	205.959	193.152	1.29412	29301.3
65.2755	72.8767	70.5249	1.08129	3906.38
103.808	129.327	123.636	1.43555	12005.5
65.2755	80.3415	75.8616	1.35233	4519.95
99.2188	124.211	116.85	1.36842	10723.8
113.916	130.374	123.811	1.24519	12039.6
54.8314	59.3553	57.2053	1.04964	2570.17
86.1637	96.4679	91.9013	1.17323	6633.35
140.995	169.788	163.853	1.27778	21086.3
84.9284	108.695	101.932	1.47826	8160.46
146.217	168.244	155.425	1.30001	18972.9
80.9416	90.8768	87.647	1.09677	6033.42
143.644	158.788	153.345	1.15982	18468.4
226.102	253.879	246.604	1.20362	47762.9
103.844	113.176	106.798	1.1096	8958.1
69.6625	80.013	76.9973	1.23704	4656.3
95.7005	101.294	98.5113	1.0727	7621.88
158.938	179.903	174.624	1.25972	23949.6
61.9424	67.851	65.0841	1.16145	3326.9
82.0572	100.082	96.148	1.31397	7260.56
94.1598	125.912	115.731	1.62745	10519.3
189.418	217.261	204.587	1.20388	32873.6
79.3896	101.113	95.6501	1.48837	7185.57
151.008	201.974	189.568	1.58631	28224.1
127.393	140.145	134.82	1.11765	14275.7
65.2755	81.995	77.503	1.39326	4717.66
133	162.401	151.179	1.44155	17950.3
73.8508	81.6319	78.9455	1.175	4894.91
95.8937	106.221	102.06	1.17105	8180.91
98.5147	122.5	114.524	1.38197	10301.1
86.7747	116.805	107.365	1.51064	9053.54
83.5526	98.3481	93.4468	1.25	6858.33
203.539	234.971	220.436	1.17771	38163.9
117.606	156.952	145.085	1.57776	16532.3
107.566	127.766	121.225	1.31547	11541.9
94.1598	103.087	99.998	1.11994	7853.67
145.855	155.816	151.179	1.09895	17950.3
68.6316	95.8541	86.8011	1.61686	5917.53
66.4657	78.8852	75.4601	1.36111	4472.23
192.207	220.742	206.992	1.29616	33650.8
107.052	117.047	114.107	1.07317	10226.1
140.04	172.967	159.994	1.31023	20104.6
104.441	114.036	110.67	1.08249	9619.39
75.7196	83.7939	81.4884	1.06897	5215.33
204.936	216.003	211.513	1.06306	35137
174.938	213.19	195.119	1.31362	29901.2
54.8314	65.0414	62.4988	1.19048	3067.84
88.621	93.0141	88.7297	1.05121	6183.4
88.7254	94.2798	91.0949	1.06431	6517.46
130.551	148.476	136.101	1.24532	14548.4
67.4196	88.9704	83.3838	1.42687	5460.76
69.2712	82.0467	76.6017	1.37116	4608.58
145.877	179.543	167.624	1.3875	22068
123.89	153.86	144.395	1.44476	16375.5
91.3857	98.6471	93.9101	1.08622	6926.5
132.707	159.266	144.965	1.36138	16505
65.2755	71.1701	68.5273	1.14254	3688.23
93.9967	120.792	114.865	1.36111	10362.5
80.9416	99.6632	94.8756	1.29032	7069.67
88.7747	103.763	98.7753	1.27997	7662.79
163.924	183.041	177.972	1.11311	24876.8
98.4288	113.543	109.01	1.1819	9333.06
100.912	111.564	106.96	1.21071	8985.37
139.9	173.761	161.317	1.39814	20438.6
104.441	142.906	132.383	1.6	13764.4
143.434	154.921	149.475	1.12798	17548.1
64.3658	72.9645	69.658	1.23595	3810.94
122.074	137.011	131.924	1.10859	13668.9
209.395	242.981	227.47	1.26027	40638.7
139.278	173.333	160.265	1.46972	20172.8
96.6077	109.958	105.407	1.1385	8726.3
159.08	186.996	176.822	1.35576	24556.4
78.3306	90.5471	86.951	1.18526	5937.98
177.242	205.386	192.972	1.23958	29246.8
163.464	199.351	189.247	1.37125	28128.7
106.261	127.297	117.295	1.34133	10805.6
57.4424	67.4822	64.7499	1.22068	3292.82
131.832	177.163	164.356	1.58485	21215.8
46.9984	54.7758	52.3732	1.15699	2154.31
102.893	111.845	107.809	1.10167	9128.53
94.1598	114.491	109.606	1.39216	9435.32
201.451	282.509	255.456	1.70212	51253.4
141.305	161.666	156.372	1.21315	19204.7
86.7747	98.9491	94.6925	1.23484	7042.4
115.567	131.273	124.754	1.26647	12223.6
115.602	153.152	142.671	1.48387	15986.9
177.743	205.048	189.202	1.20533	28115.1
88.5188	107.771	102.654	1.3599	8276.35
70.7073	87.7154	82.5468	1.46861	5351.68
103.958	115.662	111.918	1.16473	9837.54
151.35	166.392	161.398	1.12393	20459.1
112.391	123.054	116.85	1.14893	10723.8
86.1637	98.989	95.2864	1.23217	7131.03
140.139	177.135	166.272	1.34182	21713.5
95.8937	110.455	104.663	1.26923	8603.59
97.8523	103.731	99.7373	1.07225	7812.77
165.167	199.404	186.452	1.3777	27303.8
83.0821	102.974	96.1931	1.44848	7267.38
98.6039	126.799	116.813	1.51058	10717
107.052	114.415	109.922	1.09756	9489.86
168.27	188.173	174.798	1.17698	23997.3
173.549	185.001	178.045	1.10638	24897.2
107.052	115.381	112.536	1.08439	9946.62
154.419	185.874	173.652	1.36189	23683.7
70.4975	87.9351	84.4697	1.33333	5603.92
83.0821	92.3394	87.3494	1.22222	5992.52
44.3873	52.9675	50.5172	1.11765	2004.32
213.7	242.919	227.528	1.16344	40659.1
141.404	157.621	153.147	1.20871	18420.7
106.562	130.538	121.369	1.42773	11569.2
91.7146	98.9551	95.8315	1.17574	7212.84
177.242	203.413	195.962	1.28717	30160.3
151.28	164.246	158.905	1.07773	19831.9
87.0367	94.0475	90.9996	1.16118	6503.82
219.259	237.997	224.184	1.09008	39472.9
44.3873	52.8196	50.1723	1.24564	1977.05
107.052	121.418	110.709	1.20835	9626.2
178.638	218.489	204.715	1.43915	32914.5
125.546	145.035	138.598	1.23529	15087
100.667	105.433	102.738	1.0848	8289.99
343.352	391.673	367.156	1.20709	105875
190.585	219.962	209.948	1.25152	34618.9
75.7196	87.7489	84.4183	1.18929	5597.11
143.416	176.715	166.272	1.29082	21713.5
97.8523	116.475	107.406	1.39623	9060.36
96.006	117.059	108.251	1.40385	9203.52
145.62	198.11	182.761	1.59109	26233.5
130.344	181.987	167.183	1.64012	21952.1
67.8865	72.7382	69.7825	1.14179	3824.58
153.609	164.616	157.202	1.14924	19409.2
156.758	219.703	199.801	1.68763	31353.3
80.7761	91.9907	88.3375	1.25886	6128.87
124.481	131.688	126.927	1.0625	12653.1
61.9424	70.8365	67.6349	1.26958	3592.78
106.956	123.156	116.925	1.24939	10737.4
76.5692	92.6703	88.0422	1.39618	6087.96
195.081	209.053	204.524	1.11215	32853.2
67.8865	78.4766	75.4025	1.19448	4465.41
83.0821	95.5566	91.3328	1.27891	6551.55
110.476	142.524	134.981	1.43867	14309.8
92.0284	97.1102	93.5396	1.09578	6871.96
208.882	270.137	253.255	1.41539	50374
115.188	151.48	138.754	1.55486	15121
95.2519	106.703	101.206	1.14564	8044.56
65.2755	70.5648	67.9549	1.15377	3626.87
91.3857	97.9247	95.0584	1.10687	7096.94
121.69	158.265	147.37	1.50044	17057.2
127.919	158.524	148.864	1.4033	17404.9
140.705	182.054	167.572	1.40489	22054.4
137.994	191.304	174.5	1.67511	23915.5
140.422	159.468	149.446	1.24277	17541.2
101.545	113.32	109.447	1.14663	9408.05
142	199.837	184.18	1.60413	26642.5
136.624	152.901	143.157	1.20199	16095.9
75.7196	83.2164	80.2	1.15117	5051.71
62.6645	72.8154	68.6539	1.125	3701.86
73.8508	82.6946	78.2276	1.22507	4806.28
58.5756	70.2261	66.535	1.37454	3476.89
120.969	140.495	133.623	1.22396	14023.4
137.968	186.217	170.499	1.56474	22831.6
62.6645	86.9246	80.7393	1.41667	5119.89
187.956	212.657	203.033	1.14155	32376
160.838	191.712	177.923	1.34415	24863.2
88.5949	96.5203	93.0745	1.0829	6803.79
172.904	225.325	204.566	1.47363	32866.8
60.0535	70.4987	66.9253	1.17391	3517.79
78.3306	92.9835	89.1201	1.26812	6237.94
75.7196	85.2723	81.6481	1.25906	5235.78
60.0535	78.0796	73.1233	1.40548	4199.53
44.3873	52.1234	49.9121	1.11765	1956.6
153.978	180.736	168.888	1.30013	22402.1
104.441	117.931	114.524	1.14211	10301.1
146.217	169.724	161.801	1.28571	20561.4
84.9284	93.4095	90.4734	1.1329	6428.83
121.12	129.501	125.206	1.10638	12312.3
80.9416	94.3705	90.4734	1.2784	6428.83
88.303	93.8874	91.6649	1.11796	6599.27
229.312	253.057	236.837	1.04167	44054.2
77.5433	81.3061	79.2199	1.08922	4929
97.8523	109.097	104.912	1.20755	8644.5
89.9864	101.341	96.2382	1.17156	7274.19
107.084	125.907	120.327	1.25119	11371.5
101.042	129.337	118.729	1.41598	11071.5
112.622	150.58	141.142	1.57377	15646
134.778	156.076	150.286	1.26027	17738.9
156.656	194.583	181.378	1.38515	25838
133.162	150.197	145.622	1.17982	16655
101.545	113.352	107.204	1.21818	9026.27
64.6194	79.3331	74.5341	1.42857	4363.15
70.1583	87.9827	81.9664	1.5	5276.69
123.7	160.974	150.891	1.41791	17882.1
120.008	158.966	149.156	1.50769	17473.1
100.857	119.492	113.878	1.29503	10185.2
88.7747	100.895	94.3711	1.20588	6994.68
152.575	187.759	171.363	1.39255	23063.4
62.6645	90.548	84.1093	1.625	5556.2
130.628	144.171	132.514	1.1934	13791.7
148.921	177.585	171.185	1.27667	23015.6
153.96	168.371	163.03	1.16269	20875
78.3306	83.7339	80.9541	1.07126	5147.16
130.055	152.677	142.55	1.27786	15959.6
87.3514	106.737	101.677	1.34319	8119.55
168.011	200.509	188.166	1.32967	27808.3
124.16	170.938	159.232	1.51702	19913.7
116.931	124.086	121.154	1.07629	11528.3
145.778	168.128	156.981	1.20942	19354.7
186.473	234.15	218.894	1.37867	37632.2
90.4672	113.055	104.705	1.44898	8610.41
102.56	114.998	105.325	1.17855	8712.67
121.49	155.636	148.134	1.37855	17234.5
80.9416	85.682	83.4358	1.04444	5467.58
75.7196	103.661	96.1931	1.5395	7267.38
370.662	405.471	379.903	1.15479	113353
98.3411	101.843	98.5113	1.02357	7621.88
73.1086	84.3407	80.3082	1.29116	5065.35
60.0535	68.2255	65.3503	1.14484	3354.17
107.084	129.945	122.011	1.34483	11691.9
46.9984	53.1692	50.6887	1.23077	2017.96
145.855	166.492	157.175	1.20253	19402.4
219.681	241.058	230.051	1.14425	41565.8
79.3896	87.1855	83.7473	1.13953	5508.48
135.773	149.929	143.823	1.19975	16245.9
78.3306	83.8218	81.5417	1.09552	5222.15
154.05	172.369	162.042	1.22617	20622.7
104.441	117.754	112.536	1.2555	9946.62
66.4657	73.7873	71.2596	1.16667	3988.19
101.83	113.992	110.08	1.20209	9517.13
115.901	142.107	135.494	1.42872	14418.9
138.71	156.284	147.134	1.18388	17002.7
113.556	139.297	131.825	1.3473	13648.5
133.246	174.138	158.303	1.59497	19681.9
116.842	133.554	126.344	1.2817	12537.2
62.6645	85.3664	79.9832	1.41667	5024.44
68.312	77.1281	73.6555	1.24324	4260.89
44.3873	53.3139	50.4312	1.27386	1997.51
156.633	211.621	196.515	1.55756	30330.7
99.2188	102.475	99.7808	1.02575	7819.59
130.551	149.415	143.853	1.24804	16252.7
104.441	116.065	110.787	1.18941	9639.84
86.1637	93.9586	91.1902	1.07294	6531.09
74.1748	88.3143	83.8509	1.31364	5522.11
80.4713	109.805	100.69	1.64881	7962.75
57.4424	69.1967	65.0174	1.38617	3320.09
111.811	121.885	118.143	1.14629	10962.4
121.854	148.23	139.689	1.35706	15325.6
73.1086	81.6937	78.8355	1.10901	4881.28
169.527	196.592	190.641	1.25238	28544.6
57.4424	63.9233	61.3776	1.04545	2958.76
157.66	206.312	191.753	1.59895	28878.6
103.391	111.599	106.757	1.08929	8951.28
46.9984	53.1155	50.6887	1.03448	2017.96
114.376	154.225	141.786	1.62642	15789.2
127.94	134.031	130.8	1.05714	13437.1
184.78	212.002	201.423	1.23994	31864.6
54.8314	70.2533	66.4044	1.42566	3463.25
91.3686	119.942	111.256	1.56455	9721.65
81.2359	109.408	102.103	1.47727	8187.73
44.3873	49.0083	46.7698	1.09826	1717.99
108.93	113.097	110.237	1.06033	9544.4
113.99	124.922	120.579	1.08066	11419.2
36.5543	46.0559	43.5004	1.21429	1486.2
44.3873	52.5731	49.8251	1.24658	1949.78
101.808	150.998	136.483	1.73957	14630.2
110.776	136.436	128.355	1.43333	12939.5
145.835	178.84	164.25	1.40932	21188.6
137.856	158.52	150.084	1.16295	17691.2
188.506	208.045	199.54	1.14196	31271.5
39.1653	48.5864	45.8324	1.23279	1649.82
79.3197	94.7127	90.7608	1.31914	6469.74
144.152	158.214	148.075	1.1424	17220.8
113.946	124.597	120.723	1.1582	11446.5
114.885	130.213	125.759	1.19261	12421.3
151.394	182.25	174.823	1.30488	24004.2
117.496	132.456	128.727	1.15015	13014.5
198.219	231.04	212.005	1.34168	35300.6
116.051	145.203	136.452	1.39991	14623.4
79.3896	92.3416	87.4983	1.31507	6012.97
156.661	171.39	162.577	1.15331	20759.1
73.1086	84.4321	81.0612	1.14286	5160.79
109.769	133.111	125.656	1.34837	12400.9
98.2284	111.267	107.809	1.19358	9128.53
83.5526	89.8892	87.2997	1.06016	5985.7
46.9984	59.6072	56.3645	1.27778	2495.18
159.272	189.096	179.381	1.28743	25272.2
67.8865	75.0761	72.2275	1.13158	4097.27
173.267	200.119	190.55	1.29767	28517.3
65.2755	74.1353	71.5028	1.12	4015.46
188.346	201.429	193.376	1.08377	29369.5
163.729	184.833	177.508	1.18251	24747.3
90.4672	95.0121	92.2313	1.02857	6681.08
52.2204	61.8542	59.2183	1.15	2754.24
118.499	159.015	147.34	1.48109	17050.4
70.4975	82.765	79.3841	1.20049	4949.45
97.8523	105.629	102.4	1.17588	8235.45
154.234	182.959	168.837	1.29763	22388.4
84.8767	98.3957	92.1842	1.25744	6674.26
80.0923	97.7485	93.2608	1.37521	6831.06
147.527	161.773	151.637	1.16757	18059.4
101.83	113.109	109.487	1.05128	9414.86
80.9416	91.4111	87.8448	1.22603	6060.69
101.545	121.379	115.091	1.32021	10403.4
57.4424	65.892	62.1506	1.11998	3033.75
120.107	146.138	138.848	1.33964	15141.5
57.4424	66.0929	63.8046	1.13636	3197.37
190.275	217.675	202.626	1.2354	32246.4
127.94	137.991	133.2	1.12579	13934.8
61.775	68.1827	65.483	1.18542	3367.81
124.581	144.613	137.75	1.33824	14902.9
150.924	194.741	179.333	1.52439	25258.6
78.3306	91.7895	87.0507	1.2	5951.61
112.274	120.041	116.441	1.07773	10648.8
70.4975	83.4004	78.7804	1.36363	4874.46
117.908	128.289	124.266	1.12797	12128.2
80.9416	97.8388	92.3254	1.2528	6694.71
157.199	167.767	163.641	1.07772	21031.8
99.6986	128.722	120.759	1.50236	11453.3
65.2755	74.3724	70.7706	1.21816	3933.65
140.878	177.403	165.776	1.4026	21584
94.9549	122.496	115.656	1.43921	10505.7
171.285	189.756	180.274	1.17647	25524.4
41.7763	52.7583	49.8251	1.28834	1949.78
87.3239	102.909	98.907	1.28823	7683.24
183.864	227.518	210.794	1.4164	34898.4
124.776	157.964	146.068	1.36585	16757.2
65.7891	86.0615	80.0917	1.5126	5038.08
138.384	165.773	153.43	1.27088	18488.9
98.9498	127.934	118.07	1.54258	10948.8
107.833	120.097	115.731	1.12854	10519.3
76.31	101.699	94.7383	1.5841	7049.22
57.2344	73.5891	68.3371	1.54839	3667.77
49.6094	58.3604	55.4328	1.18231	2413.37
41.7763	50.5556	47.8704	1.125	1799.8
198.438	224.98	213.738	1.26316	35880.1
78.3306	88.3502	85.8458	1.13333	5787.99
117.048	150.789	142.184	1.44554	15877.8
99.2188	103.495	100.085	1.06187	7867.31
82.4073	99.7279	95.1497	1.39659	7110.57
175.359	215.952	196.007	1.49233	30173.9
73.1086	82.3687	78.8905	1.16667	4888.09
81.0772	95.5985	91.4278	1.253	6565.18
100.426	109.617	105.654	1.11947	8767.21
169.857	206.538	194.785	1.37292	29799
123.332	145.214	135.942	1.34992	14514.3
140.144	167.894	154.417	1.32822	18727.5
122.464	144.718	138.033	1.29454	14964.2
200.17	221.275	215.135	1.19428	36350.5
116.786	126.116	122.259	1.15751	11739.6
106.625	119.48	112.15	1.1867	9878.45
137.935	156.072	147.723	1.24177	17139
112.008	124.142	118.839	1.19382	11092
105.237	137.514	129.533	1.54777	13178.1
94.1598	118.137	112.266	1.43137	9898.9
76.8245	112.199	102.018	1.78377	8174.09
50.8699	62.6875	58.9244	1.43455	2726.97
97.8523	110.591	105.9	1.26415	8808.11
64.6194	82.9455	78.4492	1.42857	4833.55
123.928	148.919	142.793	1.39373	16014.1
99.2188	103.037	100.518	1.02632	7935.48
176.877	213.686	198.187	1.42047	30848.9
123.7	158.646	148.397	1.44776	17295.8
84.9284	104.055	95.5593	1.38448	7171.93
145.855	184.549	167.598	1.45655	22061.2
98.9489	112.149	106.839	1.24039	8964.91
131.085	164.628	155.034	1.37395	18877.5
176.104	195.221	182.285	1.20055	26097.1
62.7732	70.9959	68.464	1.20588	3681.41
67.8865	71.8892	69.3458	1.04221	3776.85
120.008	145.029	137.245	1.32308	14793.8
131.527	174.308	159.205	1.55254	19906.9
201.049	218.014	206.13	1.12092	33371.3
102.544	116.058	111.646	1.163	9789.82
60.0535	69.6289	67.2487	1.17391	3551.88
123.964	134.309	130.767	1.17627	13430.3
96.6077	107.728	104.456	1.12899	8569.5
180.527	194.27	188.765	1.03842	27985.5
136.624	162.528	153.288	1.31081	18454.8
65.2755	71.6825	69.3458	1.06688	3776.85
71.2996	89.1385	84.3669	1.44982	5590.29
79.3896	91.2687	87.1504	1.16279	5965.25
47.3986	56.1033	53.2769	1.34358	2229.3
187.613	200.167	192.769	1.12582	29185.4
113.901	130.624	126.482	1.22467	12564.5
75.7196	84.8427	82.0193	1.11364	5283.5
135.681	147.489	142.702	1.10189	15993.7
129.239	144.19	140.618	1.19412	15530.1
62.7732	72.7193	69.658	1.28252	3810.94
130.142	158.682	153.062	1.35053	18400.2
93.9967	100.816	97.8039	1.07698	7512.8
109.663	115.29	112.034	1.03218	9858
52.2204	65.0029	60.7379	1.25	2897.41
45.7044	63.5028	58.555	1.64826	2692.88
179.105	232.91	213.271	1.50543	35723.3
157.689	191.897	183.282	1.23798	26383.4
109.663	128.577	123.108	1.21441	11903.2
88.7747	93.8723	91.4278	1.02941	6565.18
86.7747	94.9279	91.2853	1.12946	6544.73
93.9967	107.699	103.286	1.275	8378.62
65.2755	81.2308	76.261	1.36038	4567.68
125.373	136.511	128.996	1.06485	13069
88.7747	111.622	105.49	1.38304	8739.94
152.172	174.577	166.429	1.23699	21754.4
62.6645	90.657	82.2835	1.625	5317.59
53.5418	86.4899	76.4316	2.00324	4588.13
252.825	308.902	290.468	1.33887	66265.4
55.3881	63.0109	60.3076	1.26667	2856.5
121.854	147.122	137.15	1.31592	14773.4
108.793	121.551	117.517	1.14335	10846.5
73.1086	80.2026	77.5589	1.09756	4724.48
60.0535	66.0581	63.8046	1.11174	3197.37
52.2204	60.0749	57.2053	1.25406	2570.17
180.814	193.941	190.048	1.14058	28367.3
146.136	170.625	163.88	1.28571	21093.1
75.7196	88.3396	85.4404	1.13793	5733.45
122.464	133.641	122.578	1.05526	11801
65.2755	89.2452	82.8092	1.52	5385.77
72.0045	86.2755	80.2	1.39917	5051.71
51.6956	56.849	54.2457	1.21429	2311.11
126.124	174.99	161.747	1.6607	20547.7
138.384	170.243	155.09	1.37736	18891.1
49.6094	58.5553	55.5892	1.31329	2427
103.173	119.029	113.726	1.30926	10158
144.009	172.352	163.986	1.32051	21120.4
73.1086	85.2364	81.9134	1.17857	5269.87
77.5433	96.5207	90.0889	1.4347	6374.29
128.819	165.926	155.732	1.53647	19047.9
65.2755	70.5869	68.0188	1.06693	3633.69
112.274	119.96	116.292	1.08546	10621.5
57.4424	62.8462	60.6664	1.06061	2890.59
86.1637	94.4662	90.7608	1.14379	6469.74
49.6094	53.6726	51.706	1.07143	2099.77
70.4975	75.4405	73.1233	1.04563	4199.53
39.1653	44.603	42.2862	1.08333	1404.39
123.228	133.617	126.585	1.15225	12585
81.2359	90.9014	87.4983	1.25	6012.97
59.0751	72.6159	68.6539	1.39456	3701.86
139.396	180.217	163.827	1.36096	21079.5
135.808	164.461	155.369	1.36539	18959.3
108.948	129.301	123.566	1.33492	11991.9
120.179	134.908	130.933	1.24829	13464.4
39.1653	51.7922	48.7686	1.33333	1867.97
80.9317	100.261	90.8564	1.35737	6483.37
162.002	201.74	188.535	1.47628	27917.4
78.3306	87.5374	84.6237	1.13819	5624.38
93.7601	111.568	106.879	1.25629	8971.73
132.85	161.795	151.408	1.36662	18004.8
115.508	148.341	139.191	1.43855	15216.5
121.556	161.975	147.694	1.63372	17132.2
136.869	178.421	164.409	1.48041	21229.5
88.5188	113.056	106.554	1.47995	8917.19
46.9984	52.7825	50.603	1.12931	2011.14
103.586	112.096	108.451	1.0775	9237.61
114.885	122.796	118.912	1.09053	11105.6
116.349	139.967	131.891	1.32772	13662.1
140.872	164.785	158.111	1.26913	19634.2
97.9439	114.43	108.931	1.27904	9319.42
122.366	142.872	132.022	1.26289	13689.4
60.0535	67.1914	64.4138	1.08979	3258.73
114.469	119.852	117.184	1.03435	10785.2
107.084	137.458	129.834	1.44828	13239.4
52.2204	61.9155	59.3647	1.15	2767.87
57.4424	67.5981	64.9506	1.18182	3313.27
99.6986	114.132	108.531	1.1683	9251.25
127.94	140.192	136.197	1.1432	14568.8
139.797	166.867	153.571	1.35031	18522.9
70.1583	85.9069	81.7012	1.34211	5242.6
107.536	117.734	112.034	1.16667	9858
56.7044	68.1806	64.2114	1.41184	3238.28
146.217	164.616	159.041	1.2375	19866
91.3857	105.529	100.776	1.24806	7976.39
90.2651	114.089	105.941	1.47492	8814.93
123.7	144.172	139.409	1.29851	15264.2
138.384	150.613	144.905	1.07415	16491.4
78.3306	88.3851	84.5211	1.21325	5610.74
88.7747	98.6652	94.9671	1.11538	7083.31
112.274	125.09	121.547	1.14537	11603.3
74.6054	85.06	81.5949	1.27068	5228.97
116.315	133.034	124.859	1.27527	12244.1
88.621	104.567	98.7314	1.29167	7655.97
67.8865	79.9233	76.8845	1.24044	4642.67
85.9986	96.3913	93.1677	1.19115	6817.43
99.2188	118.106	111.762	1.28724	9810.28
59.7327	70.3061	66.4698	1.36256	3470.07
54.8314	62.3523	59.3647	1.22581	2767.87
123.7	148.212	142	1.27642	15836.9
47.3986	58.2523	54.6443	1.44268	2345.19
138.384	154.945	150.113	1.2104	17698
91.3857	99.9279	97.5817	1.08571	7478.72
60.0535	64.0395	61.8706	1.09091	3006.48
104.441	124.966	117.443	1.32723	10832.9
122.194	135.841	130.966	1.22624	13471.2
153.845	192.054	182.951	1.44091	26288
101.83	112.78	108.691	1.19139	9278.52
74.0295	84.2664	79.657	1.29268	4983.54
140.995	147.166	143.278	1.06996	16123.2
75.3602	89.8775	85.7952	1.35472	5781.18
127.37	150.194	142.58	1.38349	15966.4
105.237	122.779	117.517	1.15789	10846.5
214.337	247.624	226.38	1.21894	40250.1
112.274	127.744	123.425	1.26742	11964.6
91.3857	99.6588	96.8227	1.09371	7362.82
139.911	176.251	165.461	1.35693	21502.2
86.1637	94.131	91.4278	1.17005	6565.18
41.7763	46.4668	44.1933	1.21739	1533.92
103.624	132.454	120.975	1.49359	11494.2
89.3941	106.497	98.1582	1.36715	7567.34
80.9416	95.65	92.1371	1.2689	6667.44
129.259	139.389	134.304	1.07843	14166.6
186.376	220.8	210.32	1.37519	34741.6
95.4653	115.334	109.883	1.35187	9483.04
160.25	182.042	171.54	1.27586	23111.1
57.4424	62.0265	59.8743	1.01866	2815.6
88.7747	104.472	97.2699	1.36735	7430.99
93.5108	118.313	109.804	1.48077	9469.4
90.4672	114.604	107.809	1.46939	9128.53
138.019	155.569	146.128	1.2037	16770.9
97.8523	126.263	118.693	1.45283	11064.7
158.744	176.873	164.567	1.182	21270.4
96.8349	113.592	108.411	1.20395	9230.79
142.163	170.15	158.905	1.23806	19831.9
62.6645	69.8338	66.6654	1.23529	3490.52
49.6094	55.5628	53.6018	1.06297	2256.57
131.404	146.554	142.245	1.22438	15891.4
62.5027	70.0374	67.3777	1.20133	3565.51
75.7196	82.9809	77.2225	1.0882	4683.57
99.6986	106.62	102.527	1.12963	8255.9
112.274	131.349	123.776	1.23723	12032.8
119.318	145.266	136.642	1.34568	14664.3
88.3255	97.5333	93.725	1.10319	6899.23
147.552	195.952	178.775	1.57313	25101.8
64.5073	74.8793	70.4633	1.26527	3899.57
155.574	181.763	168.09	1.2829	22190.7
129.239	135.59	129.667	1.11429	13205.4
125.329	142.813	136.388	1.23735	14609.7
132.39	145.554	137.403	1.16704	14827.9
83.5899	103.863	97.4037	1.39873	7451.45
121.537	143.548	134.82	1.33953	14275.7
122.718	148.981	135.238	1.34043	14364.3
114.885	121.089	117.369	1.04876	10819.3
118.098	129.947	125.552	1.15625	12380.4
225.245	245.733	236.855	1.2093	44061
191.956	226.288	212.741	1.21823	35546.1
135.773	145.585	140.062	1.10634	15407.4
93.9967	112.546	107.001	1.33333	8992.18
138.457	182.222	169.504	1.561	22565.7
123.7	138.606	128.996	1.26866	13069
125.837	145.422	139.503	1.25911	15284.7
135.17	148.286	143.611	1.10247	16198.2
93.9967	103.554	98.6434	1.1449	7642.33
80.9416	92.0678	87.6965	1.25758	6040.24
123.892	135.322	131.264	1.17404	13532.6
155.95	182.349	171.54	1.26278	23111.1
73.8508	88.9839	84.264	1.4	5576.65
145.855	163.327	153.43	1.23326	18488.9
46.9984	54.1966	52.124	1.11237	2133.85
183.04	191.449	183.33	1.06549	26397.1
134.212	146.877	140.618	1.19218	15530.1
161.654	179.464	173.777	1.15778	23717.8
254.785	290.54	269.237	1.23913	56932.3
87.6802	96.2481	93.2142	1.18247	6824.24
148.828	208.236	189.957	1.64742	28340
123.013	162.118	152.579	1.53695	18284.3
198.544	214.467	201.078	1.17229	31755.6
130.551	139.165	135.045	1.04	14323.4
109.663	114.836	112.575	1.05124	9953.44
171.703	192.496	179.042	1.2181	25176.8
91.3857	105.806	102.103	1.21492	8187.73
133.162	182.761	168.837	1.63432	22388.4
90.9444	99.5062	96.3734	1.10112	7294.65
114.766	127.03	121.333	1.08511	11562.4
147.112	176.992	165.54	1.37058	21522.6
169.857	212.96	199.017	1.44565	31107.9
84.9284	93.0992	89.8959	1.13684	6347.02
121.211	141.506	130.867	1.31004	13450.8
208.629	262.011	243.326	1.38938	46501.7
97.5188	110.774	106.879	1.20315	8971.73
114.885	142.915	132.055	1.38636	13696.2
120.344	135.463	130.102	1.23	13294
188.421	238.184	219.568	1.43476	37864
123.7	141.518	130.268	1.25373	13328.1
114.468	131.118	119.094	1.22439	11139.7
199.336	222.242	212.169	1.26852	35355.2
155.087	173.997	166.142	1.16828	21679.4
101.545	111.37	107.446	1.09091	9067.18
125.287	149.121	143.036	1.25661	16068.7
81.2359	97.4969	90.0407	1.34091	6367.48
57.4424	65.5854	62.9141	1.04545	3108.75
177.242	193.781	182.333	1.08333	26110.7
127.477	165.399	151.923	1.52178	18127.5
183.387	195.142	189.179	1.07588	28108.2
93.9967	103.533	99.7808	1.13889	7819.59
143.606	169.86	162.657	1.30909	20779.5
86.3644	117.681	107.849	1.63729	9135.35
111.623	124.112	117.147	1.21055	10778.3
75.4045	80.3936	78.1721	1.12282	4799.47
140.134	154.976	147.605	1.14474	17111.7
112.274	123.787	119.021	1.15318	11126
75.7196	85.7762	83.0186	1.10345	5413.04
105.875	113.889	110.866	1.09784	9653.47
110.776	129.558	124.754	1.3	12223.6
118.161	145.554	137.844	1.28125	14923.3
66.9206	73.4945	70.7093	1.14661	3926.84
52.2204	62.3301	59.3647	1.19628	2767.87
165.393	186.883	179.864	1.16939	25408.5
205.996	247.932	231.93	1.30955	42247.6
57.4424	66.5401	63.4635	1.26939	3163.29
120.643	146.15	135.782	1.3532	14480.2
116.315	147.8	140.742	1.44505	15557.4
131.977	184.194	168.631	1.63447	22333.9
182.771	204.449	192.769	1.08326	29185.4
113.598	141.768	132.514	1.36734	13791.7
170.297	197.056	184.956	1.31496	26867.5
65.2755	71.5403	69.095	1.13514	3749.58
124.716	154.022	144.365	1.36822	16368.6
73.5251	87.2496	82.8616	1.29416	5392.58
142.857	163.293	152.693	1.23117	18311.6
130.201	145.362	139.191	1.17568	15216.5
46.9984	52.1476	49.8251	1.16064	1949.78
92.266	100.999	97.2253	1.07187	7424.18
75.7196	83.516	80.3622	1.15036	5072.16
60.0535	74.4673	70.8932	1.30435	3947.29
80.9416	91.0735	88.0422	1.12903	6087.96
130.551	138.615	134.755	1.08693	14262.1
107.084	130.243	121.69	1.37931	11630.5
163.668	175.554	166.585	1.12401	21795.3
169.361	188.143	181.091	1.21689	25756.2
67.8865	75.0585	72.7663	1.04298	4158.63
52.1696	65.4846	61.1651	1.48793	2938.31
114.469	138.054	129.634	1.33871	13198.5
145.82	175.416	166.95	1.35	21890.8
135.773	150.149	143.218	1.06098	16109.6
125.053	132.233	126.585	1.05992	12585
46.9984	55.3611	52.7036	1.17878	2181.58
96.5455	112.872	104.539	1.32432	8583.14
94.1598	117.663	108.97	1.40681	9326.24
77.5433	95.738	89.4604	1.47619	6285.67
75.7196	83.8818	80.6318	1.09091	5106.25
170.036	203.288	189.683	1.36482	28258.2
54.8305	65.4981	61.6598	1.3778	2986.03
105.237	138.387	126.173	1.5614	12503.2
80.9416	92.1068	88.0422	1.20814	6087.96
99.6986	119.329	113.916	1.33333	10192.1
86.1637	95.8553	92.9345	1.11242	6783.34
169.236	191.185	183.519	1.19285	26451.6
105.402	120.042	115.393	1.19576	10457.9
179.978	205.159	200.018	1.19914	31421.5
126.862	138.064	129.533	1.17249	13178.1
82.8618	93.1716	88.8275	1.26631	6197.04
97.4069	108.423	102.907	1.14744	8317.26
92.3135	106.488	101.805	1.25284	8140.01
68.2647	79.3548	74.9985	1.2973	4417.69
132.625	140.934	133.623	1.0905	14023.4
78.3306	90.6996	87.399	1.16667	5999.33
156.661	199.553	183.59	1.50944	26472.1
99.2188	112.394	108.01	1.21053	9162.62
131.102	158.799	148.602	1.34615	17343.5
70.4975	81.4063	77.11	1.2376	4669.94
139.961	157.191	151.666	1.22158	18066.2
83.5526	90.2675	87.3494	1.0928	5992.52
129.239	146.42	138.441	1.22857	15052.9
143.606	181.448	168.605	1.38563	22327.1
88.7747	96.4962	93.2142	1.1279	6824.24
148.682	169.388	161.962	1.1874	20602.3
126.173	155.893	145.741	1.43856	16682.2
85.5575	96.4015	92.3254	1.23614	6694.71
123.628	164.741	153.118	1.53029	18413.9
130.551	155.871	145.949	1.35903	16730
121.8	144.761	136.833	1.31338	14705.2
174.938	187.992	181.999	1.1048	26015.3
127.94	161.187	149.91	1.50148	17650.3
116.404	141.048	131.759	1.37689	13634.9
88.8883	110.403	102.823	1.42709	8303.62
198.438	223.578	207.933	1.24275	33957.6
159.146	167.744	158.659	1.1062	19770.5
80.9416	98.3919	94.3251	1.22581	6987.86
93.5312	113.428	107.204	1.33605	9026.27
175.396	188.767	175.912	1.10526	24304.1
125.329	155.127	147.664	1.29441	17125.4
80.9416	86.2532	83.7991	1.08298	5515.3
93.9967	104.127	100.431	1.13976	7921.85
109.663	130.258	120.651	1.35207	11432.8
99.121	107.236	101.975	1.1227	8167.28
98.324	124.432	118.437	1.47651	11017
65.2755	78.6077	75.2873	1.25383	4451.78
62.7732	82.1278	76.6584	1.55882	4615.4
73.112	101.61	91.5701	1.74746	6585.63
88.7747	101.623	96.9571	1.08815	7383.27
107.052	120.234	113.726	1.20835	10158
135.773	168.744	159.014	1.3979	19859.2
54.8314	64.5174	62.0807	1.19615	3026.94
100.63	126.134	118.07	1.36693	10948.8
60.9269	67.6197	64.5485	1.21212	3272.36
101.83	114.731	110.434	1.16915	9578.48
79.5145	89.9252	85.6433	1.23742	5760.72
73.1086	84.7279	81.3818	1.25158	5201.7
112.948	136.127	125.932	1.3405	12455.4
75.6971	87.972	83.6955	1.26829	5501.66
127.94	139.777	134.433	1.11848	14193.9
80.9416	85.3498	82.4415	1.04119	5338.04
161.977	184.65	173.026	1.26469	23513.3
82.146	93.277	87.7459	1.23001	6047.06
139.484	155.287	149.243	1.15422	17493.5
169.458	195.14	183.519	1.29301	26451.6
232.381	291.458	273.444	1.4382	58725.3
67.8865	71.9382	69.5957	1.1254	3804.12
98.0795	117.18	111.412	1.28831	9748.92
81.2359	96.7548	92.4193	1.34121	6708.35
110.928	130.698	123.741	1.24767	12025.9
60.6038	73.5146	69.5957	1.36727	3804.12
62.6645	69.6702	66.7304	1.08333	3497.34
112.622	130.733	124.371	1.2459	12148.7
122.718	131.62	127.711	1.11782	12809.9
97.8523	111.518	107.406	1.20755	9060.36
101.194	109.28	102.823	1.17317	8303.62
110.776	120.481	114.335	1.1194	10267
139.702	167.155	157.781	1.41002	19552.4
150.851	197.881	183.519	1.45283	26451.6
104.929	111.023	108.131	1.10857	9183.07
97.2198	112.517	107.849	1.26894	9135.35
123.475	130.574	125.966	1.06274	12462.3
82.2346	107.741	100.171	1.56795	7880.94
93.1131	100.517	97.0018	1.07821	7390.09
167.974	187.773	181.043	1.21901	25742.6
88.7747	104.923	100.776	1.26653	7976.39
91.3857	105.203	101.719	1.17143	8126.37
60.0535	72.7382	69.4709	1.26308	3790.49
86.4666	98.0532	93.4932	1.26782	6865.15
116.873	123.65	120.183	1.10903	11344.2
57.4424	62.5056	60.4514	1.02941	2870.14
117.164	144.777	136.452	1.39589	14623.4
102.018	121.186	114.676	1.29008	10328.4
130.551	145.694	139.534	1.13215	15291.5
112.622	143.971	131.956	1.5082	13675.8
44.3873	54.8743	52.3732	1.23529	2154.31
105.299	129.647	123.566	1.37094	11991.9
116.349	146.122	137.939	1.39502	14943.8
162.217	202.718	186.847	1.48116	27419.7
101.594	111.891	107.487	1.17977	9073.99
93.1526	112.777	103.37	1.34939	8392.25
80.9444	97.1358	91.9013	1.35255	6633.35
80.5646	108.501	101.377	1.49204	8071.83
83.5526	96.3371	93.3073	1.17002	6837.88
86.1637	97.7387	93.5396	1.11538	6871.96
172.195	199.44	184.392	1.32605	26703.9
169.857	183.945	175.714	1.0809	24249.6
122.196	130.422	125.067	1.09117	12285
99.762	125.655	116.925	1.44178	10737.4
169.902	194.749	183.826	1.29811	26540.2
156.661	194.191	180.515	1.25008	25592.6
171.825	182.647	173.852	1.10306	23738.3
59.0806	74.8241	70.7093	1.4375	3926.84
90.4591	106.654	102.018	1.35083	8174.09
120.107	149.019	134.594	1.45652	14228
57.4424	66.9129	64.3464	1.13636	3251.91
78.3306	85.7193	82.6519	1.09495	5365.31
179.088	200.453	193.556	1.13402	29424
101.83	120.907	114.6	1.29555	10314.8
134.778	167.384	156.76	1.34247	19300.1
75.7196	86.8114	83.3317	1.21245	5453.94
70.4975	79.8413	76.1471	1.21249	4554.04
67.7466	79.9907	75.575	1.34952	4485.87
121.854	151.711	143.369	1.39394	16143.7
107.052	127.974	121.868	1.31707	11664.6
73.8508	84.1513	80.9541	1.29868	5147.16
96.6077	105.757	102.188	1.12963	8201.36
112.875	147.475	136.101	1.47997	14548.4
48.003	59.9974	55.9006	1.5	2454.27
126.638	164.048	155.006	1.50843	18870.6
49.6094	58.8148	56.133	1.16958	2474.73
224.496	248.152	240.149	1.16323	45295
102.223	116.018	111.918	1.28156	9837.54
52.5853	72.8284	67.1195	1.66637	3538.24
101.545	117.914	111.646	1.29091	9789.82
138.33	150.698	146.157	1.11765	16777.7
118.161	128.008	121.975	1.125	11685.1
105.804	139.55	129.701	1.45518	13212.2
106.704	111.034	108.131	1.07017	9183.07
111.531	149.732	136.928	1.5971	14725.6
65.2755	71.5958	69.1578	1.16667	3756.4
143.305	156.489	146.632	1.11896	16886.8
137.417	181.402	164.514	1.52062	21256.7
39.1653	44.307	42.1835	1.08333	1397.57
147.872	169.271	161.506	1.28505	20486.4
88.621	133.882	123.425	1.79167	11964.6
88.4456	100.236	93.8638	1.21916	6919.69
130.551	169.408	157.973	1.48	19600.1
150.836	198.61	183.519	1.43892	26451.6
67.8865	73.2453	70.7093	1.13619	3926.84
91.3857	99.0262	95.5593	1.03897	7171.93
105.238	136.904	128.727	1.51764	13014.5
84.9284	95.7373	91.5701	1.21739	6585.63
73.1086	80.6369	76.9409	1.04474	4649.48
152.691	174.179	166.872	1.29484	21870.3
122.718	145.394	139.035	1.25722	15182.4
117.496	131.733	124.196	1.23594	12114.6
149.548	186.589	177.972	1.35445	24876.8
164.291	177.784	170.906	1.14607	22940.6
162.714	205.986	191.731	1.38698	28871.8
86.7747	110.921	102.949	1.42937	8324.08
46.9984	53.9949	51.622	1.06897	2092.95
93.9967	100.375	97.1806	1.06702	7417.36
70.1583	74.3814	71.866	1.09776	4056.37
104.441	117.704	113.611	1.14775	10137.5
110.308	124.447	119.422	1.17495	11201
104.441	108.987	106.227	1.0401	8862.65
81.662	95.8588	91.4278	1.3007	6565.18
85.3056	90.9956	88.0422	1.09483	6087.96
159.73	181.89	172.574	1.18349	23390.6
158.986	214.959	196.78	1.64417	30412.5
174.938	200.821	184.463	1.28998	26724.3
91.3857	110.097	105.077	1.35133	8671.77
114.469	151.892	142.245	1.45161	15891.4
164.318	188.535	176.355	1.26057	24426.8
99.6986	119.824	113.382	1.37037	10096.6
120.192	140.624	134.239	1.31328	14153
57.2308	68.8816	64.2789	1.43034	3245.09
96.006	102.565	98.1582	1.06914	7567.34
136.624	165.887	157.313	1.29642	19436.5
134.099	153.717	145.294	1.277	16580
121.854	148.539	142.092	1.3393	15857.3
119.995	152.012	142.489	1.46158	15946
96.6077	107.085	102.78	1.16216	8296.81
51.6797	57.6483	55.1974	1.23768	2392.92
138.384	156.557	149.359	1.16743	17520.8
143.606	159.801	154.22	1.17935	18679.7
151.439	184.584	168.528	1.34483	22306.6
66.4657	73.2911	70.3401	1.22222	3885.93
79.9727	101.535	95.5593	1.44188	7171.93
84.9284	91.6451	88.0915	1.11746	6094.78
70.4975	75.2572	72.4674	1.0645	4124.54
107.052	118.374	113.84	1.09052	10178.4
167.105	177.045	171.236	1.10817	23029.3
86.1637	98.8746	94.1869	1.18401	6967.41
141.896	158.335	152.892	1.17712	18359.3
41.7763	48.6158	46.3035	1.07692	1683.9
113.945	141.223	128.389	1.4325	12946.3
115.969	148.595	138.566	1.47407	15080.1
111.877	139.222	132.678	1.39467	13825.7
95.6926	110.494	105.695	1.22919	8774.03
78.3306	90.4557	87.3494	1.13978	5992.52
80.9416	87.042	84.1609	1.09677	5563.02
145.692	168.29	161.29	1.28442	20431.8
89.7867	102.633	96.5983	1.20398	7328.73
147.702	164.254	156.483	1.24732	19232
52.2204	58.6055	56.0557	1.04869	2467.91
131.085	166.021	154.782	1.53521	18816.1
91.2021	111.624	106.023	1.34113	8828.57
191.918	216.318	209.223	1.17112	34380.3
91.3857	129.456	117.406	1.57143	10826.1
134.778	159.862	153.317	1.30996	18461.6
124.477	142.583	136.324	1.25968	14596.1
202.803	275.529	255.83	1.58541	51403.4
123.7	130.659	125.966	1.10512	12462.3
80.9416	88.1234	85.186	1.11015	5699.37
98.5491	114.643	108.851	1.286	9305.79
97.5967	108.138	102.823	1.13608	8303.62
54.8314	62.6984	60.1635	1.05882	2842.87
93.9967	105.439	101.077	1.13889	8024.11
69.4017	78.0606	74.1839	1.19963	4322.25
83.5526	95.3644	91.5701	1.11376	6585.63
127.393	155.008	145.204	1.42267	16559.5
69.5047	79.3752	75.1142	1.29464	4431.33
96.006	103.924	99.4759	1.14096	7771.87
88.621	112.691	106.391	1.41667	8889.92
167.703	197.259	189.431	1.29711	28183.2
60.9269	78.8571	72.1674	1.5758	4090.46
186.561	211.427	199.083	1.25298	31128.4
87.512	105.427	99.8243	1.37052	7826.4
93.9967	102.771	100.041	1.16722	7860.49
104.441	119.596	114.524	1.1	10301.1
92.1566	121.216	112.382	1.5702	9919.35
130.321	139.621	130.435	1.06279	13362.2
147.86	173.996	166.246	1.2875	21706.7
127.101	154.085	146.395	1.41146	16832.2
151.439	185.59	174.052	1.34483	23792.8
75.7196	83.4135	79.929	1.15127	5017.63
49.6094	54.8743	52.3732	1.17857	2154.31
88.621	107.359	100.041	1.33476	7860.49
152.426	175.781	165.985	1.25185	21638.5
90.4672	108.028	103.16	1.30612	8358.16
180.16	207.572	200.473	1.26674	31564.7
79.3896	111.61	102.865	1.5814	8310.44
123.7	151.108	143.127	1.34328	16089.1
129.239	144.686	137.529	1.22939	14855.2
79.6212	97.7804	93.0745	1.38239	6803.79
109.638	126.205	116.105	1.27067	10587.5
75.5032	85.1742	81.2751	1.25023	5188.06
144.201	163.42	155.621	1.20134	19020.6
165.579	184.501	178.094	1.15582	24910.9
136.595	159.693	149.301	1.28256	17507.1
195.705	220.501	212.455	1.25472	35450.6
73.1086	78.4989	75.4601	1.04227	4472.23
115.848	143.674	132.547	1.33638	13798.5
94.1598	120.293	111.061	1.39216	9687.56
137.752	153.485	142.458	1.17517	15939.1
50.9657	68.5666	62.7759	1.61716	3095.11
87.7672	106.772	100.518	1.29328	7935.48
129.239	174.201	164.382	1.6	21222.6
107.788	127.004	117.332	1.33321	10812.4
162.181	197.522	185.729	1.39787	27092.4
54.8314	63.4091	61.023	1.17754	2924.68
75.7196	90.6763	86.6509	1.27714	5897.07
140.995	161.711	153.118	1.15469	18413.9
52.2204	72.745	67.0548	1.60508	3531.43
120.107	129.013	125.897	1.12506	12448.6
54.8314	64.3067	61.6598	1.19048	2986.03
102.769	126.585	117.073	1.44821	10764.7
117.537	129.572	123.179	1.13868	11916.9
135.956	154.656	147.605	1.24038	17111.7
107.084	119.253	115.43	1.15517	10464.7
79.4528	90.93	84.5724	1.21833	5617.56
156.661	177.771	167.65	1.21667	22074.8
106.937	129.596	120.651	1.38892	11432.8
73.1086	80.4323	77.0537	1.15261	4663.12
83.5526	89.8784	87.4983	1.03178	6012.97
161.883	193.378	181.45	1.28195	25858.5
91.3857	104.607	100.085	1.13574	7867.31
140.995	153.383	146.128	1.07767	16770.9
54.8314	61.0067	58.629	1.09898	2699.7
117.496	133.895	127.405	1.22222	12748.6
79.3896	100.784	95.7408	1.37209	7199.2
92.1564	106.415	102.611	1.2896	8269.54
39.1653	43.9681	41.8737	1.13043	1377.12
151.439	165.737	161.048	1.16667	20370.5
41.7763	51.7922	49.1233	1.1875	1895.24
96.9818	105.809	102.272	1.18564	8215
104.441	110.843	107.809	1.12194	9128.53
117.496	131.351	124.824	1.15556	12237.3
67.8865	84.5545	80.3082	1.26923	5065.35
187.993	226.965	209.099	1.34722	34339.4
97.8523	124.883	117.591	1.43396	10860.2
65.2755	74.0408	71.1377	1.11477	3974.56
145.855	169.12	159.123	1.26582	19886.4
138.384	159.507	149.359	1.21533	17520.8
99.6986	116.326	111.568	1.25926	9776.19
96.006	123.794	115.355	1.5	10451.1
99.2188	123.109	116.478	1.34211	10655.6
83.0656	89.5193	87.1006	1.15326	5958.43
44.3873	61.6339	57.5079	1.47059	2597.44
109.663	125.173	119.167	1.07143	11153.3
104.441	120.378	113.573	1.13614	10130.7
131.461	144.079	139.316	1.17637	15243.8
109.521	135.402	128.084	1.43385	12884.9
177.549	202.457	194.674	1.20588	29764.9
163.004	176.879	171.489	1.10905	23097.4
102.689	127.084	117.554	1.45545	10853.3
116.315	131.663	127.132	1.14286	12694
66.4657	79.2839	75.7471	1.33333	4506.32
93.9967	101.492	98.5113	1.12097	7621.88
49.8493	70.0888	64.2789	1.70583	3245.09
88.621	105.127	100.647	1.21206	7955.94
151.205	217.828	199.844	1.77221	31367
67.8865	78.028	75.2297	1.19231	4444.96
101.545	108.394	105.242	1.09145	8699.03
52.2204	60.8882	58.0338	1.125	2645.16
140.995	186.226	170.015	1.59259	22702
158.561	171.478	166.063	1.15909	21659
159.272	181.738	174.5	1.22657	23915.5
125.532	137.72	133.656	1.18638	14030.3
57.4424	65.012	62.2204	1.09091	3040.57
94.1598	101.893	97.2253	1.09537	7424.18
122.985	135.355	129.198	1.1584	13109.9
158.779	180.974	171.565	1.17969	23117.9
46.9984	60.34	57.1293	1.33333	2563.35
78.3306	85.5174	82.8616	1.09911	5392.58
70.4975	82.4048	79.2199	1.22548	4929
101.83	114.36	110.001	1.18975	9503.49
100.914	121.275	115.543	1.32197	10485.2
148.828	164.357	153.26	1.11443	18448
81.2359	94.8498	90.0407	1.27273	6367.48
122.718	134.966	130.767	1.11035	13430.3
86.0452	100.721	95.5593	1.25705	7171.93
80.9416	95.2975	92.1371	1.22581	6667.44
88.1812	97.3387	94.3711	1.13408	6994.68
123.962	140.16	132.383	1.25804	13764.4
90.2275	113.483	107.809	1.39069	9128.53
70.4975	83.1942	78.7253	1.23341	4867.64
103.391	110.399	107.001	1.10714	8992.18
126.525	153.6	145.114	1.36274	16539.1
100.727	138.401	127.371	1.61694	12741.8
104.551	114.614	106.513	1.2116	8910.38
52.2204	63.5348	60.5231	1.2	2876.95
77.1305	88.7613	84.3669	1.26433	5590.29
54.8314	72.6375	67.8271	1.44214	3613.24
60.0535	81.5089	76.3179	1.53521	4574.49
33.9433	38.9279	36.916	1	1070.34
113.995	129.421	124.196	1.21526	12114.6
151.35	168.486	163.456	1.20987	20984
83.5526	91.2043	88.5338	1.06579	6156.14
65.2755	81.4191	76.715	1.47711	4622.21
135.773	160.047	151.809	1.30769	18100.3
95.2453	105.587	99.6938	1.16852	7805.95
91.3857	114.801	108.771	1.34286	9292.15
80.0029	84.6166	81.8604	1.09376	5263.05
112.274	121.584	117.628	1.06663	10867
88.8755	106.238	100.258	1.29897	7894.58
125.536	142.307	135.045	1.23887	14323.4
127.393	167.258	152.778	1.55072	18332.1
112.274	122.56	116.962	1.14906	10744.3
88.3248	123.344	111.529	1.72382	9769.37
99.3435	118.183	112.073	1.28609	9864.81
60.0535	69.0191	65.9453	1.13043	3415.53
155.294	189.511	180.491	1.41674	25585.8
83.5526	96.1616	93.1677	1.15625	6817.43
142.536	176.32	164.883	1.38099	21352.2
98.3308	112.29	104.912	1.22518	8644.5
127.049	150.17	140.031	1.36439	15400.6
82.9378	88.5134	84.9309	1.11105	5665.28
127.94	144.146	138.41	1.21355	15046.1
107.807	130.694	121.512	1.32551	11596.4
73.8508	81.2384	78.0609	1.17652	4785.83
106.079	127.506	118.62	1.29624	11051
125.329	139.749	132.318	1.23009	13750.7
134.362	169.26	155.453	1.45806	18979.7
91.3857	99.2638	95.5593	1.05714	7171.93
95.7788	102.391	99.0824	1.11831	7710.51
102.898	116.694	111.295	1.18896	9728.47
86.0833	111.433	102.696	1.52523	8283.17
60.0535	71.0561	67.8271	1.15867	3613.24
215.65	230.637	221.241	1.08487	38443.5
139.719	159.311	150.949	1.26071	17895.7
110.915	137.079	131.297	1.40079	13539.4
75.7196	90.3109	86.7511	1.2069	5910.71
64.6194	80.7472	76.2041	1.45946	4560.86
83.5526	97.1059	93.5396	1.24638	6871.96
83.0821	111.24	104.04	1.48889	8501.33
78.7375	90.9851	87.2997	1.26717	5985.7
148.879	164.233	155.034	1.16943	18877.5
62.6645	69.471	67.3132	1.08333	3558.7
94.1598	114.083	108.811	1.31373	9298.97
102.228	117.779	110.237	1.28243	9544.4
67.8865	73.0025	70.1547	1.13514	3865.48
46.1567	51.6979	49.2116	1.28	1902.06
67.8865	73.974	71.3204	1.09231	3995.01
100.41	115.498	109.13	1.20079	9353.51
110.483	137.297	126.207	1.35458	12510
128.799	153.253	145.473	1.199	16620.9
123.7	146.699	138.629	1.25373	15093.8
133.147	153.425	146.009	1.29974	16743.6
114.885	123.448	119.857	1.15873	11282.8
118.161	130.094	125.759	1.1875	12421.3
156.933	181.808	172.926	1.22353	23486
73.1086	83.6774	79.3294	1.14286	4942.63
59.4689	73.9653	69.8447	1.42916	3831.39
105.05	114.641	111.061	1.13634	9687.56
73.1086	87.4305	83.9544	1.25	5535.75
82.8909	86.4003	83.4358	1.05381	5467.58
136.478	158.035	147.664	1.23903	17125.4
128.267	149.977	143.732	1.25073	16225.5
74.2191	82.1736	79.1103	1.22002	4915.36
83.5526	91.836	88.5338	1.09711	6156.14
87.3514	110.689	103.873	1.43993	8474.06
233.015	272.634	259.535	1.27188	52903.2
104.441	129.801	122.295	1.33083	11746.4
86.2952	107.473	102.738	1.41822	8289.99
190.604	214.259	201.208	1.21918	31796.5
86.1637	91.2424	88.5828	1.10014	6162.95
86.1637	98.1504	93.725	1.18033	6899.23
98.9694	131.473	119.64	1.55366	11241.9
91.0908	121.173	113.764	1.52124	10164.8
139.513	163.314	156.566	1.25091	19252.4
130.589	152.294	144.545	1.32976	16409.5
145.77	164.796	159.695	1.22648	20029.6
117.431	136.49	130.833	1.20353	13444
79.695	106.528	97.3591	1.60678	7444.63
54.8314	64.9174	62.1506	1.23671	3033.75
161.883	172.237	163.509	1.1236	20997.7
121.854	133.698	125.759	1.12306	12421.3
140.958	157.183	149.62	1.2037	17582.1
85.3762	99.7158	92.607	1.26048	6735.62
215.179	236.782	221.77	1.16439	38627.5
39.1653	47.4405	44.9721	1.13333	1588.46
57.4424	67.1916	64.7499	1.21427	3292.82
88.7747	100.545	97.5817	1.17661	7478.72
198.921	228.913	213.047	1.31751	35648.3
117.609	146.005	136.069	1.43509	14541.6
68.14	104.317	94.0947	1.86794	6953.77
95.2014	102.532	99.6938	1.13627	7805.95
67.8865	82.3106	77.503	1.27267	4717.66
66.4657	75.4646	72.2275	1.27778	4097.27
136.624	145.576	140.155	1.10936	15427.8
111.368	145.122	134.691	1.52681	14248.4
117.496	133.955	127.881	1.22831	12844
108.897	120.209	115.468	1.14895	10471.6
96.6077	107.923	103.412	1.18919	8399.07
107.052	113.962	106.513	1.06106	8910.38
194.359	235.576	221.457	1.40148	38518.5
84.9284	111.864	104.788	1.45652	8624.04
152.748	167.846	163.163	1.20988	20909
112.274	123.479	115.317	1.14283	10444.3
75.6971	98.6026	92.607	1.5122	6735.62
80.1697	94.4044	89.1201	1.29402	6237.94
66.4657	74.8316	71.866	1.19444	4056.37
117.496	125.912	120.435	1.09789	11391.9
86.1637	91.7333	89.2175	1.09264	6251.58
91.3857	106.571	99.6067	1.20187	7792.32
149.548	172.692	166.037	1.2963	21652.1
72.9779	87.5846	84.0577	1.33866	5549.38
117.496	128.352	123.811	1.10453	12039.6
132.162	182.899	166.533	1.67172	21781.7
137.382	191.661	177.288	1.60581	24685.9
99.6986	116.749	110.983	1.26556	9673.93
110.266	123.772	119.712	1.17243	11255.6
125.329	135.17	127.371	1.10587	12741.8
136.624	166.618	159.15	1.35303	19893.2
78.3306	89.8287	87.1006	1.18708	5958.43
88.7747	102.033	97.8039	1.18704	7512.8
237.603	259.714	249.648	1.18737	48949.1
60.0535	68.6599	65.6816	1.18458	3388.26
99.2188	125.387	118.363	1.35929	11003.3
143.269	157.812	148.251	1.05748	17261.7
101.83	114.375	109.09	1.13829	9346.69
110.292	142.625	132.219	1.48394	13730.3
100.654	135.794	125.897	1.56147	12448.6
73.1086	79.1649	76.715	1.09558	4622.21
147.454	197.631	182.499	1.4871	26158.5
65.2755	77.3279	74.3009	1.24	4335.88
66.129	79.4153	74.8827	1.36441	4404.06
119.572	134.242	128.929	1.18988	13055.4
88.7747	100.056	97.0018	1.17338	7390.09
89.9704	96.9381	93.2142	1.16327	6824.24
99.0085	128.779	119.712	1.57588	11255.6
139.363	174.592	161.855	1.46651	20575
131.085	162.907	148.66	1.45126	17357.2
149.548	188.06	177.875	1.4321	24849.5
109.663	128.791	120.867	1.19535	11473.7
152.954	176.516	165.251	1.16949	21447.6
107.052	116.829	113.916	1.10124	10192.1
104.776	115.907	112.459	1.16569	9932.99
98.0177	115.509	111.1	1.27005	9694.38
88.7747	120.993	113.535	1.55882	10123.9
137.89	168.048	160.373	1.33632	20200
129.749	140.404	136.006	1.10625	14527.9
193.057	230.241	213.921	1.33428	35941.5
79.8432	104.547	97.0018	1.5895	7390.09
203.66	247.238	233.31	1.41026	42752.1
128.156	166.778	153.515	1.40516	18509.3
107.612	138.49	129.466	1.45629	13164.4
86.1637	100.659	95.7408	1.16407	7199.2
86.1637	96.0624	93.1211	1.15152	6810.61
88.621	95.3244	91.4278	1.07182	6565.18
148.831	170.287	164.909	1.21458	21359
93.0492	116.37	108.451	1.40465	9237.61
111.32	125.603	119.821	1.19138	11276
134.778	155.585	148.543	1.19264	17329.9
119.231	150.981	141.419	1.48548	15707.3
138.142	185.502	173.927	1.58099	23758.7
99.6986	110.475	107.001	1.16667	8992.18
103.384	133.822	125.171	1.5656	12305.5
83.5526	94.2405	90.5693	1.18962	6442.47
72.9894	94.446	88.19	1.48854	6108.41
101.545	110.026	104.663	1.12727	8603.59
114.885	148.199	136.133	1.50671	14555.2
124.709	150.094	144.214	1.33771	16334.6
104.441	115.547	111.295	1.07307	9728.47
75.7196	84.145	80.6318	1.08889	5106.25
85.8684	105.106	100.085	1.39106	7867.31
68.312	79.3653	75.8616	1.25031	4519.95
93.8111	104.366	98.2024	1.23084	7574.16
122.145	152.262	140.464	1.433	15496
116.924	136.016	130.235	1.30826	13321.2
148.828	163.408	155.565	1.20163	19007
96.006	115.587	109.447	1.28846	9408.05
96.5852	110.783	106.023	1.24528	8828.57
148.9	198.649	183.495	1.55576	26444.8
169.069	191.125	185.635	1.18632	27065.2
146.217	176.803	169.862	1.32143	22661.1
159.494	182.906	174.226	1.26119	23840.5
114.885	133.752	128.22	1.26316	12912.2
105.891	130.028	122.861	1.3773	11855.5
104.728	127.675	119.313	1.41709	11180.6
82.5044	89.4423	85.9973	1.09971	5808.45
64.4107	81.2	75.8044	1.49652	4513.14
130.551	146.861	142.306	1.21141	15905.1
107.475	157.986	145.682	1.75361	16668.6
116.315	132.287	123.214	1.2381	11923.7
77.9864	91.4739	88.19	1.26279	6108.41
73.5006	86.7726	82.8616	1.30374	5392.58
88.7747	101.968	96.3734	1.23325	7294.65
150.825	160.593	150.517	1.10932	17793.5
108.93	125.865	119.749	1.28241	11262.4
134.778	146.524	138.159	1.08219	14991.5
96.006	105.091	100.991	1.15552	8010.47
143.606	157.029	152.009	1.14836	18148
96.6077	113.655	107.729	1.34301	9114.9
115.523	142.395	134.948	1.30639	14303
57.4424	71.8693	68.5906	1.27273	3695.04
179.732	208.592	199.888	1.31073	31380.6
154.05	177.035	168.399	1.25424	22272.5
73.8508	79.0292	75.9759	1.06935	4533.59
117.303	135.972	129.131	1.16763	13096.3
121.84	127.584	123.987	1.08835	12073.7
120.107	132.82	125.897	1.15217	12448.6
184.298	210.539	200.3	1.2	31510.1
270.68	307.459	291.393	1.27279	66688.1
171.257	222.536	207.578	1.52311	33841.7
121.5	136.563	129.433	1.23056	13157.6
169.559	189.163	179.042	1.20896	25176.8
95.4009	103.722	100.215	1.12118	7887.76
86.7747	108.812	103.076	1.44681	8344.53
162.435	185.108	176.749	1.12311	24535.9
91.9548	118.744	109.05	1.53098	9339.87
178.734	199.371	185.822	1.17096	27119.7
83.0821	99.1173	94.3711	1.31111	6994.68
80.0605	88.5375	84.8798	1.22727	5658.46
70.4975	81.5328	77.7825	1.17041	4751.75
101.545	112.076	109.13	1.2	9353.51
135.773	168.087	159.695	1.36538	20029.6
60.0535	66.7649	64.2114	1.14706	3238.28
83.5526	94.6967	91.6649	1.18729	6599.27
169.871	190.341	183.685	1.12627	26499.3
111.228	128.22	121.225	1.28514	11541.9
138.384	151.107	140.68	1.15094	15543.7
39.1653	45.6303	43.5004	1.07773	1486.2
102.268	140.312	128.186	1.72924	12905.4
90.4672	112.078	101.677	1.46939	8119.55
94.1598	113.621	105.859	1.41176	8801.3
107.688	134.637	126.585	1.46044	12585
126.611	150.043	143.127	1.33113	16089.1
117.496	133.263	128.861	1.20856	13041.7
67.8865	78.792	75.7471	1.19668	4506.32
68.312	74.9041	72.3476	1.18919	4110.91
118.161	141.283	134.981	1.34375	14309.8
112.785	155.93	143.49	1.70194	16170.9
148.355	180.507	165.54	1.46099	21522.6
94.6065	117.422	111.139	1.42481	9701.2
133.162	137.527	133.233	1.03867	13941.6
162.15	198.611	186.754	1.39584	27392.4
77.5433	90.4859	87.0507	1.24942	5951.61
168.732	190.621	180.707	1.21799	25647.2
105.237	140.872	127.132	1.57895	12694
86.1637	91.0411	87.0507	1.07812	5951.61
125.546	132.101	127.473	1.07908	12762.2
180.16	220.25	202.819	1.34783	32307.8
109.779	137.141	128.118	1.4033	12891.8
127.077	162.955	151.838	1.35851	18107.1
33.9433	38.9279	36.916	1	1070.34
157.14	180.601	172.876	1.31175	23472.4
161.391	194.516	186.359	1.24189	27276.5
101.83	116.629	113.19	1.18745	10062.5
88.621	114.905	108.651	1.41667	9271.7
174.204	206.694	195.985	1.30661	30167.1
129.663	137.867	132.547	1.0806	13798.5
123.7	167.215	149.301	1.6494	17507.1
82.2695	94.2642	90.1852	1.22387	6387.93
65.2755	71.8362	69.4709	1.13514	3790.49
140.007	166.848	160.427	1.38171	20213.7
135.773	156.981	151.38	1.17308	17998
151.439	183.37	169.99	1.39675	22695.2
86.7747	108.354	102.865	1.3617	8310.44
70.1583	76.8705	73.8321	1.14753	4281.34
101.83	109.373	105.818	1.13388	8794.48
132.641	169.439	158.577	1.55214	19750.1
182.771	216.9	203.503	1.30182	32525.9
96.006	108.819	104.248	1.23077	8535.42
75.6971	82.1698	78.5597	1.07405	4847.19
94.1598	112.232	107.365	1.37255	9053.54
107.447	130.542	123.952	1.37718	12066.8
133.435	145.919	140.248	1.15237	15448.3
101.545	126.323	120.147	1.30909	11337.4
65.2755	78.8181	74.9406	1.20467	4410.87
243.304	302.251	281.9	1.43159	62413.5
114.614	142.813	131.363	1.37676	13553
104.441	124.275	115.355	1.225	10451.1
106.625	121.157	115.242	1.14215	10430.7
131.085	159.182	151.866	1.37142	18113.9
78.3306	83.3612	81.0612	1.11773	5160.79
80.9416	93.543	89.5089	1.18465	6292.48
83.5526	98.7763	94.4171	1.25	7001.5
83.5526	97.128	93.1211	1.09375	6810.61
120.008	156.002	146.928	1.35385	16954.9
83.5526	90.2437	87.2499	1.04167	5978.88
113.625	131.304	126	1.20618	12469.1
170.81	191.459	182.856	1.2091	26260.7
36.5543	47.7793	44.9721	1.28571	1588.46
132.86	158.924	152.408	1.30717	18243.4
122.924	159.924	149.504	1.54279	17554.9
120.366	153.181	141.48	1.45583	15721
81.9798	100.638	94.2791	1.39235	6981.04
83.0821	102.552	97.8039	1.35556	7512.8
49.6094	60.7571	57.6587	1.22655	2611.07
161.088	199.916	187.195	1.43249	27521.9
105.656	138.541	126.79	1.55361	12625.9
52.2204	63.4574	60.5948	1.27501	2883.77
172.327	194.482	183.33	1.20444	26397.1
96.006	125.934	117.591	1.4616	10860.2
171.647	193.309	186.359	1.21794	27276.5
114.885	123.804	114.676	1.12909	10328.4
129.816	155.528	146.632	1.3263	16886.8
179.175	188.009	181.928	1.07196	25994.8
108.281	126.142	118.217	1.20585	10976.1
57.2344	61.4395	59.2183	1.14115	2754.24
109.663	123.817	118.18	1.08572	10969.2
99.6986	135.754	123.496	1.54399	11978.2
78.4331	91.0568	87.1006	1.27357	5958.43
44.3873	52.6716	50.2588	1.11765	1983.87
65.2755	77.8411	73.8908	1.37167	4288.16
90.4672	104.326	97.7595	1.22449	7505.99
80.9416	85.9018	82.5993	1.05179	5358.5
108.93	136.152	127.779	1.33992	12823.6
140.995	154.275	149.997	1.12963	17670.8
65.2755	73.3746	70.4017	1.08	3892.75
73.447	90.1552	85.1351	1.38842	5692.55
127.502	166.6	153.345	1.55919	18468.4
49.6094	54.961	52.5386	1.06377	2167.94
183.056	202.427	190.208	1.15117	28415
57.4424	64.6731	62.4988	1.09091	3067.84
182.781	201.605	195.364	1.15471	29976.2
69.0797	83.9064	79.2747	1.39966	4935.82
66.4657	74.7701	71.9867	1.22222	4070
153.24	166.862	161.129	1.1102	20390.9
118.161	142.496	134.755	1.35938	14262.1
91.3857	102.916	98.8192	1.12266	7669.6
79.3896	91.3879	88.1408	1.26037	6101.6
99.2188	108.808	105.736	1.15162	8780.84
88.7747	96.0007	91.7122	1.10862	6606.09
140.176	161.085	152.38	1.3056	18236.6
78.3306	86.6295	82.7044	1.1674	5372.13
150.241	172.02	163.509	1.32565	20997.7
75.7196	96.3613	90.2333	1.37931	6394.75
158.779	191.124	180.081	1.3937	25469.9
182.771	199.775	189.477	1.14751	28196.9
99.2188	106.349	101.335	1.08868	8065.01
120.107	152.059	141.296	1.43478	15680.1
172.56	234.573	215.86	1.6711	36595.9
54.8314	63.6854	61.236	1.15174	2945.13
120.107	151.425	144.305	1.3913	16355
130.275	143.898	137.213	1.19542	14787
96.7276	105.139	99.8243	1.16714	7826.4
46.9984	54.1026	51.8736	1.11356	2113.4
198.347	217.265	206.509	1.17181	33494
164.979	193.406	178.848	1.35459	25122.2
114.469	126.804	122.046	1.22581	11698.7
176.919	220.469	206.404	1.4721	33459.9
57.4424	65.2564	62.983	1.09091	3115.56
135.99	171.511	159.232	1.4762	19913.7
151.394	193.218	179.864	1.56097	25408.5
146.662	176.63	167.702	1.36589	22088.5
155.514	203.841	189.316	1.43883	28149.1
140.433	168.081	155.397	1.40277	18966.1
91.4396	96.7787	92.841	1.03535	6769.7
89.7315	100.935	95.5139	1.23605	7165.11
49.6094	59.9717	56.9772	1.16489	2549.72
57.2344	64.5546	61.9407	1.25806	3013.3
184.627	208.672	197.001	1.2863	30480.7
164.678	182.055	172.75	1.15154	23438.3
88.1549	100.456	95.6501	1.16426	7185.57
120.008	130.015	124.406	1.10417	12155.5
97.8523	110.834	106.513	1.24528	8910.38
110.32	136.066	129.734	1.25544	13219
91.3857	96.2266	92.9812	1.04512	6790.16
153.069	182.382	171.008	1.38095	22967.9
97.2215	110.376	104.081	1.21956	8508.15
171.48	204.524	185.612	1.38885	27058.4
105.81	133.17	125.414	1.42599	12353.2
99.6986	113.206	109.169	1.19718	9360.33
88.621	118.617	111.49	1.45833	9762.55
101.83	119.283	113.916	1.15435	10192.1
107.052	119.834	115.204	1.21587	10423.8
44.3873	52.9841	50.345	1.25561	1990.69
87.6865	111.354	102.611	1.4073	8269.54
84.6292	101.883	93.9563	1.33093	6933.32
70.1583	81.8484	77.6149	1.3318	4731.29
146.191	159.687	152.977	1.14621	18379.8
111.239	141.104	130.867	1.37942	13450.8
107.084	119.428	114.827	1.16286	10355.7
75.7196	80.4854	75.9188	1.05006	4526.77
91.3857	97.5324	94.1869	1.13129	6967.41
216.591	252.722	236.782	1.27764	44033.8
208.198	244.861	228.593	1.38374	41040.9
99.6986	110.539	105.531	1.16667	8746.76
220.507	258.806	243.362	1.28443	46515.3
41.7763	47.981	45.927	1.07387	1656.63
71.3787	92.3568	84.7775	1.49491	5644.83
102.098	134.411	124.406	1.38913	12155.5
163.518	176.11	169.862	1.14643	22661.1
135.773	145.199	139.409	1.09063	15264.2
138.249	174.792	163.376	1.46988	20963.6
114.407	121.738	118.033	1.08856	10942
83.0821	88.257	84.9309	1.04403	5665.28
96.6077	119.557	111.724	1.24324	9803.46
65.2755	70.6167	68.0826	1.12359	3640.51
168.36	212.807	201.057	1.48636	31748.8
62.6645	69.2334	66.6002	1.08543	3483.7
79.3896	89.0741	85.0841	1.16279	5685.73
105.209	126.351	119.821	1.29825	11276
88.7747	96.5832	93.586	1.09355	6878.78
130.551	136.99	131.66	1.08	13614.4
159.261	215.028	198.559	1.57454	30964.7
130.551	157.544	147.576	1.3736	17104.9
105.618	131.881	119.676	1.4373	11248.8
41.7763	51.4962	48.6796	1.25193	1861.16
144.751	162.29	152.806	1.17471	18338.9
138.384	147.152	142.641	1.05785	15980
162.815	192.675	178.727	1.23366	25088.1
77.9704	95.5235	89.751	1.36543	6326.57
167.105	204.484	191.867	1.37573	28912.7
174.543	186.42	181.832	1.11287	25967.6
168.58	199.892	185.635	1.35397	27065.2
60.0535	65.9669	63.1894	1.14706	3136.02
75.6971	87.9234	82.3362	1.31707	5324.41
120.107	154.133	142.275	1.45694	15898.2
159.272	191.354	176.084	1.33258	24351.8
46.9984	54.6834	52.5386	1.11111	2167.94
187.887	224.028	206.74	1.36047	33569
99.2188	110.862	107.527	1.14446	9080.81
86.1637	120.94	111.801	1.60606	9817.09
114.036	125.499	120.651	1.15526	11432.8
142.624	175.251	164.277	1.37717	21195.4
218.184	237.077	220.199	1.12799	38082.1
136.217	162.243	150.546	1.35356	17800.3
125.329	141.63	132.874	1.21318	13866.6
93.9967	103.082	99.3012	1.06211	7744.6
172.148	201.282	187.728	1.31349	27678.7
129.724	137.772	133.688	1.09115	14037.1
57.061	69.3918	65.8795	1.40251	3408.71
57.2344	63.9815	61.023	1.22581	2924.68
86.7747	115.753	107.325	1.61702	9046.72
80.9416	105.593	98.6434	1.4353	7642.33
65.2755	72.8655	70.0928	1.11737	3858.66
139.581	153.878	149.852	1.22217	17636.7
138.47	149.161	144.905	1.09333	16491.4
73.1086	79.6428	76.3748	1.14133	4581.31
198.068	227.351	219.903	1.25646	37979.9
49.6094	58.5483	56.133	1.15789	2474.73
180.934	226.286	212.761	1.45918	35552.9
103.391	113.696	107.527	1.18572	9080.81
115.441	125.493	121.225	1.10953	11541.9
132.931	151.968	144.184	1.25	16327.7
109.476	160.067	145.622	1.65267	16655
88.7254	98.8478	95.1953	1.2188	7117.39
130.515	153.218	142.092	1.31863	15857.3
86.7747	109.131	102.738	1.45352	8289.99
54.9757	67.0972	63.1207	1.43701	3129.2
96.6077	127.493	118.29	1.47754	10989.7
65.2755	70.5058	67.891	1.04984	3620.05
70.4975	79.3148	76.2041	1.20784	4560.86
88.621	109.639	103.454	1.41891	8405.89
101.83	110.937	107.527	1.13267	9080.81
67.8865	74.3717	71.1377	1.04914	3974.56
121.69	143.627	138.033	1.28587	14964.2
110.776	133.352	128.794	1.35	13028.1
70.4975	76.2	73.9495	1.12821	4294.98
96.3867	115.954	109.209	1.36251	9367.14
158.361	168.349	163.323	1.12119	20949.9
96.006	101.438	98.4232	1.10372	7608.25
195.18	236.372	222.454	1.39119	38866.1
141.865	158.97	152.294	1.25413	18216.2
161.883	196.818	180.226	1.40323	25510.8
197.863	219.598	209.782	1.22368	34564.3
112.757	125.605	116.478	1.22925	10655.6
67.8865	80.0329	76.0901	1.22068	4547.22
56.1614	68.0288	64.4812	1.36762	3265.55
62.6645	76.6422	73.5376	1.25	4247.26
72.0045	97.4046	90.2333	1.61538	6394.75
130.551	152.422	147.399	1.24026	17064
54.8314	63.7365	61.1651	1.15625	2938.31
134.622	157.664	151.351	1.22393	17991.2
183.429	222.695	205.835	1.28801	33275.9
131.085	158.297	146.839	1.26449	16934.5
46.9984	53.7933	51.2846	1.05556	2065.68
62.2175	70.932	67.9549	1.24803	3626.87
131.259	172.339	158.549	1.56915	19743.3
70.1583	81.5669	78.3384	1.23684	4819.92
169.142	213.36	199.736	1.36995	31332.9
82.0887	90.2596	87.0009	1.13773	5944.79
112.622	129.786	123.952	1.2	12066.8
54.8314	63.5349	60.2356	1.07689	2849.68
127.94	147.114	140.124	1.18931	15421
73.1086	90.6843	86.6008	1.32143	5890.26
65.423	82.498	77.2786	1.52018	4690.39
86.5362	96.5257	92.841	1.2091	6769.7
57.4424	64.1084	61.7302	1.07306	2992.85
60.0535	71.5573	68.464	1.17391	3681.41
151.834	166.262	158.467	1.09379	19722.8
67.8865	74.8612	72.1072	1.08017	4083.64
212.919	229.289	213.067	1.08324	35655.1
161.883	193.625	182.784	1.33871	26240.3
84.0064	132.369	117.738	1.90931	10887.4
88.7747	97.1927	92.841	1.13714	6769.7
116.353	125.1	121.261	1.04607	11548.7
44.3873	50.3317	48.3216	1.05882	1833.89
82.5683	108.441	100.776	1.56518	7976.39
125.546	135.076	131.065	1.19118	13491.7
163.536	182.084	171.742	1.22839	23165.6
53.8254	72.3784	66.4044	1.55539	3463.25
113.059	125.216	119.313	1.09483	11180.6
44.3873	49.7912	47.5977	1.03704	1779.35
140.994	152.9	147.517	1.12584	17091.3
110.861	126.176	120.723	1.19232	11446.5
78.1963	107.516	98.0698	1.61654	7553.71
110.785	146.303	135.302	1.51255	14378
133.876	143.339	135.622	1.0957	14446.1
221.677	235.609	231.611	1.11817	42131.7
112.274	130.041	123.32	1.27907	11944.1
71.9678	82.4536	78.5597	1.2707	4847.19
106.959	116.903	112.034	1.0457	9858
67.8865	77.1724	73.7144	1.21053	4267.71
132.931	178.617	165.409	1.5872	21488.5
114.885	141.196	133.688	1.41463	14037.1
88.7747	108.546	102.78	1.32353	8296.81
138.983	163.402	155.704	1.28948	19041.1
86.7747	97.3283	94.1869	1.21277	6967.41
116.315	146.709	137.023	1.46032	14746.1
140.135	184.304	169.478	1.60297	22558.9
101.066	124.459	119.386	1.35849	11194.2
86.1637	94.8556	92.2783	1.11834	6687.89
131.996	158.574	148.192	1.37996	17248.1
151.297	167.217	159.804	1.16581	20056.9
127.94	159.802	145.354	1.45268	16593.6
127.94	138.03	133.721	1.08225	14043.9
158.779	194.688	180.875	1.31395	25694.9
155.082	183.332	172.02	1.26666	23240.6
74.9552	81.8708	79.3841	1.19376	4949.45
81.9157	96.9553	90.2814	1.37344	6401.56
64.6194	70.4226	67.891	1.14286	3620.05
158.996	184.585	178.581	1.15344	25047.2
138.609	152.697	144.515	1.15051	16402.7
104.927	113.88	109.764	1.09524	9462.59
147.501	162.415	153.571	1.08701	18522.9
131.344	173.359	160.751	1.52356	20295.5
99.0978	115.205	110.159	1.21551	9530.76
137.831	143.665	139.565	1.07143	15298.3
185.665	210.279	197.66	1.09878	30685.2
71.4764	79.7707	76.5451	1.22056	4601.76
102.282	107.559	102.23	1.08915	8208.18
82.9194	101.948	94.3711	1.37714	6994.68
71.5622	83.5173	79.8203	1.35664	5003.99
109.504	142.374	130.368	1.54156	13348.5
59.5398	78.4798	73.1826	1.49225	4206.35
143.513	154.183	149.33	1.1209	17514
112.059	144.046	136.642	1.40247	14664.3
168.815	193.39	186.917	1.26297	27440.1
132.805	162.317	152.152	1.42671	18182.1
116.594	172.642	157.836	1.84651	19566
62.6645	69.2333	65.8795	1.09536	3408.71
51.6956	59.8254	57.0533	1.29807	2556.53
72.0045	76.1196	73.6555	1.07692	4260.89
67.6716	88.4215	82.0722	1.55055	5290.32
49.6094	56.2051	54.0854	1.10526	2297.47
138.547	178.645	165.172	1.48255	21427.2
144.981	151.15	143.188	1.0675	16102.8
75.6971	82.3943	79.548	1.10054	4969.9
127.94	154.52	144.815	1.26024	16470.9
57.4424	63.5142	61.236	1.10629	2945.13
128.144	153.563	140.927	1.36195	15598.3
72.2013	92.5986	87.647	1.45498	6033.42
54.8314	63.7599	60.8093	1.16137	2904.22
96.3645	113.901	105.366	1.34164	8719.49
75.3602	91.1348	86.1486	1.40309	5828.9
123.252	157.58	145.711	1.50662	16675.4
70.9975	79.4086	75.8616	1.18407	4519.95
49.6094	56.8677	54.1656	1.27529	2304.29
146.932	161.999	157.009	1.21039	19361.5
102.688	114.418	110.473	1.18044	9585.3
103.391	114.835	110.08	1.19643	9517.13
41.7763	48.6158	46.3035	1.07692	1683.9
60.0535	69.0006	66.4044	1.09932	3463.25
175.383	216.681	201.94	1.40889	32028.3
108.152	120.697	114.751	1.18182	10342
80.9416	87.1988	84.5211	1.13821	5610.74
105.215	130.572	120.435	1.33758	11391.9
97.2543	115.218	108.811	1.37443	9298.97
112.274	133.158	125.31	1.14085	12332.7
80.9416	99.6565	93.9101	1.36712	6926.5
93.9967	116.491	110.67	1.30556	9619.39
154.05	179.531	167.546	1.33898	22047.6
153.048	169.094	162.23	1.10744	20670.4
70.4975	77.8189	74.1254	1.13782	4315.43
86.1637	109.109	103.538	1.33333	8419.52
205.138	237.583	227.394	1.28503	40611.4
83.0422	95.1192	91.1902	1.21357	6531.09
135.773	142.278	138.472	1.0709	15059.7
65.2755	69.2858	66.7954	1.08333	3504.16
83.4848	90.3085	86.901	1.07078	5931.16
123.7	141.746	134.045	1.26866	14112.1
133.708	161.43	149.417	1.3584	17534.4
148.84	171.408	159.15	1.2163	19893.2
152.47	203.214	186.963	1.62506	27453.8
65.2755	96.8965	88.0422	1.64	6087.96
75.7628	87.8327	84.006	1.26477	5542.57
78.917	105.391	98.7314	1.58562	7655.97
161.677	184.086	173.652	1.12245	23683.7
114.469	122.594	117.443	1.05405	10832.9
62.6645	70.4282	68.0188	1.08333	3633.69
70.4975	93.7676	84.3669	1.64474	5590.29
78.3306	91.2606	87.647	1.23189	6033.42
95.6734	106.288	102.06	1.15008	8180.91
119.959	154.543	144.485	1.55385	16395.9
65.2755	78.5981	74.3592	1.24598	4342.7
62.6645	66.683	64.6828	1.05714	3286
176.995	208.96	198.777	1.24241	31032.9
75.6971	82.1968	79.1103	1.12195	4915.36
60.0535	67.9609	64.5485	1.24242	3272.36
65.2755	73.3876	70.2783	1.12173	3879.12
65.2755	77.034	73.4194	1.16	4233.62
120.632	148.181	141.173	1.38538	15652.8
205.936	217.774	210.547	1.12186	34816.6
148.828	159.612	152.294	1.08728	18216.2
155.087	165.928	159.396	1.07782	19954.6
155.084	177.068	166.794	1.20659	21849.8
153.192	159.748	155.202	1.06738	18918.4
162.901	188.906	172.8	1.27885	23451.9
133.921	170.285	159.178	1.58292	19900.1
126.477	141.26	135.43	1.22084	14405.2
107.052	130.828	120.651	1.3883	11432.8
106.468	128.538	120.363	1.2737	11378.3
62.6645	71.3494	68.6539	1.125	3701.86
137.343	148.522	142.732	1.20359	16000.5
67.8865	73.9523	71.9264	1.03846	4063.19
85.9399	96.0869	92.607	1.14906	6735.62
101.322	125.238	116.068	1.4004	10580.6
104.441	118.335	109.962	1.22343	9496.67
33.9433	38.9279	36.916	1	1070.34
110.329	120.639	114.676	1.07937	10328.4
178.776	196.027	183.282	1.1248	26383.4
129.136	163.756	153.486	1.45322	18502.5
98.9693	136.466	126.79	1.58849	12625.9
70.4975	77.2208	74.8827	1.07407	4404.06
112.274	149.355	140.649	1.46512	15536.9
79.3896	84.1805	80.9541	1.06496	5147.16
113.995	124.072	120.435	1.14194	11391.9
104.406	110.388	106.554	1.09579	8917.19
84.9284	91.5165	88.3375	1.16198	6128.87
117.496	144.814	138.001	1.28889	14957.4
75.7196	86.2159	82.0722	1.2455	5290.32
70.4975	75.5617	72.6469	1.09718	4144.99
138.47	169.042	156.344	1.41671	19197.9
124.753	135.769	131.032	1.13228	13484.9
80.9416	91.0605	85.3896	1.1119	5726.64
126.766	133.18	129.231	1.09723	13116.7
83.5526	90.4409	87.7954	1.0625	6053.87
90.9555	106.178	101.249	1.3	8051.38
62.6645	67.151	63.9405	1.14706	3211.01
232.275	280.269	260.836	1.2533	53435
60.0535	66.4336	64.2114	1.09034	3238.28
193.122	217.067	209.824	1.19042	34578
155.274	198.6	186.452	1.34933	27303.8
79.741	96.8359	93.0745	1.32385	6803.79
69.1543	76.4978	73.5966	1.21847	4254.07
75.7196	85.323	82.3362	1.08889	5324.41
187.993	204.394	189.362	1.10585	28162.8
99.2188	114.059	107.527	1.21053	9080.81
116.646	127.567	118.62	1.12575	11051
97.8039	115.014	108.451	1.28273	9237.61
65.2755	70.0544	67.9549	1.08597	3626.87
228.921	282.706	265.225	1.38561	55248.4
60.0535	69.8352	66.7954	1.28918	3504.16
107.052	116.069	112.266	1.10795	9898.9
83.0821	92.8516	89.9442	1.13333	6353.84
46.9984	53.457	51.2846	1.07566	2065.68
49.6094	58.635	55.6672	1.28571	2433.82
137.655	169.929	157.836	1.44505	19566
70.1583	79.1158	75.8044	1.21053	4513.14
143.606	154.191	150.055	1.07273	17684.4
121.854	142.141	137.339	1.24242	14814.3
114.469	122.428	118.656	1.11364	11057.9
155.028	172.304	166.037	1.17647	21652.1
79.3896	86.5071	81.3285	1.18605	5194.88
144.003	159.65	152.095	1.25076	18168.4
73.8508	90.2883	85.8964	1.35	5794.81
106.178	111.585	106.92	1.06897	8978.55
84.1506	101.886	96.5983	1.35829	7328.73
99.6986	107.514	103.37	1.05556	8392.25
70.1583	73.1926	70.1547	1.07219	3865.48
127.94	161.033	152.863	1.42857	18352.5
101.83	110.073	105.572	1.06897	8753.57
121.854	153.421	146.098	1.34848	16764
64.1257	85.7817	79.929	1.56264	5017.63
157.684	178.63	170.677	1.29131	22879.3
46.9984	54.7778	52.0406	1.24117	2127.04
120.107	130.153	124.301	1.13286	12135
97.0937	108.981	104.331	1.17651	8549.05
154.05	172.234	161.021	1.23522	20363.6
49.6094	55.8587	53.5208	1.17857	2249.75
77.5433	80.8287	78.3384	1.04894	4819.92
96.6077	100.806	97.3591	1.04852	7444.63
97.8523	123.64	116.292	1.45283	10621.5
104.823	127.567	116.999	1.4386	10751.1
88.7747	111.807	106.187	1.39596	8855.84
100.727	113.908	109.13	1.21458	9353.51
164.192	175.053	169.017	1.09255	22436.1
113.249	132.264	123.425	1.31086	11964.6
125.772	142.914	137.813	1.14638	14916.5
132.313	161.01	150.546	1.36676	17800.3
187.407	201.667	194.54	1.12971	29724
107.084	118.122	112.034	1.14546	9858
73.1086	99.8262	94.1409	1.46429	6960.59
41.7763	48.8607	46.3035	1.06919	1683.9
124.347	145.086	136.229	1.28571	14575.7
154.05	173.028	167.96	1.18705	22156.6
60.0535	86.1473	79.4934	1.56522	4963.09
110.776	136.009	129.332	1.4	13137.2
83.5526	95.9073	91.9013	1.16148	6633.35
127.94	146.52	138.848	1.26531	15141.5
51.6956	64.7375	61.1651	1.42857	2938.31
83.5526	89.1506	86.6509	1.06516	5897.07
155.087	175.5	167.028	1.10783	21911.2
108.645	115.959	110.787	1.16575	9639.84
112.738	142.612	134.045	1.43746	14112.1
143.429	154.884	149.417	1.11104	17534.4
92.3135	109.34	104.995	1.2	8658.13
138.672	191.414	175.319	1.61098	24140.5
133.162	148.343	140.927	1.13352	15598.3
170.792	225.951	209.927	1.5109	34612.1
73.1086	78.4076	75.8044	1.15	4513.14
83.5526	92.1034	88.9739	1.16613	6217.49
112.106	121.289	115.618	1.18664	10498.8
49.8493	56.4859	53.9247	1.25926	2283.84
73.1086	81.6612	78.1165	1.10975	4792.65
75.7196	96.0779	90.5214	1.35313	6435.65
169.716	180.556	174.351	1.09677	23874.6
175.396	216.126	201.725	1.40276	31960.1
135.582	148.181	139.316	1.14061	15243.8
84.7425	91.2256	88.9739	1.1291	6217.49
54.8314	61.6728	59.2183	1.09707	2754.24
49.6094	56.5068	54.1656	1.10557	2304.29
67.8865	74.0731	71.0766	1.07692	3967.74
163.527	216.306	198.406	1.57535	30917
140.995	165.807	156.705	1.26328	19286.5
133.162	156.348	144.635	1.2656	16430
84.9284	103.293	96.148	1.3913	7260.56
152.103	158.405	155.062	1.04808	18884.3
140.995	159.257	154.473	1.22222	18741.1
132.799	140.684	136.069	1.08709	14541.6
123.335	142.213	134.401	1.25095	14187.1
110.776	116.767	112.613	1.06667	9960.26
138.47	157.699	151.236	1.12	17963.9
107.052	122.683	117.11	1.21138	10771.5
73.447	81.2557	78.1165	1.19132	4792.65
133.374	168.274	154.389	1.45655	18720.7
107.052	114.178	106.432	1.12069	8896.74
88.7747	106.314	100.776	1.22079	7976.39
94.622	123.502	115.58	1.50333	10492
123.7	150.297	142.58	1.29851	15966.4
129.239	146.846	141.081	1.22857	15632.4
105.667	116.439	112.575	1.20411	9953.44
90.9446	111.242	103.663	1.36194	8439.97
108.51	136.964	127.507	1.40678	12769
213.134	223.153	218.815	1.03153	37604.9
121.17	137.65	130.867	1.27547	13450.8
166.141	184.542	171.515	1.18875	23104.3
120.008	144.934	138.096	1.308	14977.9
112.274	120.773	116.366	1.09524	10635.2
41.7763	47.2925	45.0685	1.04913	1595.28
110.257	123.407	116.18	1.17142	10601.1
138.625	172.292	163.03	1.40087	20875
84.3019	92.771	88.9739	1.21413	6217.49
210.267	272.316	253.289	1.50743	50387.6
101.83	112.512	108.01	1.0881	9162.62
154.692	171.011	166.611	1.16436	21802.1
93.9967	117.975	108.451	1.47222	9237.61
113.133	148.876	139.689	1.50616	15325.6
73.0781	80.1621	77.5589	1.1754	4724.48
105.702	117.384	112.227	1.14286	9892.08
120.401	151.354	140.927	1.41974	15598.3
109.607	149.535	135.013	1.64513	14316.6
92.3135	104.866	100.776	1.17354	7976.39
91.3857	125.736	117.147	1.54286	10778.3
187.206	221.783	210.113	1.33649	34673.4
127.94	132.504	128.861	1.03419	13041.7
108.93	137.839	129.701	1.42373	13212.2
101.545	111.23	106.513	1.12191	8910.38
122.718	151.42	140.155	1.38298	15427.8
148.879	169.681	159.668	1.17253	20022.8
119.667	140.817	134.271	1.2624	14159.8
174.938	199.542	186.754	1.21942	27392.4
188.096	222.112	206.761	1.30738	33575.8
101.83	109.945	107.042	1.11936	8999
57.4424	63.2983	60.5948	1.09436	2883.77
165.53	190.78	182.166	1.29429	26063
69.8665	85.5871	78.8905	1.37158	4888.09
110.05	131.699	123.179	1.32155	11916.9
112.305	127.015	122.33	1.20064	11753.2
141.42	188.509	177.043	1.58382	24617.7
145.26	178.378	165.435	1.38705	21495.3
137.333	165.363	156.427	1.3738	19218.3
169.263	179.676	170.015	1.08944	22702
75.7196	80.2402	77.6708	1.05857	4738.11
55.9737	67.8033	64.0083	1.42604	3217.82
106.728	115.529	111.956	1.15166	9844.36
134.003	156.04	146.78	1.34602	16920.8
84.9284	107.864	101.034	1.48987	8017.29
96.5521	118.035	112.691	1.25645	9973.89
104.708	128.034	118.327	1.36678	10996.5
80.9416	100.708	96.0576	1.33099	7246.92
118.161	140.159	131.726	1.28715	13628
57.4424	61.0393	59.0715	1.03125	2740.61
109.366	116.859	112.652	1.11073	9967.08
112.274	125.447	120.183	1.18582	11344.2
109.251	124.737	115.355	1.30189	10451.1
133.367	159.518	148.573	1.35532	17336.7
107.052	125.104	118.473	1.24421	11023.8
191.632	212.02	198.055	1.14512	30807.9
164.106	234.953	216.763	1.71723	36902.7
106.101	132.833	121.046	1.483	11507.8
73.8508	93.4685	88.2392	1.5	6115.23
110.504	149.862	137.529	1.51411	14855.2
78.3306	89.9712	85.9973	1.1793	5808.45
132.931	139.859	136.006	1.06981	14527.9
113.007	131.418	124.511	1.33109	12175.9
216.181	251.028	237.111	1.25824	44156.5
73.1086	82.6636	79.7115	1.22168	4990.36
169.716	213.362	196.692	1.41054	30385.3
125.689	188.505	171.008	1.80121	22967.9
209.895	230.721	214.65	1.14545	36186.9
126.562	146.146	138.096	1.21648	14977.9
78.5345	95.4754	90.3294	1.39535	6408.38
103.372	131.109	124.441	1.41233	12162.3
140.317	154.249	148.368	1.10738	17289
72.0045	81.9501	78.1721	1.23366	4799.47
67.8865	75.7958	72.5273	1.11422	4131.36
126.808	172.294	158.248	1.68056	19668.3
108.93	124.378	117.517	1.23729	10846.5
57.4424	64.0141	61.8004	1.0803	2999.67
110.776	119.4	116.18	1.10233	10601.1
54.8314	65.1786	62.2901	1.1732	3047.39
127.407	138.23	133.526	1.15714	14003
117.496	143.599	133.037	1.31111	13900.7
76.9153	87.9753	84.8798	1.26445	5658.46
156.279	201.42	186.684	1.48089	27372
52.2204	58.474	55.9782	1.14201	2461.09
114.115	129.97	122.826	1.25118	11848.7
67.8865	72.7268	70.4017	1.12404	3892.75
46.9984	68.1113	62.0807	1.61309	3026.94
86.9412	114.723	105.077	1.50296	8671.77
156.813	171.202	163.482	1.1954	20990.9
138.384	159.576	153.43	1.24528	18488.9
174.444	187.778	180.394	1.04421	25558.5
218.045	234.234	218.716	1.14773	37570.8
80.013	91.4622	86.7511	1.23462	5910.71
41.7763	46.9536	44.5844	1.16667	1561.19
101.049	121.793	113.992	1.3775	10205.7
127.473	153.364	146.247	1.35908	16798.1
226.509	247.764	232.919	1.16791	42608.9
102.987	112.665	106.757	1.17314	8951.28
137.036	148.894	142.671	1.15036	15986.9
143.606	184.783	170.982	1.42755	22961.1
46.9984	52.1418	49.8251	1.11111	1949.78
97.8523	113.054	108.01	1.31989	9162.62
96.6077	112.876	108.731	1.24324	9285.33
70.4975	80.452	77.5589	1.15653	4724.48
111.789	136.032	130.202	1.35117	13314.4
94.1598	102.798	99.6067	1.13725	7792.32
99.2188	104.971	100.085	1.1043	7867.31
89.6012	95.6313	92.1842	1.07938	6674.26
182.771	208.683	199.213	1.28274	31169.3
83.5526	112.395	101.42	1.44481	8078.65
155.91	176.552	165.041	1.25688	21393.1
82.8934	93.1838	89.751	1.19118	6326.57
111.635	161.871	147.928	1.68595	17186.7
88.2089	105.972	100.171	1.31238	7880.94
99.2188	105.717	102.611	1.10526	8269.54
107.052	120.737	117.295	1.14634	10805.6
166.741	207.381	196.714	1.40229	30392.1
96.6077	102.235	98.9509	1.06948	7690.06
195.347	213.308	207.39	1.16364	33780.3
62.6645	69.6708	67.6349	1.08333	3592.78
163.112	220.379	205.666	1.66567	33221.3
52.2204	67.6136	63.1894	1.36393	3136.02
139.44	159.673	149.33	1.21064	17514
108.923	141.197	130.468	1.52581	13369
114.885	129.789	125.759	1.15909	12421.3
186.554	199.143	192.002	1.05884	28953.6
172.058	186.855	176.847	1.14895	24563.2
52.2204	59.1111	55.3545	1.30338	2406.55
112.274	127.389	122.295	1.11628	11746.4
169.857	184.388	168.862	1.11957	22395.2
93.7947	109.065	104.58	1.32583	8589.96
108.93	150.39	140.155	1.57627	15427.8
129.239	155.573	147.605	1.34627	17111.7
82.9689	94.3103	89.8477	1.23545	6340.21
131.623	145.615	136.229	1.20426	14575.7
[truncated: 6,442 more rows]

## Sheet: Venator
No.	Name	Feret (min)	Area	Aspect	Feret (max)
		(Values)	(Values)	(Values)	(Values)
1	mask_01623-05-001_0,png	0.0771144	0.0048374	1.02723	0.0829383
2	mask_01623-05-001_1,png	0.0970149	0.00844592	1.0806	0.110984
3	mask_01623-05-001_10,png	0.111346	0.0109451	1.15792	0.130363
10	mask_01623-05-001_11,png	0.235319	0.0493386	1.13519	0.276042
20	mask_01623-05-001_12,png	0.12739	0.0139212	1.0635	0.143155
29	mask_01623-05-001_13,png	0.0882504	0.00782057	1.17896	0.110663
35	mask_01623-05-001_14,png	0.079602	0.00576506	1.1748	0.0965284
43	mask_01623-05-001_15,png	0.124033	0.0132355	1.08666	0.140776
50	mask_01623-05-001_16,png	0.07895	0.0068437	1.32209	0.107269
57	mask_01623-05-001_17,png	0.126297	0.0140345	1.10473	0.141875
62	mask_01623-05-001_18,png	0.0995025	0.00983001	1.17352	0.122959
63	mask_01623-05-001_19,png	0.10199	0.0100374	1.14933	0.123442
64	mask_01623-05-001_2,png	0.113515	0.0113668	1.13329	0.12956
65	mask_01623-05-001_20,png	0.121891	0.0130508	1.06763	0.138809
66	mask_01623-05-001_21,png	0.164179	0.0233238	1.04608	0.179909
67	mask_01623-05-001_22,png	0.0671642	0.00403653	1.13349	0.0777153
68	mask_01623-05-001_23,png	0.0882504	0.00692008	1.13754	0.101874
69	mask_01623-05-001_24,png	0.0995025	0.00913147	1.10544	0.115254
70	mask_01623-05-001_25,png	0.0689017	0.00516359	1.30445	0.0957635
71	mask_01623-05-001_26,png	0.196124	0.0364096	1.17191	0.245776
72	mask_01623-05-001_27,png	0.185006	0.0327224	1.21505	0.234826
73	mask_01623-05-001_28,png	0.155666	0.0230652	1.23332	0.193797
74	mask_01623-05-001_29,png	0.0970149	0.00835145	1.1719	0.1151
75	mask_01623-05-001_3,png	0.161692	0.0221995	1.03191	0.177229
76	mask_01623-05-001_30,png	0.112407	0.0110282	1.17418	0.133348
77	mask_01623-05-001_31,png	0.123837	0.0146254	1.2486	0.157251
78	mask_01623-05-001_33,png	0.161692	0.0269963	1.32177	0.215536
79	mask_01623-05-001_34,png	0.0895522	0.00669099	1.01455	0.0986998
80	mask_01623-05-001_35,png	0.142779	0.0170885	1.05359	0.154423
81	mask_01623-05-001_36,png	0.16857	0.0256891	1.10694	0.19311
82	mask_01623-05-001_37,png	0.0746269	0.00567151	1.30545	0.0998868
83	mask_01623-05-001_38,png	0.119368	0.0162687	1.44436	0.173749
84	mask_01623-05-001_39,png	0.114428	0.0122886	1.17848	0.137317
85	mask_01623-05-001_4,png	0.0920398	0.00747889	1.11119	0.105154
86	mask_01623-05-001_40,png	0.0945274	0.0081685	1.11013	0.109696
87	mask_01623-05-001_41,png	0.100563	0.00841049	1.01585	0.110046
88	mask_01623-05-001_42,png	0.151266	0.0262854	1.4263	0.222851
89	mask_01623-05-001_43,png	0.136502	0.0189458	1.3113	0.183506
90	mask_01623-05-001_44,png	0.19403	0.0312368	1.06602	0.213761
91	mask_01623-05-001_45,png	0.128707	0.0145358	1.10779	0.146766
92	mask_01623-05-001_46,png	0.149542	0.0188079	1.10182	0.170111
93	mask_01623-05-001_47,png	0.0929224	0.00833965	1.2398	0.116483
94	mask_01623-05-001_48,png	0.0845771	0.00577676	1.02552	0.0902371
95	mask_01623-05-001_49,png	0.0771144	0.0068202	1.35116	0.11149
96	mask_01623-05-001_5,png	0.158844	0.0279547	1.44502	0.230911
97	mask_01623-05-001_50,png	0.116915	0.01236	1.14006	0.142023
98	mask_01623-05-001_51,png	0.148179	0.0216767	1.21821	0.184145
99	mask_01623-05-001_52,png	0.0771144	0.00556631	1.14727	0.0930235
100	mask_01623-05-001_53,png	0.0917683	0.00748478	1.16617	0.109696
101	mask_01623-05-001_54,png	0.0771144	0.00605182	1.2478	0.102019
102	mask_01623-05-001_55,png	0.0895522	0.00897771	1.25969	0.120887
103	mask_01623-05-001_56,png	0.0771144	0.00558969	1.25	0.0986998
104	mask_01623-05-001_57,png	0.128683	0.0184542	1.42783	0.188895
105	mask_01623-05-001_58,png	0.0924033	0.00828062	1.2732	0.11661
106	mask_01623-05-001_59,png	0.103273	0.0104288	1.21151	0.130409
107	mask_01623-05-001_6,png	0.0862475	0.00609868	1.07271	0.0951782
108	mask_01623-05-001_60,png	0.0845771	0.00657946	1.14556	0.102653
109	mask_01623-05-001_62,png	0.132225	0.0201155	1.51726	0.201508
110	mask_01623-05-001_63,png	0.148055	0.0185561	1.07438	0.166865
111	mask_01623-05-001_64,png	0.134328	0.0152704	1.04968	0.14646
112	mask_01623-05-001_65,png	0.126866	0.0181845	1.3419	0.181459
113	mask_01623-05-001_67,png	0.114428	0.0134739	1.25692	0.151168
114	mask_01623-05-001_68,png	0.0870496	0.00699648	1.21018	0.106827
115	mask_01623-05-001_69,png	0.0597015	0.00337303	1.13852	0.0730963
116	mask_01623-05-001_7,png	0.236318	0.049551	1.06633	0.263866
117	mask_01623-05-001_70,png	0.109609	0.0140882	1.52106	0.168798
118	mask_01623-05-001_71,png	0.0894343	0.00922021	1.44437	0.135126
119	mask_01623-05-001_72,png	0.156837	0.0222897	1.22991	0.191338
120	mask_01623-05-001_74,png	0.0808867	0.00665577	1.34691	0.11077
121	mask_01623-05-001_75,png	0.141083	0.0177951	1.19613	0.170922
122	mask_01623-05-001_76,png	0.133472	0.0146134	1.06519	0.146848
123	mask_01623-05-001_77,png	0.132225	0.0154198	1.1731	0.159279
124	mask_01623-05-001_78,png	0.0820896	0.00642691	1.20639	0.104138
125	mask_01623-05-001_79,png	0.156716	0.0212863	1.02983	0.17677
126	mask_01623-05-001_8,png	0.0845027	0.00640932	1.14759	0.0989681
127	mask_01623-05-001_82,png	0.146537	0.0188618	1.16673	0.174406
128	mask_01623-05-001_83,png	0.0722475	0.00500624	1.29597	0.0953017
129	mask_01623-05-001_85,png	0.0970149	0.00808591	1.08891	0.112363
130	mask_01623-05-001_86,png	0.0373134	0.001507	1.28828	0.0511468
131	mask_01623-05-001_89,png	0.109453	0.00990704	1.04581	0.11883
132	mask_01623-05-001_9,png	0.109453	0.0134203	1.36188	0.152608
133	mask_01623-05-001_90,png	0.0820896	0.0058177	1.0615	0.0940911
134	mask_01623-05-001_92,png	0.0995025	0.00806231	1.03291	0.105435
135	mask_01623-05-001_96,png	0.0698573	0.00479086	1.30746	0.0923264
136	mask_01623-05-001_97,png	0.0995025	0.00974115	1.23951	0.127778
138	mask_01623-05-002_0,png	0.0920398	0.00731996	1.01428	0.103026
139	mask_01623-05-002_1,png	0.0808867	0.00643864	1.21771	0.101294
140	mask_01623-05-002_10,png	0.126866	0.0130865	1.01019	0.135412
141	mask_01623-05-002_100,png	0.121891	0.014697	1.26343	0.158713
148	mask_01623-05-002_11,png	0.131828	0.0151688	1.13286	0.148872
157	mask_01623-05-002_12,png	0.0935273	0.00800334	1.16867	0.111834
165	mask_01623-05-002_13,png	0.135058	0.0152286	1.08493	0.147762
175	mask_01623-05-002_14,png	0.200825	0.0334535	1.09253	0.221844
182	mask_01623-05-002_15,png	0.0784602	0.0052919	1.11397	0.0888953
191	mask_01623-05-002_16,png	0.158609	0.0237328	1.15227	0.189055
199	mask_01623-05-002_17,png	0.0597015	0.0028855	1.05255	0.0644096
201	mask_01623-05-002_18,png	0.211378	0.0407187	1.18452	0.254173
202	mask_01623-05-002_19,png	0.0689017	0.0042624	1.13494	0.0820896
203	mask_01623-05-002_2,png	0.0920398	0.00829243	1.19749	0.115691
204	mask_01623-05-002_20,png	0.135046	0.0170885	1.20089	0.164252
205	mask_01623-05-002_21,png	0.106669	0.0110698	1.20359	0.132044
206	mask_01623-05-002_22,png	0.151741	0.0218089	1.10652	0.177958
207	mask_01623-05-002_23,png	0.133984	0.0150374	1.07267	0.146909
208	mask_01623-05-002_24,png	0.0671642	0.00511113	1.37447	0.0953017
209	mask_01623-05-002_25,png	0.0721393	0.00462806	1.06145	0.0809449
210	mask_01623-05-002_26,png	0.126866	0.0159099	1.16541	0.156122
211	mask_01623-05-002_27,png	0.0721152	0.00491307	1.25534	0.0919121
212	mask_01623-05-002_28,png	0.0882504	0.00786773	1.25549	0.11448
213	mask_01623-05-002_29,png	0.101221	0.0130627	1.55407	0.160817
214	mask_01623-05-002_3,png	0.0935273	0.00772039	1.10439	0.106965
215	mask_01623-05-002_30,png	0.0746269	0.00460481	1.05807	0.0823734
216	mask_01623-05-002_31,png	0.141265	0.0162987	1.0524	0.152549
217	mask_01623-05-002_32,png	0.121671	0.0118246	1.04785	0.130819
218	mask_01623-05-002_33,png	0.0870647	0.00690833	1.11843	0.104732
219	mask_01623-05-002_35,png	0.0945274	0.00961086	1.30135	0.127264
220	mask_01623-05-002_36,png	0.10071	0.00895406	1.15988	0.118755
221	mask_01623-05-002_37,png	0.126399	0.0151569	1.22152	0.15786
222	mask_01623-05-002_38,png	0.17444	0.0271108	1.17398	0.210698
223	mask_01623-05-002_39,png	0.156716	0.0236907	1.22259	0.197146
224	mask_01623-05-002_4,png	0.124378	0.015145	1.18317	0.159806
225	mask_01623-05-002_40,png	0.186567	0.0289015	1.05188	0.207052
226	mask_01623-05-002_41,png	0.124527	0.0170526	1.46517	0.182667
227	mask_01623-05-002_42,png	0.149254	0.0226203	1.2448	0.190643
228	mask_01623-05-002_43,png	0.114635	0.0120625	1.18315	0.140073
229	mask_01623-05-002_44,png	0.131625	0.0175735	1.32254	0.17865
230	mask_01623-05-002_46,png	0.0986335	0.00872354	1.10767	0.11448
231	mask_01623-05-002_47,png	0.0820896	0.00684957	1.26396	0.108311
232	mask_01623-05-002_48,png	0.126866	0.0151987	1.25386	0.160424
233	mask_01623-05-002_49,png	0.0899349	0.00709643	1.21505	0.108584
234	mask_01623-05-002_5,png	0.0945274	0.00735527	1.0135	0.100856
235	mask_01623-05-002_50,png	0.115457	0.0146015	1.38091	0.165672
236	mask_01623-05-002_51,png	0.14469	0.0193176	1.11453	0.17811
237	mask_01623-05-002_52,png	0.226368	0.046227	1.15958	0.278651
238	mask_01623-05-002_53,png	0.0920398	0.00781468	1.2197	0.112363
239	mask_01623-05-002_54,png	0.0771144	0.00517525	1.02923	0.0851625
240	mask_01623-05-002_55,png	0.0721393	0.00436678	1.05141	0.0786455
241	mask_01623-05-002_56,png	0.0820896	0.00701412	1.38619	0.116177
242	mask_01623-05-002_57,png	0.121891	0.0135932	1.20325	0.151919
243	mask_01623-05-002_58,png	0.0845771	0.00613382	1.03403	0.0951473
244	mask_01623-05-002_59,png	0.141791	0.0200135	1.21858	0.179474
245	mask_01623-05-002_6,png	0.162324	0.0219411	1.05584	0.177636
246	mask_01623-05-002_60,png	0.0864914	0.00728466	1.21468	0.108965
247	mask_01623-05-002_62,png	0.192493	0.0328553	1.20559	0.228299
248	mask_01623-05-002_63,png	0.136816	0.0160654	1.12788	0.158864
249	mask_01623-05-002_64,png	0.167989	0.0249424	1.20061	0.205867
250	mask_01623-05-002_65,png	0.158187	0.0216407	1.15418	0.18232
251	mask_01623-05-002_66,png	0.221932	0.0446507	1.22845	0.277963
252	mask_01623-05-002_68,png	0.0995025	0.0124552	1.57674	0.158713
253	mask_01623-05-002_69,png	0.0847325	0.00697885	1.20065	0.109696
254	mask_01623-05-002_7,png	0.139303	0.0192156	1.12959	0.171484
255	mask_01623-05-002_70,png	0.0895522	0.00776163	1.17015	0.111967
256	mask_01623-05-002_73,png	0.0951473	0.00755544	1.06777	0.105435
257	mask_01623-05-002_74,png	0.049553	0.00221974	1.14246	0.0592213
258	mask_01623-05-002_75,png	0.106576	0.0100019	1.13471	0.123442
259	mask_01623-05-002_76,png	0.106965	0.0104406	1.13392	0.128637
260	mask_01623-05-002_77,png	0.115974	0.0118186	1.17474	0.139903
261	mask_01623-05-002_78,png	0.121891	0.0143508	1.24632	0.156333
262	mask_01623-05-002_8,png	0.202584	0.0348496	1.10766	0.225524
263	mask_01623-05-002_80,png	0.114428	0.0114203	1.055	0.129859
264	mask_01623-05-002_81,png	0.0696517	0.00463387	1.19295	0.0862543
265	mask_01623-05-002_82,png	0.129353	0.0164123	1.26302	0.168603
266	mask_01623-05-002_83,png	0.177976	0.0326681	1.3053	0.238768
267	mask_01623-05-002_84,png	0.137069	0.0168611	1.19853	0.168692
268	mask_01623-05-002_85,png	0.0959188	0.00852268	1.20009	0.115793
269	mask_01623-05-002_86,png	0.0829735	0.00700824	1.31382	0.110984
270	mask_01623-05-002_87,png	0.0870647	0.00744946	1.16082	0.106411
271	mask_01623-05-002_88,png	0.108497	0.0138794	1.48686	0.166161
272	mask_01623-05-002_89,png	0.11194	0.010957	1.22697	0.140606
273	mask_01623-05-002_9,png	0.0970149	0.00838687	1.09372	0.110261
274	mask_01623-05-002_91,png	0.0694543	0.004948	1.33132	0.0949308
275	mask_01623-05-002_92,png	0.0759376	0.00501789	1.15491	0.0902371
276	mask_01623-05-002_93,png	0.0522388	0.00225936	1.01541	0.0564631
277	mask_01623-05-002_94,png	0.0422886	0.00169092	1.13084	0.051859
278	mask_01623-05-002_95,png	0.0870647	0.00701412	1.13403	0.104251
279	mask_01623-05-002_96,png	0.167266	0.023805	1.04247	0.185417
280	mask_01623-05-002_97,png	0.0917683	0.00721406	1.09683	0.104506
281	mask_01623-05-002_99,png	0.11906	0.013462	1.2053	0.145312
282	mask_01623-05-003_0,png	0.146321	0.0227526	1.34005	0.199202
283	mask_01623-05-003_1,png	0.12343	0.0138436	1.14953	0.144693
284	mask_01623-05-003_10,png	0.0970149	0.00874127	1.19329	0.116992
285	mask_01623-05-003_100,png	0.0995025	0.0081567	1.01726	0.106827
286	mask_01623-05-003_102,png	0.0717854	0.00493054	1.19058	0.0885321
287	mask_01623-05-003_103,png	0.150898	0.0187359	1.23121	0.180261
288	mask_01623-05-003_104,png	0.159204	0.0244128	1.24814	0.205896
289	mask_01623-05-003_105,png	0.179138	0.0326801	1.35908	0.24724
290	mask_01623-05-003_106,png	0.153301	0.0202535	1.14353	0.178667
291	mask_01623-05-003_107,png	0.132745	0.0198095	1.48395	0.195532
292	mask_01623-05-003_108,png	0.0920398	0.00759078	1.13539	0.109155
293	mask_01623-05-003_109,png	0.101693	0.0090605	1.17701	0.122159
294	mask_01623-05-003_11,png	0.205398	0.0360044	1.02766	0.227555
295	mask_01623-05-003_110,png	0.168681	0.0257312	1.13296	0.202449
296	mask_01623-05-003_111,png	0.179024	0.0265444	1.09398	0.202911
297	mask_01623-05-003_112,png	0.15685	0.0230352	1.18544	0.191731
298	mask_01623-05-003_113,png	0.0721393	0.00480831	1.19997	0.088499
299	mask_01623-05-003_114,png	0.11064	0.0115095	1.20047	0.135412
300	mask_01623-05-003_115,png	0.139104	0.0154078	1.0018	0.146521
301	mask_01623-05-003_116,png	0.10199	0.00954573	1.20299	0.12526
302	mask_01623-05-003_117,png	0.136309	0.0160295	1.08456	0.155622
303	mask_01623-05-003_118,png	0.0771144	0.00514027	1.06004	0.0854709
305	mask_01623-05-003_12,png	0.0970453	0.00972338	1.27456	0.126466
316	mask_01623-05-003_13,png	0.152063	0.0229931	1.24118	0.192312
326	mask_01623-05-003_14,png	0.144096	0.0190837	1.14836	0.168888
333	mask_01623-05-003_15,png	0.117107	0.0137065	1.2987	0.153137
338	mask_01623-05-003_16,png	0.154254	0.0234561	1.26455	0.197498
346	mask_01623-05-003_17,png	0.11149	0.013462	1.37691	0.154171
354	mask_01623-05-003_18,png	0.0696517	0.00445962	1.17024	0.0839183
364	mask_01623-05-003_19,png	0.201812	0.0472033	1.37997	0.28608
371	mask_01623-05-003_2,png	0.0945274	0.00776163	1.05821	0.106411
372	mask_01623-05-003_20,png	0.119912	0.0131521	1.21553	0.148872
377	mask_01623-05-003_21,png	0.0870647	0.00719053	1.1711	0.107434
386	mask_01623-05-003_22,png	0.155778	0.0260745	1.51684	0.231343
387	mask_01623-05-003_23,png	0.0646766	0.00351116	1.06609	0.0709669
388	mask_01623-05-003_24,png	0.186112	0.0295228	1.09068	0.211028
389	mask_01623-05-003_25,png	0.130466	0.0153003	1.14521	0.151247
390	mask_01623-05-003_26,png	0.120398	0.0124493	1.14361	0.140606
391	mask_01623-05-003_27,png	0.126948	0.014918	1.20236	0.155236
392	mask_01623-05-003_28,png	0.0771144	0.00655598	1.31439	0.105435
393	mask_01623-05-003_29,png	0.154108	0.0207758	1.10473	0.174354
394	mask_01623-05-003_3,png	0.1083	0.0102331	1.09003	0.121328
395	mask_01623-05-003_30,png	0.1	0.00880627	1.1399	0.117523
396	mask_01623-05-003_31,png	0.11086	0.00994259	1.04269	0.118529
397	mask_01623-05-003_32,png	0.109264	0.0116165	1.21055	0.14103
398	mask_01623-05-003_33,png	0.10199	0.0102568	1.17983	0.127987
399	mask_01623-05-003_34,png	0.126948	0.0134978	1.03197	0.140797
400	mask_01623-05-003_35,png	0.201407	0.0541159	1.63062	0.334739
401	mask_01623-05-003_36,png	0.104256	0.00969969	1.13872	0.121402
402	mask_01623-05-003_37,png	0.146457	0.0180767	1.04914	0.165291
403	mask_01623-05-003_38,png	0.161645	0.0257493	1.33547	0.214227
404	mask_01623-05-003_39,png	0.112455	0.0116878	1.13559	0.136379
405	mask_01623-05-003_4,png	0.197397	0.0410941	1.41002	0.285995
406	mask_01623-05-003_40,png	0.10199	0.0093563	1.08532	0.120023
407	mask_01623-05-003_41,png	0.0723348	0.00480831	1.17613	0.087601
408	mask_01623-05-003_42,png	0.104033	0.0110936	1.31195	0.138809
409	mask_01623-05-003_43,png	0.079602	0.00579431	1.09158	0.094434
410	mask_01623-05-003_44,png	0.155499	0.0233419	1.18565	0.191338
411	mask_01623-05-003_45,png	0.134328	0.0170346	1.13272	0.158713
412	mask_01623-05-003_46,png	0.11194	0.0119197	1.22228	0.138981
413	mask_01623-05-003_47,png	0.220998	0.0441779	1.17673	0.267274
414	mask_01623-05-003_48,png	0.170553	0.0246354	1.11047	0.195347
415	mask_01623-05-003_49,png	0.119403	0.0134382	1.05815	0.141875
416	mask_01623-05-003_5,png	0.109453	0.0114738	1.17253	0.131637
417	mask_01623-05-003_50,png	0.114482	0.0115927	1.11365	0.131297
418	mask_01623-05-003_51,png	0.124978	0.0150553	1.2542	0.156122
419	mask_01623-05-003_52,png	0.0870647	0.00642691	1.04448	0.0965589
420	mask_01623-05-003_53,png	0.154229	0.0208419	1.17131	0.187003
421	mask_01623-05-003_54,png	0.106255	0.0108145	1.17899	0.127778
422	mask_01623-05-003_55,png	0.0776119	0.0052744	1.17892	0.093055
423	mask_01623-05-003_56,png	0.0825447	0.00601669	1.12677	0.0957635
424	mask_01623-05-003_57,png	0.132225	0.0195875	1.43575	0.193843
425	mask_01623-05-003_59,png	0.106727	0.0103932	1.18237	0.127638
426	mask_01623-05-003_6,png	0.0845771	0.00636827	1.10533	0.0963148
427	mask_01623-05-003_60,png	0.150641	0.0180048	1.05923	0.163244
428	mask_01623-05-003_61,png	0.120398	0.0130448	1.21907	0.148892
429	mask_01623-05-003_62,png	0.133828	0.0176394	1.24033	0.168745
430	mask_01623-05-003_63,png	0.0689017	0.0041581	1.12386	0.0784232
431	mask_01623-05-003_64,png	0.115514	0.013158	1.29766	0.15245
432	mask_01623-05-003_66,png	0.108955	0.0106305	1.13893	0.127638
433	mask_01623-05-003_67,png	0.129353	0.0148582	1.14324	0.151662
434	mask_01623-05-003_68,png	0.0870647	0.00698473	1.13422	0.103026
435	mask_01623-05-003_69,png	0.14853	0.0195695	1.13657	0.171694
436	mask_01623-05-003_7,png	0.232722	0.0533022	1.27089	0.297005
437	mask_01623-05-003_70,png	0.079602	0.00592303	1.13101	0.0943406
438	mask_01623-05-003_71,png	0.14403	0.0215686	1.31305	0.189787
439	mask_01623-05-003_72,png	0.151674	0.0209439	1.20407	0.187196
440	mask_01623-05-003_73,png	0.0721393	0.00470944	1.15958	0.0867954
441	mask_01623-05-003_74,png	0.113692	0.0116937	1.20047	0.135412
442	mask_01623-05-003_75,png	0.178601	0.0521062	2.13388	0.374384
443	mask_01623-05-003_76,png	0.0864914	0.00937998	1.56869	0.140606
444	mask_01623-05-003_77,png	0.0693424	0.00441319	1.14798	0.0815549
445	mask_01623-05-003_78,png	0.201493	0.0338281	1.08684	0.222756
446	mask_01623-05-003_79,png	0.113879	0.0146373	1.42653	0.167548
447	mask_01623-05-003_8,png	0.213283	0.0436749	1.18901	0.25914
448	mask_01623-05-003_80,png	0.0724196	0.00500042	1.24317	0.0916243
449	mask_01623-05-003_82,png	0.165596	0.026189	1.23706	0.207926
450	mask_01623-05-003_83,png	0.0870647	0.00735527	1.23563	0.113204
451	mask_01623-05-003_84,png	0.0895522	0.00715524	1.09279	0.102797
452	mask_01623-05-003_85,png	0.21232	0.0448629	1.27943	0.278225
453	mask_01623-05-003_87,png	0.116452	0.0145597	1.39393	0.165672
454	mask_01623-05-003_88,png	0.0964439	0.00855221	1.16481	0.115357
455	mask_01623-05-003_89,png	0.0597015	0.00343056	1.17554	0.0746657
456	mask_01623-05-003_9,png	0.137421	0.0184422	1.26148	0.17444
457	mask_01623-05-003_90,png	0.180963	0.0267252	1.02131	0.195532
458	mask_01623-05-003_91,png	0.106965	0.0121101	1.24219	0.137773
459	mask_01623-05-003_92,png	0.0917683	0.00795616	1.18762	0.111967
460	mask_01623-05-003_94,png	0.0951764	0.0110817	1.56017	0.149914
461	mask_01623-05-003_95,png	0.144279	0.0189098	1.23325	0.178448
462	mask_01623-05-003_96,png	0.0895522	0.00672622	1.09399	0.101497
463	mask_01623-05-003_97,png	0.144279	0.0184542	1.14113	0.174302
464	mask_01623-05-003_98,png	0.158819	0.0211601	1.18867	0.179926
465	mask_01623-05-004_0,png	0.0912906	0.00707879	1.08846	0.101294
466	mask_01623-05-004_1,png	0.106965	0.0106305	1.17753	0.130956
467	mask_01623-05-004_10,png	0.0995025	0.00855221	1.12785	0.11448
478	mask_01623-05-004_11,png	0.124378	0.0129555	1.0855	0.13827
486	mask_01623-05-004_12,png	0.191932	0.03175	1.11631	0.213478
495	mask_01623-05-004_13,png	0.11194	0.0103694	1.08098	0.12476
502	mask_01623-05-004_14,png	0.0970149	0.00880627	1.13836	0.116534
506	mask_01623-05-004_15,png	0.146766	0.0200735	1.14214	0.17677
514	mask_01623-05-004_16,png	0.108173	0.0116105	1.26701	0.139924
517	mask_01623-05-004_17,png	0.146747	0.0196415	1.14039	0.170235
518	mask_01623-05-004_18,png	0.129353	0.0165439	1.21485	0.160406
519	mask_01623-05-004_19,png	0.144962	0.0189338	1.13719	0.168246
520	mask_01623-05-004_2,png	0.079602	0.00612796	1.13433	0.0958249
521	mask_01623-05-004_20,png	0.116915	0.0128185	1.22252	0.144299
522	mask_01623-05-004_21,png	0.250953	0.0550148	1.0872	0.282519
523	mask_01623-05-004_22,png	0.0671427	0.00385728	1.10801	0.0774154
524	mask_01623-05-004_23,png	0.134328	0.0167833	1.17578	0.158713
525	mask_01623-05-004_24,png	0.109453	0.0110698	1.21902	0.137165
526	mask_01623-05-004_25,png	0.115172	0.0130031	1.25244	0.14562
527	mask_01623-05-004_26,png	0.0909058	0.00867036	1.26157	0.121695
528	mask_01623-05-004_27,png	0.107599	0.0106483	1.13425	0.125616
529	mask_01623-05-004_29,png	0.106965	0.0101441	1.13628	0.12808
530	mask_01623-05-004_3,png	0.181931	0.0293599	1.08826	0.211671
531	mask_01623-05-004_30,png	0.222497	0.0448932	1.20767	0.274308
532	mask_01623-05-004_31,png	0.114064	0.0106898	1.0418	0.121988
533	mask_01623-05-004_32,png	0.0995025	0.00875899	1.16662	0.118103
534	mask_01623-05-004_33,png	0.162576	0.0232937	1.1413	0.187791
535	mask_01623-05-004_34,png	0.0995025	0.0089245	1.1005	0.116483
536	mask_01623-05-004_35,png	0.118509	0.0138317	1.3102	0.154869
537	mask_01623-05-004_36,png	0.0696517	0.00415231	1.06426	0.0778274
538	mask_01623-05-004_37,png	0.159204	0.0250388	1.24352	0.203298
539	mask_01623-05-004_38,png	0.0945274	0.00774985	1.063	0.105966
540	mask_01623-05-004_39,png	0.11194	0.0132355	1.28529	0.15085
541	mask_01623-05-004_4,png	0.135941	0.0155931	1.09382	0.154423
542	mask_01623-05-004_40,png	0.0890952	0.00731996	1.16023	0.104732
543	mask_01623-05-004_41,png	0.139261	0.0183163	1.25464	0.17463
544	mask_01623-05-004_42,png	0.165854	0.0223197	1.04162	0.178583
545	mask_01623-05-004_43,png	0.0845771	0.00578846	1.04552	0.0911105
546	mask_01623-05-004_44,png	0.0951473	0.0090605	1.24623	0.121891
547	mask_01623-05-004_45,png	0.0829735	0.00567735	1.05685	0.0907556
548	mask_01623-05-004_46,png	0.128707	0.0166456	1.24464	0.165672
549	mask_01623-05-004_47,png	0.0812145	0.00604597	1.20423	0.102019
550	mask_01623-05-004_48,png	0.124072	0.0155154	1.22595	0.158088
551	mask_01623-05-004_49,png	0.120694	0.0142553	1.17959	0.150234
552	mask_01623-05-004_5,png	0.163928	0.0292694	1.28117	0.214156
553	mask_01623-05-004_50,png	0.135323	0.0167055	1.21109	0.165944
554	mask_01623-05-004_51,png	0.164309	0.0241179	1.22275	0.196579
555	mask_01623-05-004_52,png	0.0920398	0.00742591	1.11299	0.109155
556	mask_01623-05-004_53,png	0.107599	0.0117532	1.40698	0.148227
557	mask_01623-05-004_54,png	0.157262	0.0215085	1.00204	0.182716
558	mask_01623-05-004_55,png	0.0646766	0.00405968	1.22932	0.0809449
559	mask_01623-05-004_56,png	0.0917683	0.00875899	1.3732	0.127708
560	mask_01623-05-004_57,png	0.162256	0.0248883	1.18931	0.202076
561	mask_01623-05-004_58,png	0.121891	0.0157186	1.23518	0.158619
562	mask_01623-05-004_59,png	0.0689539	0.00444801	1.23133	0.0867954
563	mask_01623-05-004_6,png	0.0935273	0.00747301	1.11001	0.106272
564	mask_01623-05-004_60,png	0.135599	0.0185501	1.29149	0.174578
565	mask_01623-05-004_61,png	0.156716	0.0229871	1.23875	0.20023
566	mask_01623-05-004_62,png	0.109453	0.0106127	1.07806	0.125355
567	mask_01623-05-004_63,png	0.122886	0.0144284	1.24375	0.155622
568	mask_01623-05-004_64,png	0.103192	0.0124017	1.52667	0.158562
569	mask_01623-05-004_65,png	0.0696517	0.00495383	1.15833	0.0874672
570	mask_01623-05-004_66,png	0.128707	0.0137303	1.07707	0.143385
571	mask_01623-05-004_67,png	0.130069	0.016502	1.29714	0.17108
572	mask_01623-05-004_68,png	0.0528734	0.00251476	1.14568	0.0620045
573	mask_01623-05-004_69,png	0.121261	0.0140047	1.16313	0.146337
574	mask_01623-05-004_7,png	0.0724196	0.00475596	1.15637	0.086356
575	mask_01623-05-004_70,png	0.0995025	0.00848134	1.0264	0.111064
576	mask_01623-05-004_71,png	0.0671642	0.00434938	1.17168	0.0832545
577	mask_01623-05-004_72,png	0.0870647	0.00737882	1.18176	0.107269
578	mask_01623-05-004_73,png	0.128707	0.0131998	1.02362	0.136838
579	mask_01623-05-004_74,png	0.141812	0.0190657	1.20523	0.178919
580	mask_01623-05-004_75,png	0.128707	0.0143269	1.08568	0.147438
581	mask_01623-05-004_76,png	0.0680096	0.00387462	1.0959	0.0757462
582	mask_01623-05-004_77,png	0.0770837	0.00624515	1.32884	0.10521
583	mask_01623-05-004_78,png	0.0995025	0.00887129	1.13463	0.11883
584	mask_01623-05-004_79,png	0.114903	0.0135872	1.34726	0.15786
585	mask_01623-05-004_8,png	0.181767	0.0321667	1.2474	0.229925
586	mask_01623-05-004_80,png	0.0646766	0.00484904	1.37796	0.0943406
587	mask_01623-05-004_81,png	0.120887	0.0147627	1.37292	0.167816
588	mask_01623-05-004_82,png	0.100967	0.0106305	1.26036	0.135831
589	mask_01623-05-004_86,png	0.152819	0.0191856	1.07962	0.165727
590	mask_01623-05-004_87,png	0.0776966	0.00566566	1.17922	0.0936842
591	mask_01623-05-004_88,png	0.0560028	0.00463387	1.79684	0.106272
592	mask_01623-05-004_89,png	0.131841	0.0148224	1.09643	0.148872
593	mask_01623-05-004_9,png	0.0820896	0.00589376	1.04331	0.090367
594	mask_01623-05-004_91,png	0.0895522	0.00687895	1.12335	0.105491
595	mask_01623-05-004_94,png	0.129353	0.0150434	1.1624	0.157803
601	mask_01623-05-005_0,png	0.187875	0.0315749	1.09883	0.211028
602	mask_01623-05-005_1,png	0.155728	0.0211782	1.0911	0.173159
603	mask_01623-05-005_10,png	0.0820896	0.00705527	1.28015	0.108311
608	mask_01623-05-005_11,png	0.17412	0.026912	1.19857	0.217589
618	mask_01623-05-005_12,png	0.079602	0.00551958	1.10686	0.0917843
624	mask_01623-05-005_13,png	0.131135	0.0148821	1.09226	0.152765
633	mask_01623-05-005_14,png	0.10398	0.009676	1.12267	0.120221
641	mask_01623-05-005_15,png	0.0952863	0.00866445	1.20252	0.118604
649	mask_01623-05-005_16,png	0.106965	0.00988334	1.04805	0.119701
656	mask_01623-05-005_17,png	0.153188	0.0262733	1.34463	0.212242
664	mask_01623-05-005_18,png	0.153139	0.0211902	1.15144	0.180728
668	mask_01623-05-005_2,png	0.136816	0.0183403	1.19009	0.170658
669	mask_01623-05-005_20,png	0.189577	0.0432507	1.51714	0.290291
670	mask_01623-05-005_21,png	0.0920398	0.0081449	1.18338	0.114142
671	mask_01623-05-005_23,png	0.0671427	0.00369562	1.04899	0.0722996
672	mask_01623-05-005_24,png	0.186412	0.0329459	1.19299	0.226301
673	mask_01623-05-005_25,png	0.131841	0.0166217	1.2628	0.168264
674	mask_01623-05-005_26,png	0.119309	0.0144463	1.31737	0.157689
675	mask_01623-05-005_27,png	0.079602	0.00540862	1.01734	0.0881674
676	mask_01623-05-005_28,png	0.0665256	0.00360911	1.08913	0.0751306
677	mask_01623-05-005_29,png	0.0935273	0.00762023	1.10532	0.106411
678	mask_01623-05-005_3,png	0.146766	0.0211481	1.19864	0.181077
679	mask_01623-05-005_30,png	0.121891	0.0126219	1.06868	0.13455
680	mask_01623-05-005_32,png	0.246361	0.0587513	1.28484	0.321465
681	mask_01623-05-005_33,png	0.138513	0.017825	1.15946	0.164197
682	mask_01623-05-005_34,png	0.133984	0.0172262	1.24364	0.17463
683	mask_01623-05-005_35,png	0.0689017	0.00396133	1.06417	0.076623
684	mask_01623-05-005_36,png	0.104081	0.00972931	1.09958	0.118755
685	mask_01623-05-005_37,png	0.17434	0.0247799	1.03708	0.18864
686	mask_01623-05-005_38,png	0.0995025	0.00864082	1.05749	0.11077
687	mask_01623-05-005_39,png	0.0812145	0.00545533	1.07185	0.0887964
688	mask_01623-05-005_4,png	0.167458	0.0251471	1.15221	0.196579
689	mask_01623-05-005_40,png	0.134062	0.0149001	1.07357	0.146766
690	mask_01623-05-005_41,png	0.134328	0.0142672	1.09323	0.149574
691	mask_01623-05-005_42,png	0.259681	0.0564727	1.16557	0.302085
692	mask_01623-05-005_43,png	0.0696517	0.00474433	1.1533	0.0864914
693	mask_01623-05-005_44,png	0.181386	0.0310255	1.15609	0.217213
694	mask_01623-05-005_45,png	0.112876	0.0110876	1.08192	0.128637
695	mask_01623-05-005_46,png	0.162781	0.0293297	1.34031	0.226462
696	mask_01623-05-005_47,png	0.156715	0.0257854	1.34684	0.212242
697	mask_01623-05-005_48,png	0.0713286	0.00473851	1.19183	0.0874672
698	mask_01623-05-005_49,png	0.161458	0.0219712	1.12829	0.182848
699	mask_01623-05-005_5,png	0.0900094	0.00700824	1.15127	0.105491
700	mask_01623-05-005_50,png	0.104478	0.009676	1.06984	0.117017
701	mask_01623-05-005_51,png	0.109609	0.0113728	1.16086	0.132022
702	mask_01623-05-005_52,png	0.155728	0.0303495	1.52345	0.239882
703	mask_01623-05-005_53,png	0.116746	0.011664	1.09217	0.131841
704	mask_01623-05-005_54,png	0.0812816	0.00556047	1.04677	0.0897484
705	mask_01623-05-005_55,png	0.0820896	0.00655012	1.17337	0.100856
706	mask_01623-05-005_56,png	0.146766	0.0190717	1.10586	0.167314
707	mask_01623-05-005_57,png	0.0995025	0.00920246	1.21994	0.125189
708	mask_01623-05-005_58,png	0.119403	0.012491	1.02548	0.134528
709	mask_01623-05-005_59,png	0.0565889	0.00325233	1.24086	0.0730963
710	mask_01623-05-005_6,png	0.0497512	0.00227069	1.07776	0.0574126
711	mask_01623-05-005_60,png	0.0943902	0.0089718	1.25906	0.120517
712	mask_01623-05-005_62,png	0.139406	0.0196475	1.35596	0.185449
713	mask_01623-05-005_64,png	0.185586	0.0289739	1.09112	0.202792
714	mask_01623-05-005_65,png	0.0820896	0.0062686	1.13416	0.0996505
715	mask_01623-05-005_66,png	0.129912	0.0153063	1.1825	0.158088
716	mask_01623-05-005_67,png	0.114428	0.0109095	1.04081	0.124378
717	mask_01623-05-005_69,png	0.0671642	0.00384573	1.02806	0.0740808
718	mask_01623-05-005_7,png	0.142779	0.0175136	1.08604	0.160723
719	mask_01623-05-005_70,png	0.0858396	0.00647971	1.13951	0.100005
720	mask_01623-05-005_71,png	0.109453	0.00993667	1.05153	0.120911
721	mask_01623-05-005_72,png	0.131821	0.0142553	1.05948	0.142548
722	mask_01623-05-005_73,png	0.0820896	0.00619241	1.08214	0.0966502
723	mask_01623-05-005_74,png	0.0905953	0.00942733	1.47829	0.137881
724	mask_01623-05-005_75,png	0.19121	0.0318044	1.13011	0.220283
725	mask_01623-05-005_76,png	0.0639981	0.00385728	1.21509	0.0799306
726	mask_01623-05-005_78,png	0.108863	0.0119197	1.31804	0.142212
727	mask_01623-05-005_79,png	0.134084	0.0153839	1.11402	0.15087
728	mask_01623-05-005_8,png	0.231343	0.0470638	1.13115	0.268091
729	mask_01623-05-005_81,png	0.115756	0.0136528	1.28698	0.15087
730	mask_01623-05-005_82,png	0.0847325	0.00762612	1.36013	0.117901
731	mask_01623-05-005_83,png	0.132225	0.0212382	1.63916	0.226382
732	mask_01623-05-005_84,png	0.0894646	0.00888903	1.44153	0.136379
733	mask_01623-05-005_85,png	0.0547264	0.00270844	1.11813	0.0644096
734	mask_01623-05-005_86,png	0.119403	0.0177352	1.41175	0.177552
735	mask_01623-05-005_87,png	0.0970149	0.0106602	1.34348	0.135081
736	mask_01623-05-005_88,png	0.142543	0.0202175	1.47114	0.20547
737	mask_01623-05-005_89,png	0.121972	0.0126219	1.07185	0.13827
738	mask_01623-05-005_9,png	0.121891	0.0143209	1.10091	0.144299
739	mask_01623-05-005_90,png	0.144114	0.0182624	1.0322	0.167978
740	mask_01623-05-005_91,png	0.0870647	0.00727877	1.19128	0.111064
741	mask_01623-05-005_93,png	0.0506485	0.00237273	1.16778	0.0629221
742	mask_01623-05-005_94,png	0.0895522	0.00683782	1.01477	0.097469
743	mask_01623-05-005_96,png	0.0298507	0.000817511	1.00343	0.0351356
744	mask_01623-05-005_97,png	0.115889	0.0177951	1.6484	0.193048
745	mask_01623-05-005_98,png	0.145259	0.0175974	1.10657	0.164472
746	mask_01623-05-005_99,png	0.0696517	0.00428559	1.08109	0.0820896
747	mask_01623-05-006_0,png	0.0746269	0.00459319	1.03635	0.0801126
748	mask_01623-05-006_1,png	0.0970149	0.00796206	1.04304	0.105966
749	mask_01623-05-006_10,png	0.10199	0.00879445	1.03005	0.110261
750	mask_01623-05-006_100,png	0.13317	0.0144224	1.03435	0.14405
751	mask_01623-05-006_101,png	0.0721393	0.00451187	1.03049	0.0808007
752	mask_01623-05-006_102,png	0.151999	0.0200675	1.08042	0.171484
753	mask_01623-05-006_103,png	0.0895522	0.00845182	1.31303	0.121132
754	mask_01623-05-006_104,png	0.0970149	0.00993667	1.27983	0.135059
755	mask_01623-05-006_105,png	0.0870647	0.00707291	1.2104	0.108938
760	mask_01623-05-006_11,png	0.18111	0.0329882	1.19347	0.226261
770	mask_01623-05-006_12,png	0.12089	0.0124672	1.10034	0.137165
780	mask_01623-05-006_13,png	0.104367	0.0103517	1.19913	0.126372
787	mask_01623-05-006_14,png	0.125189	0.0135753	1.08308	0.139261
797	mask_01623-05-006_15,png	0.0820896	0.00589376	1.07644	0.0930235
804	mask_01623-05-006_16,png	0.151741	0.01864	1.02825	0.161988
811	mask_01623-05-006_17,png	0.159904	0.0259661	1.25703	0.205456
818	mask_01623-05-006_18,png	0.118939	0.0128482	1.10323	0.137773
819	mask_01623-05-006_19,png	0.162434	0.0234622	1.13998	0.186761
820	mask_01623-05-006_2,png	0.124378	0.0129376	1.0714	0.138033
821	mask_01623-05-006_20,png	0.134328	0.0176753	1.19201	0.167386
822	mask_01623-05-006_21,png	0.156716	0.0279185	1.31695	0.217088
823	mask_01623-05-006_22,png	0.0865672	0.00724936	1.18226	0.106077
824	mask_01623-05-006_23,png	0.114573	0.0123481	1.20086	0.139646
825	mask_01623-05-006_24,png	0.166093	0.0259842	1.17641	0.199505
826	mask_01623-05-006_25,png	0.102316	0.00918471	1.13777	0.119403
827	mask_01623-05-006_26,png	0.118123	0.013629	1.26649	0.153019
828	mask_01623-05-006_27,png	0.136465	0.017831	1.26872	0.177025
829	mask_01623-05-006_28,png	0.159204	0.0219832	1.06712	0.17554
830	mask_01623-05-006_29,png	0.145128	0.0196595	1.15601	0.174147
831	mask_01623-05-006_3,png	0.236318	0.0481192	1.03771	0.258753
832	mask_01623-05-006_31,png	0.0814902	0.00824521	1.57815	0.130409
833	mask_01623-05-006_32,png	0.106965	0.0105949	1.19836	0.133012
834	mask_01623-05-006_33,png	0.189055	0.0301926	1.07255	0.209778
835	mask_01623-05-006_34,png	0.0746269	0.00628032	1.45744	0.109885
836	mask_01623-05-006_35,png	0.131841	0.0152107	1.10889	0.151662
837	mask_01623-05-006_36,png	0.142984	0.020962	1.33447	0.192813
838	mask_01623-05-006_37,png	0.120734	0.0143209	1.2712	0.156333
839	mask_01623-05-006_38,png	0.121593	0.0154676	1.34227	0.165654
840	mask_01623-05-006_39,png	0.0920398	0.00686132	1.02608	0.0999752
841	mask_01623-05-006_4,png	0.0970149	0.00967008	1.1866	0.121793
842	mask_01623-05-006_40,png	0.0845771	0.00593473	1.00897	0.0923264
843	mask_01623-05-006_41,png	0.0968692	0.00806231	1.07944	0.107517
844	mask_01623-05-006_42,png	0.0771144	0.00547285	1.20501	0.0951473
845	mask_01623-05-006_43,png	0.0920398	0.00880036	1.17988	0.117523
846	mask_01623-05-006_44,png	0.156716	0.0294866	1.46543	0.243607
847	mask_01623-05-006_45,png	0.0741786	0.00546701	1.27713	0.097469
848	mask_01623-05-006_46,png	0.128174	0.0180886	1.4321	0.186486
849	mask_01623-05-006_47,png	0.140893	0.0235163	1.41348	0.206233
850	mask_01623-05-006_48,png	0.134328	0.0149359	1.02731	0.142883
851	mask_01623-05-006_49,png	0.0820896	0.00592888	1.02691	0.0931497
852	mask_01623-05-006_5,png	0.0895522	0.00670274	1.0035	0.0966502
853	mask_01623-05-006_50,png	0.114428	0.0116819	1.15309	0.138809
854	mask_01623-05-006_51,png	0.165899	0.0243706	1.08484	0.189787
855	mask_01623-05-006_52,png	0.070303	0.00408862	1.09044	0.0777153
856	mask_01623-05-006_53,png	0.108497	0.013313	1.54616	0.164563
857	mask_01623-05-006_54,png	0.121891	0.0159219	1.23042	0.16132
858	mask_01623-05-006_55,png	0.115306	0.0111648	1.04249	0.124115
859	mask_01623-05-006_56,png	0.0882504	0.00760256	1.25215	0.111596
860	mask_01623-05-006_57,png	0.0373134	0.00136289	1.10949	0.0467877
861	mask_01623-05-006_58,png	0.084378	0.00630377	1.12512	0.0986998
862	mask_01623-05-006_6,png	0.154229	0.0209139	1.05839	0.175523
863	mask_01623-05-006_60,png	0.0720041	0.00545533	1.288	0.0975897
864	mask_01623-05-006_61,png	0.097153	0.00800923	1.11057	0.11149
865	mask_01623-05-006_62,png	0.141534	0.0175495	1.10341	0.164563
866	mask_01623-05-006_63,png	0.119403	0.0131461	1.16771	0.144693
867	mask_01623-05-006_65,png	0.114635	0.0117413	1.15616	0.135412
868	mask_01623-05-006_66,png	0.151741	0.0205297	1.08952	0.17677
869	mask_01623-05-006_67,png	0.0970149	0.00795026	1.04485	0.106827
870	mask_01623-05-006_68,png	0.144279	0.0184422	1.19572	0.172498
871	mask_01623-05-006_69,png	0.139155	0.0166576	1.10656	0.156716
872	mask_01623-05-006_7,png	0.234143	0.0474156	1.10599	0.263278
873	mask_01623-05-006_70,png	0.129832	0.0188019	1.4983	0.194558
874	mask_01623-05-006_71,png	0.0900279	0.00799154	1.28252	0.11448
875	mask_01623-05-006_72,png	0.0746269	0.00561306	1.16663	0.0925805
876	mask_01623-05-006_74,png	0.0873185	0.0068437	1.2137	0.106411
877	mask_01623-05-006_75,png	0.11194	0.0112896	1.12213	0.12956
878	mask_01623-05-006_76,png	0.0597015	0.00329829	1.09027	0.0708037
879	mask_01623-05-006_77,png	0.0820896	0.00556631	1.10126	0.0916243
880	mask_01623-05-006_78,png	0.124378	0.0131342	1.07825	0.139924
881	mask_01623-05-006_79,png	0.148055	0.0180707	1.07882	0.165527
882	mask_01623-05-006_8,png	0.11194	0.0124314	1.24685	0.142128
883	mask_01623-05-006_80,png	0.145252	0.0183583	1.11129	0.168246
884	mask_01623-05-006_81,png	0.0724196	0.00456995	1.13389	0.0833596
885	mask_01623-05-006_82,png	0.0920398	0.007526	1.13468	0.112363
886	mask_01623-05-006_83,png	0.104478	0.0091019	1.04042	0.114142
887	mask_01623-05-006_84,png	0.0845771	0.00592888	1.06568	0.0943406
888	mask_01623-05-006_85,png	0.149254	0.0193775	1.1489	0.173107
889	mask_01623-05-006_86,png	0.0928365	0.008139	1.23849	0.11883
890	mask_01623-05-006_87,png	0.0646766	0.00353996	1.01411	0.0706811
891	mask_01623-05-006_88,png	0.187187	0.0359863	1.37891	0.258436
892	mask_01623-05-006_89,png	0.0751796	0.00522773	1.29254	0.0957635
893	mask_01623-05-006_9,png	0.178893	0.0309953	1.20641	0.227555
894	mask_01623-05-006_90,png	0.110722	0.0122231	1.25989	0.146583
895	mask_01623-05-006_91,png	0.0945274	0.00893041	1.18144	0.118554
896	mask_01623-05-006_92,png	0.0689017	0.00439578	1.22199	0.0861186
897	mask_01623-05-006_93,png	0.113126	0.0112955	1.1353	0.133012
898	mask_01623-05-006_94,png	0.151741	0.0209379	1.18087	0.184815
899	mask_01623-05-006_95,png	0.131841	0.0143448	1.05404	0.144817
900	mask_01623-05-006_96,png	0.0917683	0.00726701	1.10197	0.104985
901	mask_01623-05-006_98,png	0.210119	0.0406642	1.18717	0.253276
902	mask_01623-05-006_99,png	0.0945274	0.00900727	1.28682	0.124879
903	mask_01623-05-007_0,png	0.079602	0.00628032	1.23561	0.101294
904	mask_01623-05-007_1,png	0.0895522	0.00714936	1.04129	0.103484
905	mask_01623-05-007_10,png	0.141791	0.0190717	1.08906	0.170235
906	mask_01623-05-007_100,png	0.0618658	0.00339603	1.19238	0.0751306
907	mask_01623-05-007_101,png	0.112947	0.0119376	1.23775	0.14103
908	mask_01623-05-007_102,png	0.0870647	0.00736116	1.11527	0.106411
909	mask_01623-05-007_103,png	0.174923	0.0255204	1.15315	0.202076
910	mask_01623-05-007_105,png	0.181476	0.0278522	1.15248	0.208042
911	mask_01623-05-007_106,png	0.049553	0.00227635	1.17037	0.0598926
912	mask_01623-05-007_107,png	0.0920398	0.00698473	1.06691	0.103141
913	mask_01623-05-007_108,png	0.10199	0.00970562	1.11867	0.120911
914	mask_01623-05-007_109,png	0.121891	0.0151987	1.27803	0.162802
915	mask_01623-05-007_11,png	0.0646766	0.00498877	1.45323	0.0975897
916	mask_01623-05-007_110,png	0.0522388	0.00253752	1.12034	0.0614013
917	mask_01623-05-007_111,png	0.0373134	0.00140162	1.16952	0.0477354
924	mask_01623-05-007_12,png	0.131504	0.0151151	1.1296	0.148872
933	mask_01623-05-007_13,png	0.0746269	0.00480249	1.11207	0.0864914
942	mask_01623-05-007_14,png	0.144538	0.0201875	1.24475	0.182667
952	mask_01623-05-007_15,png	0.127117	0.0165619	1.31578	0.166378
962	mask_01623-05-007_16,png	0.0751228	0.00494218	1.11518	0.0864914
973	mask_01623-05-007_17,png	0.126074	0.0148821	1.10999	0.151919
977	mask_01623-05-007_18,png	0.106965	0.0108382	1.16924	0.127778
978	mask_01623-05-007_19,png	0.135671	0.0167533	1.16099	0.161988
979	mask_01623-05-007_2,png	0.0920398	0.00808001	1.16996	0.11383
980	mask_01623-05-007_20,png	0.0970149	0.00838687	1.10122	0.11149
981	mask_01623-05-007_21,png	0.151741	0.0216647	1.13293	0.177958
982	mask_01623-05-007_22,png	0.0721393	0.00445382	1.02649	0.0791986
983	mask_01623-05-007_23,png	0.0975328	0.0125326	1.61126	0.159975
984	mask_01623-05-007_24,png	0.0864914	0.00789131	1.28293	0.115074
985	mask_01623-05-007_25,png	0.133984	0.0152943	1.0682	0.14758
986	mask_01623-05-007_26,png	0.116394	0.0112005	1.05797	0.128753
987	mask_01623-05-007_27,png	0.0935273	0.0081921	1.1576	0.111967
988	mask_01623-05-007_28,png	0.0870647	0.00666751	1.0985	0.102106
989	mask_01623-05-007_29,png	0.0864914	0.00693183	1.17683	0.105435
990	mask_01623-05-007_3,png	0.126948	0.0142851	1.02645	0.143134
991	mask_01623-05-007_30,png	0.115675	0.014703	1.38529	0.1648
992	mask_01623-05-007_31,png	0.193549	0.0344325	1.11697	0.228816
993	mask_01623-05-007_32,png	0.0770976	0.00500624	1.0573	0.0854709
994	mask_01623-05-007_33,png	0.0995025	0.01145	1.37094	0.14238
995	mask_01623-05-007_34,png	0.171819	0.0273097	1.16429	0.202031
996	mask_01623-05-007_35,png	0.0746269	0.00494218	1.11208	0.0867954
997	mask_01623-05-007_36,png	0.212879	0.0403735	1.16455	0.250954
998	mask_01623-05-007_37,png	0.0920398	0.00916696	1.30132	0.123538
999	mask_01623-05-007_38,png	0.123247	0.0167174	1.47778	0.180261
1000	mask_01623-05-007_39,png	0.0689017	0.00465712	1.24758	0.0888953
1001	mask_01623-05-007_4,png	0.121891	0.0126458	1.02329	0.132405
1002	mask_01623-05-007_40,png	0.0931487	0.00787952	1.16169	0.110261
1003	mask_01623-05-007_41,png	0.119403	0.0130746	1.20253	0.144796
1004	mask_01623-05-007_42,png	0.116915	0.011248	1.01239	0.126113
1005	mask_01623-05-007_43,png	0.0920398	0.00944508	1.38022	0.130477
1006	mask_01623-05-007_44,png	0.143785	0.0171903	1.13145	0.164252
1007	mask_01623-05-007_45,png	0.179104	0.0277256	1.07647	0.201732
1008	mask_01623-05-007_46,png	0.116915	0.0129793	1.19939	0.147498
1009	mask_01623-05-007_47,png	0.114403	0.0111411	1.10613	0.130294
1010	mask_01623-05-007_48,png	0.133563	0.0144164	1.03441	0.144486
1011	mask_01623-05-007_49,png	0.17444	0.0270084	1.16519	0.208231
1012	mask_01623-05-007_5,png	0.0945274	0.00729054	1.02572	0.101294
1013	mask_01623-05-007_50,png	0.0970149	0.00852859	1.18733	0.120813
1014	mask_01623-05-007_51,png	0.116915	0.0138675	1.22169	0.147762
1015	mask_01623-05-007_52,png	0.0870647	0.00716112	1.19287	0.105519
1016	mask_01623-05-007_53,png	0.1329	0.0176873	1.3121	0.17934
1017	mask_01623-05-007_54,png	0.101822	0.00906641	1.18385	0.119353
1018	mask_01623-05-007_55,png	0.0847014	0.00726701	1.26276	0.112363
1019	mask_01623-05-007_56,png	0.10199	0.0102449	1.2889	0.137773
1020	mask_01623-05-007_58,png	0.10999	0.0122648	1.27946	0.142799
1021	mask_01623-05-007_59,png	0.13934	0.0163585	1.12734	0.163188
1022	mask_01623-05-007_6,png	0.0845771	0.00748478	1.23068	0.109885
1023	mask_01623-05-007_60,png	0.139303	0.0192036	1.17447	0.172916
1024	mask_01623-05-007_61,png	0.156716	0.0234742	1.19506	0.193563
1025	mask_01623-05-007_63,png	0.0870647	0.00646211	1.04395	0.097469
1026	mask_01623-05-007_64,png	0.104478	0.00990704	1.10044	0.119949
1027	mask_01623-05-007_65,png	0.108251	0.0136707	1.50255	0.164417
1028	mask_01623-05-007_66,png	0.144548	0.0193236	1.12967	0.179859
1029	mask_01623-05-007_67,png	0.159204	0.0230712	1.28033	0.204365
1030	mask_01623-05-007_68,png	0.0845771	0.00720818	1.18564	0.106077
1031	mask_01623-05-007_7,png	0.0565889	0.0028855	1.08463	0.0650753
1032	mask_01623-05-007_70,png	0.0741786	0.00449445	1.00247	0.0786455
1033	mask_01623-05-007_72,png	0.0928043	0.00868218	1.27901	0.119403
1034	mask_01623-05-007_73,png	0.0817977	0.00656772	1.34205	0.109696
1035	mask_01623-05-007_74,png	0.0970453	0.00848725	1.11052	0.11383
1036	mask_01623-05-007_75,png	0.0717854	0.00419865	1.07364	0.0786455
1037	mask_01623-05-007_76,png	0.223881	0.0449962	1.1349	0.27463
1038	mask_01623-05-007_77,png	0.0704713	0.00515193	1.33539	0.0958249
1039	mask_01623-05-007_78,png	0.114428	0.0110045	1.0762	0.129859
1040	mask_01623-05-007_79,png	0.0864914	0.00714936	1.18991	0.106827
1041	mask_01623-05-007_8,png	0.0900094	0.00765558	1.15137	0.109561
1042	mask_01623-05-007_80,png	0.0878442	0.00725524	1.18552	0.112363
1043	mask_01623-05-007_82,png	0.228982	0.0452508	1.16221	0.273198
1044	mask_01623-05-007_83,png	0.199066	0.0351518	1.1336	0.227954
1045	mask_01623-05-007_84,png	0.0422886	0.00166857	1.10552	0.0500894
1046	mask_01623-05-007_85,png	0.0721393	0.00484904	1.14855	0.0864914
1047	mask_01623-05-007_86,png	0.129353	0.0162448	1.28225	0.167548
1048	mask_01623-05-007_87,png	0.167912	0.0231855	1.08566	0.189707
1049	mask_01623-05-007_88,png	0.109453	0.0109213	1.21496	0.139924
1050	mask_01623-05-007_89,png	0.13037	0.0162388	1.24241	0.167727
1051	mask_01623-05-007_9,png	0.155091	0.0230953	1.19292	0.191022
1052	mask_01623-05-007_90,png	0.160424	0.0228548	1.1541	0.189134
1053	mask_01623-05-007_91,png	0.177222	0.03044	1.26846	0.228511
1054	mask_01623-05-007_92,png	0.0893565	0.00710819	1.20947	0.107819
1055	mask_01623-05-007_93,png	0.0829735	0.00704351	1.28633	0.109561
1056	mask_01623-05-007_94,png	0.0776966	0.00580015	1.21629	0.0971362
1057	mask_01623-05-007_95,png	0.114428	0.013951	1.32463	0.157347
1058	mask_01623-05-007_96,png	0.0945274	0.00768503	1.04136	0.107434
1059	mask_01623-05-007_97,png	0.169163	0.0246956	1.0551	0.190025
1060	mask_01623-05-007_99,png	0.203057	0.0357081	1.13592	0.239389
1061	mask_01623-05-008_0,png	0.145209	0.02247	1.34083	0.198853
1062	mask_01623-05-008_1,png	0.198334	0.040537	1.39163	0.278301
1063	mask_01623-05-008_10,png	0.137087	0.0180886	1.25959	0.172411
1073	mask_01623-05-008_11,png	0.206289	0.0366274	1.04093	0.229886
1083	mask_01623-05-008_12,png	0.108497	0.0131044	1.39131	0.153137
1093	mask_01623-05-008_13,png	0.150438	0.0225482	1.2913	0.195053
1101	mask_01623-05-008_14,png	0.214523	0.0446507	1.19061	0.263463
1108	mask_01623-05-008_15,png	0.0829497	0.0062686	1.13971	0.0975897
1117	mask_01623-05-008_16,png	0.126866	0.0144045	1.11739	0.149854
1127	mask_01623-05-008_17,png	0.130348	0.0152166	1.14995	0.151662
1135	mask_01623-05-008_18,png	0.121281	0.0151748	1.2909	0.158864
1139	mask_01623-05-008_19,png	0.119403	0.0119019	1.09916	0.134439
1140	mask_01623-05-008_2,png	0.118428	0.0129733	1.16422	0.140073
1141	mask_01623-05-008_20,png	0.143477	0.0192696	1.16432	0.170447
1142	mask_01623-05-008_21,png	0.0987532	0.00926162	1.19063	0.121988
1143	mask_01623-05-008_22,png	0.0706607	0.00503537	1.23378	0.0910138
1144	mask_01623-05-008_23,png	0.162525	0.0267975	1.47997	0.231866
1145	mask_01623-05-008_24,png	0.118921	0.0122886	1.14843	0.14238
1146	mask_01623-05-008_25,png	0.118767	0.013158	1.22733	0.149854
1147	mask_01623-05-008_26,png	0.0945274	0.00841639	1.20353	0.115691
1148	mask_01623-05-008_27,png	0.10199	0.0101915	1.20195	0.129675
1149	mask_01623-05-008_28,png	0.116394	0.0125207	1.14063	0.137946
1150	mask_01623-05-008_29,png	0.0812145	0.00540862	1.10277	0.0931497
1151	mask_01623-05-008_3,png	0.106965	0.0108738	1.19979	0.131388
1152	mask_01623-05-008_30,png	0.219708	0.0512563	1.31652	0.295598
1153	mask_01623-05-008_31,png	0.147461	0.0184722	1.10242	0.166973
1154	mask_01623-05-008_32,png	0.11194	0.0101323	1.02351	0.118954
1155	mask_01623-05-008_34,png	0.079602	0.00671448	1.3116	0.108693
1156	mask_01623-05-008_35,png	0.0846508	0.00612796	1.11173	0.0953017
1157	mask_01623-05-008_36,png	0.107599	0.0108738	1.2134	0.133258
1158	mask_01623-05-008_37,png	0.184228	0.0300658	1.17856	0.221925
1159	mask_01623-05-008_38,png	0.146766	0.017831	1.02937	0.160406
1160	mask_01623-05-008_39,png	0.145771	0.0187839	1.15833	0.169172
1161	mask_01623-05-008_4,png	0.0945274	0.00775574	1.05195	0.105966
1162	mask_01623-05-008_40,png	0.0636248	0.00352268	1.08858	0.0718579
1163	mask_01623-05-008_41,png	0.10199	0.00939773	1.11191	0.119701
1164	mask_01623-05-008_43,png	0.176617	0.0299572	1.10844	0.215802
1165	mask_01623-05-008_44,png	0.124739	0.0133964	1.17305	0.148691
1166	mask_01623-05-008_45,png	0.141791	0.0171184	1.05094	0.156716
1167	mask_01623-05-008_46,png	0.104478	0.0109273	1.2403	0.133616
1168	mask_01623-05-008_47,png	0.0869487	0.00701412	1.20994	0.107434
1169	mask_01623-05-008_48,png	0.162705	0.02481	1.17831	0.193438
1170	mask_01623-05-008_49,png	0.225666	0.0440689	1.12368	0.262597
1171	mask_01623-05-008_5,png	0.0978238	0.00978854	1.27011	0.126866
1172	mask_01623-05-008_50,png	0.109182	0.0119078	1.26823	0.140606
1173	mask_01623-05-008_51,png	0.141595	0.0170107	1.06525	0.154307
1174	mask_01623-05-008_52,png	0.146766	0.0198455	1.23903	0.187871
1175	mask_01623-05-008_53,png	0.110742	0.011456	1.21476	0.135081
1176	mask_01623-05-008_54,png	0.109453	0.0105	1.10234	0.123538
1177	mask_01623-05-008_55,png	0.0870647	0.00770271	1.26962	0.115177
1178	mask_01623-05-008_56,png	0.143743	0.0187719	1.22616	0.176071
1179	mask_01623-05-008_57,png	0.210562	0.045075	1.3413	0.28574
1180	mask_01623-05-008_58,png	0.0771144	0.00584695	1.16355	0.0949308
1181	mask_01623-05-008_59,png	0.196426	0.0360951	1.17972	0.237087
1182	mask_01623-05-008_6,png	0.079602	0.00614554	1.18471	0.0989681
1183	mask_01623-05-008_60,png	0.0758312	0.00494218	1.1162	0.0864914
1184	mask_01623-05-008_61,png	0.0671642	0.00423342	1.15623	0.0808007
1185	mask_01623-05-008_62,png	0.126866	0.0147567	1.12126	0.147924
1186	mask_01623-05-008_63,png	0.0995025	0.00879445	1.13068	0.117523
1187	mask_01623-05-008_64,png	0.131679	0.0174657	1.26947	0.171151
1188	mask_01623-05-008_65,png	0.177958	0.0260324	1.0285	0.193298
1189	mask_01623-05-008_66,png	0.116221	0.013021	1.30232	0.153235
1190	mask_01623-05-008_67,png	0.188105	0.0318225	1.14418	0.223285
1191	mask_01623-05-008_69,png	0.146766	0.0221995	1.3074	0.198367
1192	mask_01623-05-008_7,png	0.146766	0.0220433	1.26603	0.191022
1193	mask_01623-05-008_70,png	0.161619	0.022945	1.06374	0.180411
1194	mask_01623-05-008_71,png	0.152665	0.0217128	1.25517	0.192735
1195	mask_01623-05-008_72,png	0.159236	0.0218269	1.13886	0.180861
1196	mask_01623-05-008_75,png	0.144206	0.0211241	1.30746	0.187871
1197	mask_01623-05-008_76,png	0.0768726	0.0053736	1.15674	0.0921673
1198	mask_01623-05-008_77,png	0.0671427	0.00414652	1.12938	0.0791986
1199	mask_01623-05-008_78,png	0.0671642	0.00413494	1.15989	0.0801126
1200	mask_01623-05-008_79,png	0.0895522	0.00670861	1.02941	0.0985505
1201	mask_01623-05-008_8,png	0.131841	0.0161611	1.16085	0.156429
1202	mask_01623-05-008_80,png	0.169163	0.0243044	1.09289	0.188112
1203	mask_01623-05-008_81,png	0.0870647	0.00693771	1.07034	0.0998868
1204	mask_01623-05-008_82,png	0.0945274	0.0081508	1.15367	0.116177
1205	mask_01623-05-008_83,png	0.0920398	0.00733173	1.14452	0.106965
1206	mask_01623-05-008_84,png	0.144739	0.0201035	1.30417	0.183588
1207	mask_01623-05-008_85,png	0.0909245	0.00835736	1.30367	0.120911
1208	mask_01623-05-008_86,png	0.121891	0.0122529	1.09945	0.133616
1209	mask_01623-05-008_87,png	0.0729019	0.00532107	1.24595	0.0943406
1210	mask_01623-05-008_9,png	0.105426	0.00980632	1.12993	0.121328
1211	mask_01623-05-008_92,png	0.0509677	0.00258875	1.26559	0.0663012
1212	mask_01623-05-008_93,png	0.116807	0.0123541	1.18689	0.139924
1213	mask_01623-05-008_94,png	0.17428	0.0327285	1.41543	0.250482
1214	mask_01623-05-008_95,png	0.09903	0.00869399	1.09791	0.115588
1215	mask_01623-05-008_96,png	0.141791	0.0182624	1.16748	0.171221
1216	mask_01623-05-008_97,png	0.0882504	0.00706115	1.20948	0.111064
1217	mask_01623-05-008_98,png	0.131093	0.0185561	1.39882	0.190833
1218	mask_01623-05-009_0,png	0.0782606	0.00577676	1.16005	0.0943406
1219	mask_01623-05-009_1,png	0.0870647	0.00658533	1.07927	0.0985804
1220	mask_01623-05-009_10,png	0.189799	0.0314481	1.11932	0.214114
1221	mask_01623-05-009_100,png	0.104047	0.0106424	1.21493	0.130363
1222	mask_01623-05-009_101,png	0.0561305	0.00454091	1.78299	0.105182
1223	mask_01623-05-009_102,png	0.0900094	0.00856993	1.35343	0.124879
1224	mask_01623-05-009_103,png	0.0845771	0.00702	1.17332	0.104393
1225	mask_01623-05-009_104,png	0.0820896	0.00601083	1.0738	0.0940911
1226	mask_01623-05-009_105,png	0.101155	0.009753	1.27859	0.131115
1227	mask_01623-05-009_106,png	0.0646766	0.00393242	1.23889	0.0809449
1228	mask_01623-05-009_108,png	0.149254	0.0207938	1.21023	0.183506
1229	mask_01623-05-009_109,png	0.0407582	0.00178045	1.27363	0.0562108
1230	mask_01623-05-009_11,png	0.111117	0.0104822	1.10909	0.126866
1231	mask_01623-05-009_111,png	0.0952863	0.00721406	1.04736	0.102423
1236	mask_01623-05-009_12,png	0.177283	0.0316715	1.29816	0.234206
1245	mask_01623-05-009_13,png	0.0820896	0.0058177	1.09006	0.0953017
1255	mask_01623-05-009_14,png	0.0724196	0.0048374	1.16967	0.0867954
1263	mask_01623-05-009_15,png	0.149254	0.0197915	1.1107	0.17463
1271	mask_01623-05-009_16,png	0.136661	0.0157784	1.0778	0.153469
1276	mask_01623-05-009_17,png	0.0995025	0.0089245	1.11511	0.115793
1277	mask_01623-05-009_18,png	0.201493	0.0431174	1.3569	0.280705
1278	mask_01623-05-009_19,png	0.129353	0.0166815	1.20351	0.160723
1279	mask_01623-05-009_2,png	0.0812145	0.00557216	1.07752	0.0911105
1280	mask_01623-05-009_20,png	0.123984	0.0130329	1.09052	0.13827
1281	mask_01623-05-009_22,png	0.0845771	0.00613382	1.03816	0.0940911
1282	mask_01623-05-009_23,png	0.109358	0.0100552	1.06246	0.119428
1283	mask_01623-05-009_24,png	0.145581	0.0197975	1.17567	0.172271
1284	mask_01623-05-009_25,png	0.11194	0.0125684	1.25232	0.144299
1285	mask_01623-05-009_26,png	0.105925	0.011884	1.2969	0.141981
1286	mask_01623-05-009_27,png	0.115172	0.0130448	1.24312	0.14562
1287	mask_01623-05-009_28,png	0.0688469	0.00406547	1.11445	0.0799306
1288	mask_01623-05-009_29,png	0.0935273	0.00898362	1.20619	0.121866
1289	mask_01623-05-009_3,png	0.129353	0.0147448	1.14605	0.15087
1290	mask_01623-05-009_30,png	0.0895447	0.00756722	1.19241	0.108175
1291	mask_01623-05-009_31,png	0.106965	0.0128959	1.38631	0.152549
1292	mask_01623-05-009_32,png	0.109453	0.0100611	1.12402	0.126372
1293	mask_01623-05-009_33,png	0.109962	0.0118365	1.18087	0.137578
1294	mask_01623-05-009_34,png	0.0970149	0.00875308	1.18103	0.121132
1295	mask_01623-05-009_35,png	0.0945274	0.00804462	1.05335	0.108584
1296	mask_01623-05-009_36,png	0.120426	0.0134799	1.21051	0.146133
1297	mask_01623-05-009_37,png	0.10584	0.0105415	1.1313	0.124879
1298	mask_01623-05-009_4,png	0.0895522	0.00717876	1.11773	0.103141
1299	mask_01623-05-009_40,png	0.0696517	0.00419865	1.07621	0.0778274
1300	mask_01623-05-009_41,png	0.093668	0.00893632	1.28581	0.12308
1301	mask_01623-05-009_42,png	0.153529	0.0202775	1.11905	0.173801
1302	mask_01623-05-009_43,png	0.124267	0.0160654	1.27825	0.163188
1303	mask_01623-05-009_44,png	0.130466	0.0165619	1.24292	0.165672
1304	mask_01623-05-009_45,png	0.111117	0.0107611	1.1225	0.128197
1305	mask_01623-05-009_46,png	0.159342	0.0228367	1.15402	0.186825
1306	mask_01623-05-009_47,png	0.10199	0.00903093	1.08151	0.115921
1307	mask_01623-05-009_49,png	0.140362	0.0206437	1.30894	0.187791
1308	mask_01623-05-009_5,png	0.17661	0.0289316	1.11766	0.21077
1309	mask_01623-05-009_50,png	0.122959	0.015139	1.20076	0.154869
1310	mask_01623-05-009_51,png	0.132551	0.0160295	1.21556	0.163391
1311	mask_01623-05-009_52,png	0.156716	0.0250568	1.21384	0.199505
1312	mask_01623-05-009_53,png	0.109453	0.0103101	1.06132	0.122086
1313	mask_01623-05-009_54,png	0.0917594	0.00734939	1.13379	0.109155
1314	mask_01623-05-009_55,png	0.0812035	0.005964	1.21799	0.102106
1315	mask_01623-05-009_56,png	0.159379	0.0241239	1.18252	0.196025
1316	mask_01623-05-009_57,png	0.104478	0.0125445	1.37181	0.149994
1317	mask_01623-05-009_58,png	0.0980028	0.00854631	1.09454	0.114246
1318	mask_01623-05-009_59,png	0.0935273	0.00769682	1.12389	0.108475
1319	mask_01623-05-009_6,png	0.0920398	0.00718465	1.05753	0.102192
1320	mask_01623-05-009_60,png	0.0812145	0.00540862	1.04215	0.087601
1321	mask_01623-05-009_61,png	0.138707	0.0179868	1.22856	0.16981
1322	mask_01623-05-009_62,png	0.0597015	0.00329829	1.12973	0.0718579
1323	mask_01623-05-009_63,png	0.0696517	0.00446543	1.17474	0.0841963
1324	mask_01623-05-009_64,png	0.132225	0.0165379	1.27719	0.170111
1325	mask_01623-05-009_65,png	0.139303	0.0181306	1.14963	0.166378
1326	mask_01623-05-009_66,png	0.116915	0.0145418	1.25121	0.154307
1327	mask_01623-05-009_67,png	0.0984524	0.00968785	1.20508	0.123442
1328	mask_01623-05-009_68,png	0.128707	0.013784	1.06931	0.143134
1329	mask_01623-05-009_69,png	0.156492	0.0236546	1.26993	0.202703
1330	mask_01623-05-009_7,png	0.0935273	0.00727289	1.09262	0.103398
1331	mask_01623-05-009_70,png	0.11194	0.0131044	1.39037	0.156716
1332	mask_01623-05-009_71,png	0.124378	0.0159757	1.39657	0.177025
1333	mask_01623-05-009_73,png	0.14249	0.0167653	1.07669	0.160406
1334	mask_01623-05-009_74,png	0.116915	0.0134441	1.16441	0.146358
1335	mask_01623-05-009_75,png	0.0646766	0.00373024	1.12096	0.0763571
1336	mask_01623-05-009_76,png	0.0776333	0.00521024	1.09434	0.0885321
1337	mask_01623-05-009_77,png	0.0738863	0.00517525	1.20792	0.0905939
1338	mask_01623-05-009_78,png	0.0842064	0.00652664	1.25526	0.106411
1339	mask_01623-05-009_79,png	0.126465	0.0143269	1.12153	0.147234
1340	mask_01623-05-009_8,png	0.104478	0.0100671	1.14798	0.124306
1341	mask_01623-05-009_80,png	0.0920398	0.00793847	1.11271	0.108475
1342	mask_01623-05-009_81,png	0.104478	0.00900727	1.07746	0.115921
1343	mask_01623-05-009_82,png	0.135412	0.0155214	1.0824	0.153781
1344	mask_01623-05-009_83,png	0.140759	0.0196235	1.28773	0.185806
1345	mask_01623-05-009_84,png	0.132225	0.0143209	1.05535	0.144299
1346	mask_01623-05-009_85,png	0.110079	0.0132653	1.3848	0.158221
1347	mask_01623-05-009_87,png	0.0646766	0.00482577	1.40381	0.0943406
1348	mask_01623-05-009_88,png	0.126948	0.0131283	1.03536	0.137512
1349	mask_01623-05-009_89,png	0.131841	0.0158322	1.0885	0.155815
1350	mask_01623-05-009_9,png	0.162579	0.0288412	1.29001	0.213208
1351	mask_01623-05-009_90,png	0.111389	0.014136	1.54123	0.174164
1352	mask_01623-05-009_91,png	0.0547264	0.00263432	1.13187	0.0629677
1353	mask_01623-05-009_92,png	0.0877475	0.00701412	1.09875	0.10294
1354	mask_01623-05-009_93,png	0.126866	0.0134084	1.04178	0.140606
1355	mask_01623-05-009_94,png	0.10209	0.0108857	1.26273	0.137165
1356	mask_01623-05-009_96,png	0.149746	0.0189937	1.10009	0.166522
1357	mask_01623-05-009_98,png	0.0696517	0.00505868	1.19427	0.0897484
1358	mask_01623-05-009_99,png	0.10008	0.00961086	1.26496	0.127498
1359	mask_01623-05-010_0,png	0.155221	0.0211241	1.09121	0.172079
1360	mask_01623-05-010_1,png	0.0689017	0.00392086	1.07424	0.0765092
1361	mask_01623-05-010_10,png	0.126866	0.016502	1.30208	0.169686
1370	mask_01623-05-010_11,png	0.191542	0.0432023	1.49463	0.287596
1380	mask_01623-05-010_12,png	0.0771144	0.00541446	1.08624	0.0887964
1389	mask_01623-05-010_13,png	0.164179	0.024166	1.10058	0.187067
1399	mask_01623-05-010_14,png	0.0882504	0.00706115	1.17165	0.106189
1409	mask_01623-05-010_15,png	0.129353	0.0177292	1.24649	0.168798
1413	mask_01623-05-010_16,png	0.234773	0.0477977	1.16986	0.277218
1414	mask_01623-05-010_17,png	0.104478	0.00958125	1.03447	0.115921
1415	mask_01623-05-010_18,png	0.169458	0.0267252	1.22408	0.216432
1416	mask_01623-05-010_19,png	0.121671	0.0120744	1.04398	0.132225
1417	mask_01623-05-010_2,png	0.146766	0.0214965	1.19746	0.182039
1418	mask_01623-05-010_20,png	0.150065	0.0210941	1.16085	0.177687
1419	mask_01623-05-010_21,png	0.10483	0.00946284	1.10682	0.120911
1420	mask_01623-05-010_22,png	0.140579	0.0184782	1.17122	0.168888
1421	mask_01623-05-010_23,png	0.0621891	0.00336728	1.06969	0.0696932
1422	mask_01623-05-010_24,png	0.079602	0.00626274	1.18477	0.0998868
1423	mask_01623-05-010_25,png	0.176617	0.0306513	1.17933	0.220448
1424	mask_01623-05-010_26,png	0.129353	0.0137005	1.07917	0.144133
1425	mask_01623-05-010_27,png	0.0497512	0.00234437	1.11769	0.0589799
1426	mask_01623-05-010_28,png	0.079602	0.00674971	1.2791	0.106827
1427	mask_01623-05-010_29,png	0.0906441	0.00803282	1.21743	0.112994
1428	mask_01623-05-010_3,png	0.0803988	0.00554879	1.10866	0.0907556
1429	mask_01623-05-010_30,png	0.10199	0.00958717	1.13268	0.118954
1430	mask_01623-05-010_31,png	0.0721393	0.00499459	1.1595	0.0879013
1431	mask_01623-05-010_32,png	0.155314	0.0302831	1.51518	0.237048
1432	mask_01623-05-010_33,png	0.165472	0.030941	1.38225	0.236523
1433	mask_01623-05-010_34,png	0.104478	0.00943917	1.05376	0.116305
1434	mask_01623-05-010_35,png	0.10584	0.00994852	1.10185	0.1198
1435	mask_01623-05-010_36,png	0.243895	0.056983	1.27146	0.316537
1436	mask_01623-05-010_37,png	0.116915	0.0118067	1.1126	0.134084
1437	mask_01623-05-010_38,png	0.0845771	0.00601669	1.06232	0.0931497
1438	mask_01623-05-010_39,png	0.144279	0.0173879	1.10188	0.162728
1439	mask_01623-05-010_4,png	0.0935273	0.0084282	1.1974	0.115921
1440	mask_01623-05-010_40,png	0.0970149	0.00893632	1.23525	0.121891
1441	mask_01623-05-010_41,png	0.252367	0.0536058	1.10839	0.284203
1442	mask_01623-05-010_42,png	0.0705688	0.00476177	1.19854	0.0864914
1443	mask_01623-05-010_43,png	0.152498	0.0212382	1.24414	0.185709
1444	mask_01623-05-010_44,png	0.165255	0.0236306	1.08404	0.185466
1445	mask_01623-05-010_45,png	0.106965	0.010405	1.12936	0.128011
1446	mask_01623-05-010_46,png	0.11794	0.0133368	1.19552	0.144693
1447	mask_01623-05-010_47,png	0.0895522	0.00753189	1.18894	0.109804
1448	mask_01623-05-010_48,png	0.143699	0.0221815	1.38823	0.205779
1449	mask_01623-05-010_49,png	0.0820896	0.00659707	1.16691	0.102192
1450	mask_01623-05-010_5,png	0.142206	0.0177831	1.15263	0.170235
1451	mask_01623-05-010_50,png	0.1538	0.0207758	1.17147	0.180928
1452	mask_01623-05-010_51,png	0.135743	0.0146313	1.00856	0.141875
1453	mask_01623-05-010_52,png	0.146766	0.0194075	1.14337	0.171344
1454	mask_01623-05-010_53,png	0.112876	0.0114976	1.0795	0.129652
1455	mask_01623-05-010_54,png	0.0895522	0.00783825	1.22137	0.112125
1456	mask_01623-05-010_55,png	0.158609	0.0213884	1.11358	0.177958
1457	mask_01623-05-010_56,png	0.131859	0.015145	1.14578	0.154423
1458	mask_01623-05-010_57,png	0.114428	0.0112955	1.05767	0.126678
1459	mask_01623-05-010_58,png	0.150779	0.0221154	1.28644	0.203105
1460	mask_01623-05-010_59,png	0.126866	0.013313	1.06239	0.140606
1461	mask_01623-05-010_6,png	0.102322	0.00927937	1.11648	0.11775
1462	mask_01623-05-010_60,png	0.0548299	0.00311458	1.28838	0.0731359
1463	mask_01623-05-010_62,png	0.154229	0.0198815	1.07976	0.181609
1464	mask_01623-05-010_63,png	0.0615913	0.00317195	1.10284	0.0698588
1465	mask_01623-05-010_65,png	0.0864914	0.00769682	1.39284	0.121402
1466	mask_01623-05-010_66,png	0.106965	0.0110579	1.20891	0.132742
1467	mask_01623-05-010_67,png	0.111621	0.0109867	1.15784	0.131841
1468	mask_01623-05-010_68,png	0.0671642	0.00381107	1.01154	0.0730963
1469	mask_01623-05-010_69,png	0.134328	0.0148463	1.07056	0.146766
1470	mask_01623-05-010_7,png	0.121891	0.0142195	1.10317	0.144113
1471	mask_01623-05-010_70,png	0.0870647	0.00700236	1.15117	0.107517
1472	mask_01623-05-010_72,png	0.0625694	0.00389196	1.22405	0.0812683
1473	mask_01623-05-010_73,png	0.0870647	0.00657359	1.07099	0.0966502
1474	mask_01623-05-010_74,png	0.15872	0.0206017	1.06866	0.174302
1475	mask_01623-05-010_75,png	0.136816	0.0190957	1.25235	0.173749
1476	mask_01623-05-010_76,png	0.136816	0.0166576	1.15693	0.162266
1477	mask_01623-05-010_78,png	0.135598	0.0159578	1.15697	0.159806
1478	mask_01623-05-010_79,png	0.104478	0.0106661	1.2266	0.135853
1479	mask_01623-05-010_8,png	0.10804	0.0112658	1.21828	0.133839
1480	mask_01623-05-010_80,png	0.0323383	0.000963061	1.06815	0.0384683
1481	mask_01623-05-010_81,png	0.103099	0.0103635	1.35575	0.145435
1482	mask_01623-05-010_82,png	0.0547264	0.00259444	1.10598	0.0638274
1483	mask_01623-05-010_83,png	0.139303	0.015611	1.03142	0.150771
1484	mask_01623-05-010_84,png	0.177849	0.0286059	1.21315	0.214227
1485	mask_01623-05-010_85,png	0.0906974	0.0077911	1.24902	0.114246
1486	mask_01623-05-010_86,png	0.139303	0.0175256	1.08991	0.166829
1487	mask_01623-05-010_87,png	0.11806	0.0122231	1.08341	0.135081
1488	mask_01623-05-010_88,png	0.111914	0.0102331	1.08645	0.123418
1489	mask_01623-05-010_89,png	0.089084	0.00698473	1.12842	0.106411
1490	mask_01623-05-010_9,png	0.125189	0.0134739	1.08418	0.140073
1495	mask_01623-05-011_0,png	0.0920398	0.00768503	1.13392	0.108693
1496	mask_01623-05-011_1,png	0.0597015	0.00420445	1.46409	0.0902371
1497	mask_01623-05-011_10,png	0.11194	0.0127768	1.2625	0.148872
1498	mask_01623-05-011_100,png	0.0814216	0.00660881	1.27668	0.106965
1499	mask_01623-05-011_102,png	0.0845771	0.00727877	1.1933	0.108584
1500	mask_01623-05-011_104,png	0.139385	0.0189577	1.26304	0.177586
1501	mask_01623-05-011_105,png	0.0936394	0.00831013	1.17172	0.113282
1502	mask_01623-05-011_107,png	0.0982234	0.00935038	1.19868	0.120911
1503	mask_01623-05-011_108,png	0.0746269	0.00720229	1.65019	0.127241
1504	mask_01623-05-011_109,png	0.0764065	0.0058294	1.33402	0.105519
1505	mask_01623-05-011_11,png	0.079602	0.00585866	1.18298	0.0966502
1506	mask_01623-05-011_110,png	0.116915	0.0140823	1.29444	0.153235
1507	mask_01623-05-011_111,png	0.0820896	0.00621585	1.10683	0.0965284
1508	mask_01623-05-011_112,png	0.102956	0.0117889	1.47893	0.153703
1509	mask_01623-05-011_113,png	0.114428	0.0124493	1.2104	0.141474
1510	mask_01623-05-011_114,png	0.0785665	0.00518108	1.09263	0.0897484
1511	mask_01623-05-011_115,png	0.0938575	0.00826882	1.20523	0.11661
1512	mask_01623-05-011_116,png	0.0572139	0.00329254	1.23292	0.0736885
1513	mask_01623-05-011_117,png	0.0422886	0.00212363	1.38906	0.0643203
1514	mask_01623-05-011_12,png	0.0952863	0.0086999	1.21968	0.120591
1524	mask_01623-05-011_13,png	0.104478	0.00932079	1.07248	0.114635
1534	mask_01623-05-011_14,png	0.0696517	0.00437258	1.07777	0.0791986
1543	mask_01623-05-011_15,png	0.135743	0.0176993	1.19321	0.164197
1552	mask_01623-05-011_16,png	0.0995025	0.00987741	1.21302	0.126395
1561	mask_01623-05-011_17,png	0.0895522	0.00714936	1.13438	0.104506
1571	mask_01623-05-011_18,png	0.153332	0.0188079	1.03346	0.163923
1581	mask_01623-05-011_19,png	0.174129	0.0277196	1.15894	0.205896
1589	mask_01623-05-011_2,png	0.116915	0.0126934	1.20603	0.145599
1590	mask_01623-05-011_20,png	0.11194	0.0111648	1.10254	0.130363
1599	mask_01623-05-011_21,png	0.168759	0.0235825	1.15321	0.191841
1603	mask_01623-05-011_22,png	0.155528	0.0260143	1.36899	0.215956
1604	mask_01623-05-011_23,png	0.079602	0.00588206	1.1814	0.0970149
1605	mask_01623-05-011_24,png	0.124378	0.0128721	1.05287	0.134195
1606	mask_01623-05-011_25,png	0.0837133	0.00676146	1.21139	0.103826
1607	mask_01623-05-011_26,png	0.106965	0.0103042	1.12561	0.12545
1608	mask_01623-05-011_27,png	0.11194	0.0139928	1.4091	0.160424
1609	mask_01623-05-011_28,png	0.0860697	0.00730231	1.23541	0.110046
1610	mask_01623-05-011_29,png	0.0771144	0.0081685	1.6351	0.132044
1611	mask_01623-05-011_3,png	0.0771144	0.0063624	1.3397	0.105435
1612	mask_01623-05-011_30,png	0.178861	0.0290281	1.22129	0.217422
1613	mask_01623-05-011_31,png	0.146437	0.0181126	1.11724	0.164344
1614	mask_01623-05-011_32,png	0.0696517	0.00427399	1.12255	0.0823734
1615	mask_01623-05-011_33,png	0.120734	0.0146075	1.25715	0.160705
1616	mask_01623-05-011_34,png	0.109495	0.010957	1.14361	0.126889
1617	mask_01623-05-011_35,png	0.104143	0.0106839	1.19467	0.129859
1618	mask_01623-05-011_36,png	0.0696517	0.00414073	1.05985	0.0777153
1619	mask_01623-05-011_37,png	0.0671642	0.00460481	1.19108	0.0862882
1620	mask_01623-05-011_38,png	0.0988042	0.0081744	1.10174	0.111064
1621	mask_01623-05-011_39,png	0.0820896	0.00560722	1.024	0.0885321
1622	mask_01623-05-011_4,png	0.0895522	0.00734939	1.12922	0.104393
1623	mask_01623-05-011_40,png	0.117788	0.0116521	1.05807	0.129192
1624	mask_01623-05-011_41,png	0.147464	0.0193595	1.1275	0.170799
1625	mask_01623-05-011_42,png	0.133979	0.0206857	1.59855	0.204527
1626	mask_01623-05-011_43,png	0.0870647	0.00652078	1.02972	0.0965589
1627	mask_01623-05-011_44,png	0.137477	0.0199115	1.26233	0.187405
1628	mask_01623-05-011_45,png	0.0945274	0.0079031	1.09103	0.110046
1629	mask_01623-05-011_47,png	0.104478	0.0102686	1.22631	0.132742
1630	mask_01623-05-011_48,png	0.161781	0.0285215	1.35141	0.224164
1631	mask_01623-05-011_49,png	0.143192	0.0211842	1.3688	0.199868
1632	mask_01623-05-011_5,png	0.0741786	0.0045351	1.04227	0.0796386
1633	mask_01623-05-011_50,png	0.0995025	0.0081921	1.04538	0.112363
1634	mask_01623-05-011_51,png	0.0545427	0.00271985	1.17101	0.0650753
1635	mask_01623-05-011_52,png	0.172832	0.0301684	1.3052	0.237329
1636	mask_01623-05-011_53,png	0.08736	0.0067321	1.17476	0.105519
1637	mask_01623-05-011_54,png	0.0696517	0.0044248	1.18522	0.0862882
1638	mask_01623-05-011_55,png	0.145614	0.021052	1.24526	0.187871
1639	mask_01623-05-011_56,png	0.10584	0.00942141	1.15582	0.124043
1640	mask_01623-05-011_57,png	0.0721393	0.00412915	1.02022	0.0763571
1641	mask_01623-05-011_58,png	0.156702	0.0228427	1.19579	0.189453
1642	mask_01623-05-011_59,png	0.114428	0.0124136	1.1911	0.140606
1643	mask_01623-05-011_6,png	0.0895522	0.00799154	1.17363	0.110663
1644	mask_01623-05-011_60,png	0.0656914	0.00401339	1.20473	0.0820896
1645	mask_01623-05-011_61,png	0.10403	0.00968785	1.17119	0.122547
1646	mask_01623-05-011_62,png	0.160335	0.0265625	1.35921	0.224448
1647	mask_01623-05-011_64,png	0.122282	0.0148164	1.37867	0.166577
1648	mask_01623-05-011_65,png	0.0820896	0.00595814	1.10085	0.0963148
1649	mask_01623-05-011_66,png	0.0597015	0.00300569	1.02374	0.0654277
1650	mask_01623-05-011_67,png	0.191817	0.0347649	1.19502	0.234672
1651	mask_01623-05-011_68,png	0.144279	0.0174358	1.06236	0.161413
1652	mask_01623-05-011_69,png	0.0995025	0.0103635	1.25658	0.129859
1653	mask_01623-05-011_7,png	0.124378	0.0162628	1.25118	0.162857
1654	mask_01623-05-011_70,png	0.152832	0.0223919	1.34496	0.207562
1655	mask_01623-05-011_71,png	0.0870647	0.00676146	1.08323	0.101845
1656	mask_01623-05-011_72,png	0.164179	0.0258517	1.20338	0.205176
1657	mask_01623-05-011_73,png	0.146766	0.0196535	1.18188	0.178313
1658	mask_01623-05-011_74,png	0.0572139	0.00304579	1.15847	0.0684817
1659	mask_01623-05-011_75,png	0.0817228	0.00611625	1.204	0.101381
1660	mask_01623-05-011_76,png	0.0945274	0.00882991	1.21592	0.119353
1661	mask_01623-05-011_77,png	0.0547264	0.00267422	1.11349	0.0634667
1662	mask_01623-05-011_78,png	0.127152	0.0148045	1.19157	0.156716
1663	mask_01623-05-011_79,png	0.0920398	0.00799744	1.18198	0.114246
1664	mask_01623-05-011_8,png	0.0820896	0.00564228	1.06658	0.0910461
1665	mask_01623-05-011_80,png	0.120919	0.0131283	1.20591	0.146583
1666	mask_01623-05-011_81,png	0.138941	0.0207758	1.43588	0.200049
1667	mask_01623-05-011_82,png	0.0945274	0.00754367	1.05277	0.104732
1668	mask_01623-05-011_83,png	0.0845771	0.00638586	1.09447	0.0982212
1669	mask_01623-05-011_84,png	0.079602	0.0105296	2.01119	0.165291
1670	mask_01623-05-011_85,png	0.176617	0.0261769	1.01864	0.18864
1671	mask_01623-05-011_86,png	0.116915	0.0128661	1.19248	0.145599
1672	mask_01623-05-011_87,png	0.0950441	0.00987741	1.33048	0.130568
1673	mask_01623-05-011_88,png	0.104081	0.0107967	1.34193	0.140073
1674	mask_01623-05-011_89,png	0.0995025	0.00775574	1.03732	0.107736
1675	mask_01623-05-011_9,png	0.124536	0.016203	1.2663	0.161096
1676	mask_01623-05-011_90,png	0.129353	0.0142135	1.09071	0.145312
1677	mask_01623-05-011_91,png	0.116915	0.0120446	1.09635	0.134417
1678	mask_01623-05-011_92,png	0.0671427	0.0041581	1.17891	0.0809449
1679	mask_01623-05-011_94,png	0.0845771	0.00791489	1.38971	0.120887
1680	mask_01623-05-011_95,png	0.0845771	0.00616897	1.10281	0.0966502
1681	mask_01623-05-011_96,png	0.106389	0.0111767	1.34632	0.14405
1682	mask_01623-05-011_97,png	0.0597015	0.00303433	1.03944	0.0654277
1683	mask_01623-05-011_99,png	0.0636248	0.00396133	1.22976	0.0812683
1684	mask_01623-05-012_0,png	0.158961	0.0233058	1.15293	0.188544
1685	mask_01623-05-012_1,png	0.0776966	0.00518108	1.04628	0.0847152
1686	mask_01623-05-012_10,png	0.0870647	0.00725524	1.13527	0.104506
1695	mask_01623-05-012_11,png	0.148055	0.017831	1.05012	0.158012
1705	mask_01623-05-012_12,png	0.132836	0.0180767	1.23463	0.171712
1713	mask_01623-05-012_13,png	0.187562	0.0314361	1.10916	0.213251
1719	mask_01623-05-012_14,png	0.0936416	0.00839868	1.20878	0.115793
1729	mask_01623-05-012_15,png	0.154108	0.021064	1.11724	0.17444
1738	mask_01623-05-012_16,png	0.151883	0.0193295	1.07905	0.168888
1747	mask_01623-05-012_17,png	0.18408	0.0308806	1.11712	0.21788
1748	mask_01623-05-012_18,png	0.0962273	0.00776163	1.0817	0.107846
1749	mask_01623-05-012_19,png	0.11194	0.0112361	1.11784	0.130409
1750	mask_01623-05-012_2,png	0.131859	0.0149239	1.09297	0.146521
1751	mask_01623-05-012_20,png	0.151741	0.0193295	1.05139	0.167816
1752	mask_01623-05-012_21,png	0.189055	0.0426812	1.36531	0.271905
1753	mask_01623-05-012_22,png	0.164309	0.0232697	1.13627	0.187871
1754	mask_01623-05-012_23,png	0.111117	0.0104406	1.05177	0.121866
1755	mask_01623-05-012_24,png	0.116915	0.0123064	1.09682	0.133191
1756	mask_01623-05-012_25,png	0.0746269	0.00486068	1.08433	0.0851969
1757	mask_01623-05-012_26,png	0.0995025	0.00865854	1.10608	0.112125
1758	mask_01623-05-012_27,png	0.150682	0.0212622	1.2288	0.186971
1759	mask_01623-05-012_28,png	0.148419	0.0215926	1.18408	0.185287
1760	mask_01623-05-012_29,png	0.0970149	0.00886538	1.14585	0.117017
1761	mask_01623-05-012_3,png	0.0895522	0.00743768	1.19369	0.110261
1762	mask_01623-05-012_30,png	0.106181	0.0114916	1.27733	0.138551
1763	mask_01623-05-012_31,png	0.0970149	0.0105	1.37515	0.137512
1764	mask_01623-05-012_32,png	0.183865	0.0350249	1.33895	0.252701
1765	mask_01623-05-012_33,png	0.0696517	0.00467455	1.16648	0.0864914
1766	mask_01623-05-012_35,png	0.136816	0.0154019	1.05979	0.147762
1767	mask_01623-05-012_36,png	0.0746269	0.00495383	1.09091	0.0851625
1768	mask_01623-05-012_37,png	0.0895522	0.00712583	1.0553	0.102653
1769	mask_01623-05-012_38,png	0.102653	0.00901319	1.07633	0.11448
1770	mask_01623-05-012_39,png	0.21815	0.0441052	1.2211	0.278781
1771	mask_01623-05-012_4,png	0.0845771	0.00643278	1.0616	0.0975897
1772	mask_01623-05-012_40,png	0.144279	0.0217849	1.27615	0.194604
1773	mask_01623-05-012_41,png	0.167404	0.0237389	1.06697	0.187534
1774	mask_01623-05-012_43,png	0.140422	0.0190537	1.18192	0.16997
1775	mask_01623-05-012_44,png	0.134392	0.0169568	1.22766	0.166215
1776	mask_01623-05-012_45,png	0.079602	0.0056832	1.12708	0.0929287
1777	mask_01623-05-012_46,png	0.126866	0.0153242	1.15449	0.152352
1778	mask_01623-05-012_47,png	0.109453	0.010156	1.09623	0.124879
1779	mask_01623-05-012_48,png	0.0895522	0.00703176	1.07417	0.0996505
1780	mask_01623-05-012_49,png	0.0895522	0.00739647	1.15747	0.105966
1781	mask_01623-05-012_5,png	0.111117	0.0105949	1.07084	0.124306
1782	mask_01623-05-012_50,png	0.155091	0.0207458	1.10709	0.17811
1783	mask_01623-05-012_52,png	0.117018	0.013462	1.2498	0.146276
1784	mask_01623-05-012_53,png	0.151976	0.0194675	1.15142	0.177229
1785	mask_01623-05-012_54,png	0.169154	0.028015	1.31294	0.226742
1786	mask_01623-05-012_56,png	0.169163	0.0246475	1.12094	0.191684
1787	mask_01623-05-012_57,png	0.0933694	0.00885356	1.28499	0.122547
1788	mask_01623-05-012_58,png	0.104478	0.00964639	1.10019	0.122499
1789	mask_01623-05-012_6,png	0.0952863	0.00861719	1.26492	0.12245
1790	mask_01623-05-012_60,png	0.105944	0.0107967	1.15612	0.128984
1791	mask_01623-05-012_61,png	0.104478	0.0109332	1.27398	0.13827
1792	mask_01623-05-012_63,png	0.0994928	0.00932671	1.23108	0.124306
1793	mask_01623-05-012_64,png	0.0970453	0.0088772	1.16819	0.117523
1794	mask_01623-05-012_65,png	0.108077	0.0106839	1.1282	0.125355
1795	mask_01623-05-012_68,png	0.126866	0.0137184	1.06348	0.142212
1796	mask_01623-05-012_69,png	0.104081	0.00967008	1.12338	0.1198
1797	mask_01623-05-012_7,png	0.141791	0.0177711	1.11754	0.163372
1798	mask_01623-05-012_70,png	0.123845	0.0123838	1.02611	0.130409
1799	mask_01623-05-012_71,png	0.150374	0.0226203	1.3057	0.192547
1800	mask_01623-05-012_72,png	0.134117	0.0183343	1.25374	0.173732
1801	mask_01623-05-012_73,png	0.134084	0.015892	1.10886	0.154248
1802	mask_01623-05-012_74,png	0.0870647	0.00694359	1.1177	0.104251
1803	mask_01623-05-012_75,png	0.139303	0.0168132	1.08847	0.16171
1804	mask_01623-05-012_76,png	0.0756219	0.00521024	1.19393	0.0916243
1805	mask_01623-05-012_77,png	0.116915	0.0114025	1.09291	0.131115
1806	mask_01623-05-012_78,png	0.106965	0.010156	1.13074	0.125379
1807	mask_01623-05-012_8,png	0.128707	0.0153003	1.13619	0.15087
1808	mask_01623-05-012_80,png	0.0784602	0.00574752	1.21636	0.0957635
1809	mask_01623-05-012_81,png	0.0621891	0.00341329	1.09875	0.0736885
1810	mask_01623-05-012_82,png	0.15507	0.0252374	1.2546	0.20306
1811	mask_01623-05-012_83,png	0.174295	0.0303374	1.3829	0.242196
1812	mask_01623-05-012_84,png	0.119403	0.0140584	1.28575	0.159298
1813	mask_01623-05-012_85,png	0.0820896	0.00660294	1.20084	0.105519
1814	mask_01623-05-012_86,png	0.151415	0.0203076	1.22176	0.194728
1815	mask_01623-05-012_87,png	0.104478	0.00907232	1.05809	0.114142
1816	mask_01623-05-012_88,png	0.126866	0.0139391	1.06694	0.145373
1817	mask_01623-05-012_9,png	0.080496	0.00546701	1.08406	0.0887964
1818	mask_01623-05-012_90,png	0.121681	0.0127589	1.0817	0.138745
1819	mask_01623-05-012_91,png	0.0812145	0.00532691	1.04733	0.087601
1820	mask_01623-05-012_92,png	0.158609	0.0229991	1.20863	0.191605
1821	mask_01623-05-012_93,png	0.0755613	0.00666164	1.56468	0.117927
1822	mask_01623-05-012_94,png	0.137299	0.0181546	1.27474	0.174716
1826	mask_01623-05-013_0,png	0.112935	0.0110282	1.1128	0.128915
1827	mask_01623-05-013_1,png	0.112312	0.0118008	1.15108	0.132742
1828	mask_01623-05-013_10,png	0.0923044	0.00764969	1.14854	0.110984
1829	mask_01623-05-013_100,png	0.114428	0.0136111	1.29626	0.151168
1830	mask_01623-05-013_101,png	0.126866	0.0151091	1.20413	0.154946
1831	mask_01623-05-013_102,png	0.109453	0.0115986	1.21382	0.136204
1832	mask_01623-05-013_103,png	0.121891	0.0143209	1.20031	0.151583
1833	mask_01623-05-013_104,png	0.119208	0.0129555	1.15167	0.140073
1834	mask_01623-05-013_105,png	0.119403	0.0145418	1.23129	0.155564
1835	mask_01623-05-013_106,png	0.101221	0.01015	1.23598	0.127778
1836	mask_01623-05-013_107,png	0.171642	0.0285396	1.30676	0.227555
1837	mask_01623-05-013_109,png	0.0860697	0.00655012	1.1736	0.102106
1838	mask_01623-05-013_11,png	0.0970149	0.00866445	1.24094	0.124306
1839	mask_01623-05-013_110,png	0.049553	0.00208412	1.06035	0.0548299
1840	mask_01623-05-013_111,png	0.148928	0.0200555	1.16145	0.17566
1841	mask_01623-05-013_112,png	0.156716	0.0215926	1.06309	0.179926
1842	mask_01623-05-013_113,png	0.10398	0.010405	1.25618	0.132022
1843	mask_01623-05-013_114,png	0.136014	0.015892	1.19939	0.168264
1844	mask_01623-05-013_115,png	0.0646766	0.00465712	1.34511	0.0930235
1845	mask_01623-05-013_116,png	0.0820896	0.00667338	1.21754	0.107434
1846	mask_01623-05-013_117,png	0.143743	0.0191017	1.22725	0.180678
1847	mask_01623-05-013_118,png	0.0970149	0.00836916	1.09539	0.111834
1848	mask_01623-05-013_12,png	0.10199	0.00924387	1.10586	0.11775
1849	mask_01623-05-013_121,png	0.103803	0.00921429	1.04744	0.115383
1850	mask_01623-05-013_122,png	0.10199	0.00886538	1.16249	0.117901
1851	mask_01623-05-013_123,png	0.124805	0.0140166	1.17988	0.149914
1852	mask_01623-05-013_124,png	0.11466	0.01236	1.18582	0.139945
1853	mask_01623-05-013_125,png	0.0653973	0.0038804	1.18482	0.0796386
1854	mask_01623-05-013_126,png	0.0671642	0.0042624	1.09879	0.0816621
1855	mask_01623-05-013_127,png	0.0597015	0.00310311	1.06995	0.0688598
1856	mask_01623-05-013_128,png	0.0832685	0.00612211	1.1181	0.0957635
1857	mask_01623-05-013_13,png	0.0914165	0.00708467	1.10068	0.104732
1858	mask_01623-05-013_130,png	0.0696517	0.00468618	1.31303	0.094434
1864	mask_01623-05-013_14,png	0.126154	0.0143747	1.15213	0.147011
1874	mask_01623-05-013_15,png	0.119403	0.0140345	1.22258	0.155468
1884	mask_01623-05-013_16,png	0.0952863	0.00768503	1.15043	0.112363
1893	mask_01623-05-013_17,png	0.163886	0.0225241	1.06027	0.178515
1901	mask_01623-05-013_18,png	0.0935273	0.00759078	1.11933	0.107407
1910	mask_01623-05-013_19,png	0.189766	0.0366757	1.26852	0.249292
1921	mask_01623-05-013_2,png	0.119403	0.0121815	1.05602	0.130363
1922	mask_01623-05-013_20,png	0.149814	0.0181246	1.02605	0.158088
1941	mask_01623-05-013_22,png	0.0945274	0.0081508	1.06921	0.109696
1948	mask_01623-05-013_23,png	0.0547264	0.00401339	1.57436	0.0900745
1949	mask_01623-05-013_24,png	0.0895522	0.00713171	1.10045	0.103141
1950	mask_01623-05-013_25,png	0.0920398	0.008139	1.15176	0.111967
1951	mask_01623-05-013_26,png	0.0995025	0.0104228	1.38016	0.137881
1952	mask_01623-05-013_27,png	0.114428	0.0107729	1.02119	0.12308
1953	mask_01623-05-013_28,png	0.149055	0.0211061	1.25453	0.190073
1954	mask_01623-05-013_29,png	0.129353	0.015611	1.18378	0.156716
1955	mask_01623-05-013_3,png	0.11194	0.0119792	1.16231	0.136204
1956	mask_01623-05-013_30,png	0.0716175	0.00419286	1.08857	0.0786455
1957	mask_01623-05-013_31,png	0.0870647	0.00681432	1.09165	0.0999752
1958	mask_01623-05-013_32,png	0.0696517	0.00436678	1.11274	0.082054
1959	mask_01623-05-013_33,png	0.149254	0.0191316	1.11814	0.172062
1960	mask_01623-05-013_34,png	0.206102	0.0351579	1.07247	0.226382
1961	mask_01623-05-013_35,png	0.12246	0.0144642	1.22068	0.149974
1962	mask_01623-05-013_36,png	0.0636248	0.00385151	1.16943	0.0791986
1963	mask_01623-05-013_37,png	0.11194	0.0115451	1.19152	0.138529
1964	mask_01623-05-013_38,png	0.11194	0.0109332	1.07718	0.124879
1965	mask_01623-05-013_39,png	0.0571182	0.00320639	1.22749	0.0730963
1966	mask_01623-05-013_4,png	0.0646766	0.00377065	1.1277	0.0773778
1967	mask_01623-05-013_40,png	0.0686567	0.00396133	1.09375	0.0763571
1968	mask_01623-05-013_41,png	0.0671642	0.00393242	1.04738	0.0765092
1969	mask_01623-05-013_42,png	0.136816	0.0160774	1.09137	0.156429
1970	mask_01623-05-013_43,png	0.125184	0.0147328	1.21258	0.154307
1971	mask_01623-05-013_44,png	0.0945274	0.0081331	1.0998	0.111967
1972	mask_01623-05-013_45,png	0.0870647	0.00785004	1.29415	0.11873
1973	mask_01623-05-013_46,png	0.119403	0.0136409	1.21566	0.148872
1974	mask_01623-05-013_47,png	0.0952863	0.00769092	1.06347	0.105435
1975	mask_01623-05-013_48,png	0.167266	0.025936	1.14873	0.196625
1976	mask_01623-05-013_49,png	0.178262	0.0282562	1.14564	0.214156
1977	mask_01623-05-013_5,png	0.10199	0.0100315	1.21904	0.129652
1978	mask_01623-05-013_50,png	0.081557	0.00536193	1.01722	0.0867954
1979	mask_01623-05-013_51,png	0.0970149	0.00878263	1.20099	0.120985
1980	mask_01623-05-013_52,png	0.152514	0.020986	1.1229	0.177484
1981	mask_01623-05-013_53,png	0.119403	0.0124076	1.06787	0.133794
1982	mask_01623-05-013_54,png	0.160407	0.0262673	1.29089	0.210999
1983	mask_01623-05-013_55,png	0.0971339	0.00917288	1.21466	0.124091
1984	mask_01623-05-013_56,png	0.119403	0.0119138	1.05284	0.132022
1985	mask_01623-05-013_57,png	0.138909	0.0182325	1.15344	0.167386
1986	mask_01623-05-013_59,png	0.136231	0.0181725	1.17711	0.168798
1987	mask_01623-05-013_6,png	0.0935273	0.00753778	1.08152	0.105435
1988	mask_01623-05-013_60,png	0.106965	0.0133249	1.44585	0.160406
1989	mask_01623-05-013_61,png	0.139303	0.0181725	1.22281	0.171221
1990	mask_01623-05-013_62,png	0.0920398	0.00703763	1.05595	0.101874
1991	mask_01623-05-013_63,png	0.134328	0.0168491	1.18868	0.164197
1992	mask_01623-05-013_64,png	0.134328	0.0165858	1.22165	0.165055
1993	mask_01623-05-013_65,png	0.0721393	0.00540862	1.28794	0.0943406
1994	mask_01623-05-013_66,png	0.0970149	0.00888903	1.08845	0.114246
1995	mask_01623-05-013_68,png	0.114428	0.011884	1.15731	0.135236
1996	mask_01623-05-013_69,png	0.134775	0.0163944	1.17836	0.160125
1997	mask_01623-05-013_7,png	0.126866	0.0149956	1.13036	0.147234
1998	mask_01623-05-013_70,png	0.112876	0.0110995	1.13668	0.131637
1999	mask_01623-05-013_71,png	0.124072	0.0140107	1.14948	0.14562
2000	mask_01623-05-013_72,png	0.154229	0.0204516	1.12688	0.177229
2001	mask_01623-05-013_73,png	0.0522388	0.00239543	1.10306	0.0596057
2002	mask_01623-05-013_74,png	0.112876	0.0121041	1.21702	0.143489
2003	mask_01623-05-013_75,png	0.101507	0.00885356	1.06543	0.115357
2004	mask_01623-05-013_76,png	0.139303	0.0167713	1.11379	0.159015
2005	mask_01623-05-013_77,png	0.125184	0.0159458	1.25162	0.1648
2006	mask_01623-05-013_78,png	0.0696053	0.00469781	1.27538	0.0907233
2007	mask_01623-05-013_79,png	0.166936	0.024503	1.10039	0.195579
2008	mask_01623-05-013_8,png	0.104478	0.00948652	1.04413	0.117523
2009	mask_01623-05-013_80,png	0.0755244	0.00515193	1.15664	0.0902371
2010	mask_01623-05-013_81,png	0.104367	0.0109213	1.29256	0.136663
2011	mask_01623-05-013_82,png	0.126866	0.0133309	1.03391	0.135479
2012	mask_01623-05-013_83,png	0.114428	0.0123838	1.155	0.140073
2013	mask_01623-05-013_85,png	0.114428	0.0133607	1.35064	0.155622
2014	mask_01623-05-013_86,png	0.149657	0.0180048	1.02011	0.161022
2015	mask_01623-05-013_87,png	0.134787	0.0179868	1.3585	0.181077
2016	mask_01623-05-013_88,png	0.107082	0.0111173	1.26674	0.137773
2017	mask_01623-05-013_89,png	0.171642	0.0321849	1.36755	0.236023
2018	mask_01623-05-013_9,png	0.0706607	0.00423342	1.07784	0.0791986
2019	mask_01623-05-013_90,png	0.0995025	0.00965231	1.22365	0.126301
2020	mask_01623-05-013_91,png	0.106965	0.00947468	1.04038	0.118755
2021	mask_01623-05-013_92,png	0.0988042	0.00878263	1.15193	0.118529
2022	mask_01623-05-013_93,png	0.104047	0.00969969	1.108	0.119701
2023	mask_01623-05-013_94,png	0.136816	0.0191077	1.29353	0.181459
2024	mask_01623-05-013_96,png	0.166946	0.0239013	1.10714	0.186195
2025	mask_01623-05-013_97,png	0.142172	0.0191196	1.24533	0.1766
2026	mask_01623-05-014_0,png	0.107599	0.0100671	1.12305	0.122887
2027	mask_01623-05-014_1,png	0.0621891	0.00355724	1.09013	0.0721794
2028	mask_01623-05-014_10,png	0.079602	0.00575337	1.13776	0.0985505
2029	mask_01623-05-014_101,png	0.108942	0.00986556	1.0885	0.120911
2030	mask_01623-05-014_102,png	0.0812145	0.005578	1.06592	0.0897484
2031	mask_01623-05-014_103,png	0.0662231	0.0042624	1.24968	0.0854709
2032	mask_01623-05-014_104,png	0.126777	0.0174537	1.35801	0.181127
2033	mask_01623-05-014_105,png	0.146583	0.018682	1.2051	0.174406
2034	mask_01623-05-014_106,png	0.139261	0.0180946	1.29526	0.187614
2035	mask_01623-05-014_107,png	0.0995025	0.00889494	1.14151	0.118103
2036	mask_01623-05-014_108,png	0.121891	0.0135634	1.10553	0.139945
2037	mask_01623-05-014_11,png	0.0671642	0.00408862	1.13666	0.0784232
2038	mask_01623-05-014_110,png	0.150055	0.0220733	1.26557	0.200516
2039	mask_01623-05-014_113,png	0.0784602	0.00587621	1.29113	0.102653
2040	mask_01623-05-014_114,png	0.0945274	0.010239	1.3936	0.137773
2041	mask_01623-05-014_115,png	0.149254	0.0223137	1.23021	0.188879
2042	mask_01623-05-014_116,png	0.0995025	0.00926754	1.2581	0.123442
2043	mask_01623-05-014_117,png	0.166667	0.0268095	1.2193	0.211457
2044	mask_01623-05-014_118,png	0.0820896	0.00629205	1.15291	0.0996505
2045	mask_01623-05-014_119,png	0.160721	0.0266167	1.46146	0.229767
2046	mask_01623-05-014_12,png	0.12343	0.0161731	1.32512	0.168888
2047	mask_01623-05-014_120,png	0.109453	0.0102449	1.13518	0.126678
2048	mask_01623-05-014_121,png	0.0833338	0.00598156	1.17806	0.0999752
2049	mask_01623-05-014_122,png	0.11194	0.010672	1.02865	0.125947
2050	mask_01623-05-014_123,png	0.106965	0.010583	1.10764	0.123538
2051	mask_01623-05-014_124,png	0.0920398	0.00787362	1.21681	0.117144
2052	mask_01623-05-014_125,png	0.057158	0.00317195	1.20308	0.0709669
2053	mask_01623-05-014_128,png	0.068448	0.00516942	1.36361	0.0965589
2054	mask_01623-05-014_129,png	0.0690762	0.00484322	1.31234	0.094434
2055	mask_01623-05-014_13,png	0.101822	0.00942141	1.22699	0.124306
2056	mask_01623-05-014_130,png	0.0771144	0.00505868	1.06643	0.0867954
2057	mask_01623-05-014_131,png	0.112049	0.0135813	1.39083	0.15708
2058	mask_01623-05-014_132,png	0.0895522	0.00711407	1.13873	0.105491
2059	mask_01623-05-014_133,png	0.0945274	0.00988334	1.36066	0.135479
2060	mask_01623-05-014_134,png	0.101762	0.0100137	1.22149	0.126372
2061	mask_01623-05-014_135,png	0.115524	0.0135872	1.27032	0.152136
2062	mask_01623-05-014_136,png	0.0895522	0.00875899	1.40112	0.128753
2063	mask_01623-05-014_137,png	0.104081	0.00898953	1.16615	0.11661
2064	mask_01623-05-014_138,png	0.0522388	0.00257167	1.18793	0.0643203
2065	mask_01623-05-014_14,png	0.0845771	0.00898362	1.44079	0.131115
2075	mask_01623-05-014_15,png	0.112312	0.010767	1.06009	0.124306
2094	mask_01623-05-014_17,png	0.0791037	0.00623343	1.33196	0.106272
2104	mask_01623-05-014_18,png	0.231981	0.0459238	1.08278	0.258765
2115	mask_01623-05-014_19,png	0.106965	0.0104525	1.14111	0.127241
2124	mask_01623-05-014_2,png	0.0806852	0.00595814	1.22869	0.0999752
2125	mask_01623-05-014_20,png	0.0696517	0.00427979	1.0652	0.0784232
2135	mask_01623-05-014_21,png	0.0696517	0.00474433	1.15119	0.0851969
2145	mask_01623-05-014_22,png	0.0817258	0.00580015	1.1121	0.0921673
2156	mask_01623-05-014_23,png	0.114428	0.0115451	1.09004	0.133191
2165	mask_01623-05-014_24,png	0.121965	0.0158322	1.25424	0.158713
2169	mask_01623-05-014_25,png	0.190271	0.0316414	1.11753	0.217589
2170	mask_01623-05-014_26,png	0.128707	0.0138257	1.04843	0.139903
2171	mask_01623-05-014_27,png	0.0945274	0.00787362	1.07691	0.107434
2172	mask_01623-05-014_28,png	0.104478	0.00943325	1.10127	0.117927
2173	mask_01623-05-014_29,png	0.132225	0.0169748	1.2212	0.165527
2174	mask_01623-05-014_3,png	0.116915	0.013468	1.16385	0.144113
2175	mask_01623-05-014_30,png	0.1165	0.0148344	1.45321	0.1648
2176	mask_01623-05-014_31,png	0.191457	0.0362282	1.27398	0.24973
2177	mask_01623-05-014_32,png	0.0870647	0.00683195	1.05394	0.0985804
2178	mask_01623-05-014_33,png	0.102653	0.0105178	1.28112	0.135853
2179	mask_01623-05-014_34,png	0.113493	0.010494	1.0274	0.122547
2180	mask_01623-05-014_35,png	0.117832	0.012116	1.13231	0.133839
2181	mask_01623-05-014_36,png	0.106727	0.0103101	1.15987	0.126301
2182	mask_01623-05-014_37,png	0.129353	0.0157306	1.16844	0.155043
2183	mask_01623-05-014_38,png	0.0970149	0.00856403	1.11727	0.11661
2184	mask_01623-05-014_39,png	0.118153	0.0120149	1.10748	0.133839
2185	mask_01623-05-014_4,png	0.104478	0.0102153	1.18796	0.125758
2186	mask_01623-05-014_40,png	0.113586	0.0141479	1.43277	0.1652
2187	mask_01623-05-014_41,png	0.144538	0.020974	1.21647	0.181592
2188	mask_01623-05-014_42,png	0.106785	0.0113609	1.21803	0.134439
2189	mask_01623-05-014_43,png	0.110932	0.0105711	1.10452	0.124378
2190	mask_01623-05-014_44,png	0.0948673	0.00767325	1.09364	0.106411
2191	mask_01623-05-014_45,png	0.0572139	0.00319491	1.15964	0.0716563
2192	mask_01623-05-014_46,png	0.0995972	0.0115986	1.39892	0.143489
2193	mask_01623-05-014_47,png	0.104033	0.0102983	1.26348	0.133727
2194	mask_01623-05-014_48,png	0.12139	0.01413	1.26919	0.154171
2195	mask_01623-05-014_49,png	0.177958	0.0267011	1.11151	0.200907
2196	mask_01623-05-014_5,png	0.0842048	0.00586451	1.08764	0.0937783
2197	mask_01623-05-014_51,png	0.124378	0.0135455	1.07119	0.138573
2198	mask_01623-05-014_52,png	0.106965	0.0106483	1.19773	0.133012
2199	mask_01623-05-014_53,png	0.135526	0.0183283	1.27268	0.173159
2200	mask_01623-05-014_54,png	0.119403	0.0125445	1.01556	0.138809
2201	mask_01623-05-014_55,png	0.128521	0.0144343	1.14293	0.149334
2202	mask_01623-05-014_56,png	0.178091	0.02693	1.13039	0.207533
2203	mask_01623-05-014_57,png	0.0522388	0.00243518	1.08402	0.0606984
2204	mask_01623-05-014_58,png	0.0696517	0.0048374	1.20577	0.0879013
2205	mask_01623-05-014_59,png	0.0970149	0.00902501	1.11718	0.117523
2206	mask_01623-05-014_6,png	0.0870647	0.0068672	1.1033	0.103398
2207	mask_01623-05-014_60,png	0.104478	0.00953388	1.11468	0.117144
2208	mask_01623-05-014_61,png	0.118177	0.0143568	1.29064	0.15541
2209	mask_01623-05-014_62,png	0.136523	0.0194615	1.30157	0.180778
2210	mask_01623-05-014_63,png	0.0915423	0.00736116	1.15238	0.107269
2211	mask_01623-05-014_64,png	0.105681	0.0108323	1.31502	0.136466
2212	mask_01623-05-014_65,png	0.167404	0.0271651	1.15761	0.209735
2213	mask_01623-05-014_66,png	0.113807	0.0131461	1.28803	0.151247
2214	mask_01623-05-014_67,png	0.152807	0.0215686	1.15299	0.183588
2215	mask_01623-05-014_68,png	0.0771144	0.0056189	1.18558	0.0949308
2216	mask_01623-05-014_69,png	0.150779	0.0217308	1.20361	0.185806
2217	mask_01623-05-014_7,png	0.0995025	0.0090605	1.12678	0.117397
2218	mask_01623-05-014_70,png	0.0970149	0.00836916	1.02577	0.108965
2219	mask_01623-05-014_71,png	0.0845771	0.00587036	1.07447	0.0929287
2220	mask_01623-05-014_72,png	0.10584	0.0101263	1.15891	0.126372
2221	mask_01623-05-014_73,png	0.126866	0.0183943	1.3968	0.183981
2222	mask_01623-05-014_75,png	0.111285	0.0124136	1.27735	0.147498
2223	mask_01623-05-014_76,png	0.114428	0.0106898	1.04143	0.124115
2224	mask_01623-05-014_77,png	0.0995025	0.00932671	1.07384	0.117422
2225	mask_01623-05-014_79,png	0.164179	0.0222596	1.07231	0.180678
2226	mask_01623-05-014_8,png	0.18408	0.0298788	1.10368	0.210985
2227	mask_01623-05-014_80,png	0.144046	0.0252796	1.52729	0.222062
2228	mask_01623-05-014_81,png	0.103803	0.010951	1.30965	0.136838
2229	mask_01623-05-014_82,png	0.114428	0.0129078	1.15029	0.146133
2230	mask_01623-05-014_83,png	0.0870647	0.00646211	1.02625	0.0953017
2231	mask_01623-05-014_84,png	0.178181	0.0270385	1.12583	0.20547
2232	mask_01623-05-014_85,png	0.108025	0.0141897	1.38502	0.155256
2233	mask_01623-05-014_86,png	0.0746269	0.00488978	1.11663	0.0862543
2234	mask_01623-05-014_87,png	0.0621891	0.0039093	1.27983	0.0815549
2235	mask_01623-05-014_88,png	0.0740104	0.00504702	1.23443	0.0931497
2236	mask_01623-05-014_89,png	0.0741786	0.00560137	1.30682	0.100005
2237	mask_01623-05-014_9,png	0.0900094	0.00761434	1.14758	0.106411
2238	mask_01623-05-014_90,png	0.116915	0.0117056	1.08603	0.134417
2239	mask_01623-05-014_91,png	0.183495	0.0373956	1.42401	0.269176
2240	mask_01623-05-014_92,png	0.0920398	0.00773806	1.10178	0.106827
2241	mask_01623-05-014_93,png	0.121686	0.0149896	1.27446	0.157689
2242	mask_01623-05-014_95,png	0.164179	0.0257613	1.14352	0.199202
2243	mask_01623-05-014_96,png	0.112947	0.0126458	1.27275	0.144796
2244	mask_01623-05-014_97,png	0.104478	0.0123898	1.36678	0.151662
2245	mask_01623-05-014_98,png	0.0721393	0.00500624	1.23796	0.0920398
2246	mask_01623-05-014_99,png	0.0820896	0.00633308	1.10142	0.100856
2247	mask_01623-05-015_0,png	0.111117	0.0112896	1.15232	0.132405
2248	mask_01623-05-015_1,png	0.116915	0.0111886	1.02258	0.123538
2249	mask_01623-05-015_10,png	0.094141	0.00858765	1.23168	0.117523
2250	mask_01623-05-015_100,png	0.0845771	0.00595229	1.07142	0.0923264
2251	mask_01623-05-015_101,png	0.0771978	0.0053736	1.12611	0.0897484
2252	mask_01623-05-015_102,png	0.172156	0.0251471	1.06153	0.191164
2253	mask_01623-05-015_103,png	0.0782874	0.00580015	1.24157	0.0986998
2254	mask_01623-05-015_104,png	0.130954	0.016508	1.25585	0.163391
2255	mask_01623-05-015_105,png	0.0847325	0.00735527	1.23075	0.108584
2256	mask_01623-05-015_107,png	0.11194	0.0118305	1.12892	0.135081
2257	mask_01623-05-015_108,png	0.0664387	0.00389196	1.19943	0.0799306
2258	mask_01623-05-015_11,png	0.133984	0.0166576	1.14139	0.158713
2259	mask_01623-05-015_110,png	0.116915	0.0123957	1.16233	0.136838
2260	mask_01623-05-015_111,png	0.160296	0.021845	1.09455	0.18011
2261	mask_01623-05-015_112,png	0.149424	0.021851	1.1986	0.184472
2262	mask_01623-05-015_113,png	0.114428	0.0111411	1.02896	0.124402
2263	mask_01623-05-015_114,png	0.122839	0.0130746	1.10834	0.138573
2264	mask_01623-05-015_115,png	0.147643	0.0207098	1.17599	0.183062
2265	mask_01623-05-015_116,png	0.186587	0.0327828	1.14398	0.226301
2266	mask_01623-05-015_117,png	0.0646766	0.00403653	1.10388	0.076014
2267	mask_01623-05-015_118,png	0.0995025	0.00916696	1.16531	0.11873
2268	mask_01623-05-015_119,png	0.140314	0.0211421	1.39343	0.201133
2269	mask_01623-05-015_12,png	0.116915	0.014709	1.25481	0.153469
2270	mask_01623-05-015_120,png	0.0460351	0.00187581	1.1049	0.0539964
2271	mask_01623-05-015_122,png	0.112876	0.0119911	1.26358	0.141348
2272	mask_01623-05-015_123,png	0.039801	0.00173566	1.22963	0.0539964
2273	mask_01623-05-015_125,png	0.0820896	0.00667338	1.17613	0.104053
2274	mask_01623-05-015_126,png	0.108203	0.0101382	1.12332	0.125569
2275	mask_01623-05-015_127,png	0.120626	0.012741	1.15819	0.143385
2276	mask_01623-05-015_128,png	0.106965	0.0114797	1.26769	0.14103
2277	mask_01623-05-015_129,png	0.121671	0.0167294	1.37534	0.172638
2278	mask_01623-05-015_13,png	0.0952863	0.00762612	1.07084	0.106411
2279	mask_01623-05-015_130,png	0.126866	0.0162329	1.29664	0.168798
2280	mask_01623-05-015_131,png	0.0895522	0.00901319	1.38657	0.130751
2281	mask_01623-05-015_132,png	0.0870647	0.0086999	1.44889	0.128753
2282	mask_01623-05-015_133,png	0.068182	0.00480831	1.31191	0.0923264
2283	mask_01623-05-015_134,png	0.136816	0.0170646	1.12954	0.15975
2284	mask_01623-05-015_135,png	0.0929759	0.00950428	1.37181	0.131115
2285	mask_01623-05-015_137,png	0.137596	0.01588	1.01045	0.164069
2286	mask_01623-05-015_138,png	0.0746269	0.00523357	1.20954	0.0943406
2287	mask_01623-05-015_139,png	0.10415	0.00975893	1.16458	0.129445
2288	mask_01623-05-015_14,png	0.0970149	0.00808001	1.04447	0.106827
2289	mask_01623-05-015_140,png	0.10398	0.0119376	1.52401	0.156716
2290	mask_01623-05-015_141,png	0.051312	0.00258305	1.26634	0.0663012
2291	mask_01623-05-015_142,png	0.0820896	0.005806	1.00971	0.0931497
2292	mask_01623-05-015_143,png	0.0828581	0.00736116	1.37752	0.117397
2293	mask_01623-05-015_144,png	0.174957	0.0464271	1.8957	0.326805
2294	mask_01623-05-015_145,png	0.0841766	0.00625688	1.04082	0.0986998
2295	mask_01623-05-015_146,png	0.137965	0.0169808	1.19249	0.167816
2299	mask_01623-05-015_15,png	0.0895447	0.00672622	1.1118	0.101294
2309	mask_01623-05-015_16,png	0.141288	0.0190777	1.27311	0.180861
2319	mask_01623-05-015_17,png	0.120271	0.0126041	1.07096	0.133727
2328	mask_01623-05-015_18,png	0.158609	0.0218269	1.13343	0.18488
2339	mask_01623-05-015_19,png	0.0870647	0.00634481	1.03404	0.0951782
2348	mask_01623-05-015_2,png	0.114428	0.0116105	1.05556	0.127708
2349	mask_01623-05-015_20,png	0.0895522	0.00866445	1.26371	0.120517
2353	mask_01623-05-015_21,png	0.0864914	0.00669099	1.17679	0.104251
2354	mask_01623-05-015_22,png	0.0945274	0.00797975	1.0559	0.106827
2355	mask_01623-05-015_24,png	0.134209	0.0158262	1.07121	0.149334
2356	mask_01623-05-015_25,png	0.135743	0.0162987	1.18704	0.163244
2357	mask_01623-05-015_26,png	0.121536	0.0135216	1.2095	0.149214
2358	mask_01623-05-015_27,png	0.181476	0.0294263	1.17034	0.216012
2359	mask_01623-05-015_28,png	0.11194	0.0108026	1.05858	0.123442
2360	mask_01623-05-015_29,png	0.119912	0.0116997	1.01857	0.126584
2361	mask_01623-05-015_3,png	0.0917683	0.00801513	1.20718	0.11383
2362	mask_01623-05-015_30,png	0.120352	0.0138914	1.29108	0.159015
2363	mask_01623-05-015_31,png	0.12795	0.0176513	1.37583	0.178667
2364	mask_01623-05-015_32,png	0.114428	0.0121041	1.19621	0.14103
2365	mask_01623-05-015_33,png	0.11194	0.0109867	1.09632	0.126866
2366	mask_01623-05-015_34,png	0.227209	0.0460633	1.18083	0.271245
2367	mask_01623-05-015_35,png	0.161781	0.0226684	1.1137	0.186825
2368	mask_01623-05-015_36,png	0.129672	0.0149777	1.10913	0.149674
2369	mask_01623-05-015_38,png	0.149254	0.0198215	1.11902	0.172498
2370	mask_01623-05-015_39,png	0.0696517	0.00470362	1.13955	0.0841963
2371	mask_01623-05-015_4,png	0.0970453	0.00950428	1.27912	0.127451
2372	mask_01623-05-015_40,png	0.207271	0.0405915	1.20365	0.260122
2373	mask_01623-05-015_41,png	0.165899	0.0261468	1.28988	0.216012
2374	mask_01623-05-015_42,png	0.0940349	0.0081213	1.16885	0.114142
2375	mask_01623-05-015_43,png	0.129835	0.013784	1.02644	0.14103
2376	mask_01623-05-015_44,png	0.0920398	0.00836916	1.19611	0.114687
2377	mask_01623-05-015_45,png	0.119912	0.01379	1.23956	0.151662
2378	mask_01623-05-015_46,png	0.065986	0.00390352	1.14523	0.0778274
2379	mask_01623-05-015_47,png	0.131478	0.0154915	1.19087	0.157632
2380	mask_01623-05-015_48,png	0.106965	0.00977077	1.04689	0.11883
2381	mask_01623-05-015_49,png	0.133789	0.0182265	1.26234	0.173801
2382	mask_01623-05-015_5,png	0.119403	0.0126398	1.11063	0.137512
2383	mask_01623-05-015_50,png	0.0845771	0.00587036	1.02055	0.0902371
2384	mask_01623-05-015_51,png	0.11194	0.0107492	1.13136	0.128359
2385	mask_01623-05-015_52,png	0.128521	0.0150195	1.17724	0.15245
2386	mask_01623-05-015_53,png	0.188771	0.03768	1.595	0.282389
2387	mask_01623-05-015_54,png	0.0970453	0.00946284	1.22139	0.12308
2388	mask_01623-05-015_55,png	0.0895522	0.00730819	1.11246	0.107736
2389	mask_01623-05-015_57,png	0.188288	0.0396591	1.43678	0.275072
2390	mask_01623-05-015_58,png	0.0970149	0.00776163	1.03229	0.106411
2391	mask_01623-05-015_59,png	0.0920398	0.00730231	1.06079	0.105154
2392	mask_01623-05-015_6,png	0.100563	0.00908415	1.14343	0.117901
2393	mask_01623-05-015_60,png	0.0920398	0.00743179	1.11546	0.105519
2394	mask_01623-05-015_61,png	0.0660872	0.00428559	1.26512	0.0854709
2395	mask_01623-05-015_62,png	0.130387	0.014309	1.09433	0.15087
2396	mask_01623-05-015_63,png	0.151179	0.0207758	1.21783	0.184766
2397	mask_01623-05-015_64,png	0.106915	0.0101085	1.13864	0.12476
2398	mask_01623-05-015_65,png	0.059529	0.00311458	1.13724	0.0688598
2399	mask_01623-05-015_66,png	0.0829735	0.00694359	1.31231	0.111064
2400	mask_01623-05-015_67,png	0.0920398	0.00721406	1.01393	0.104053
2401	mask_01623-05-015_68,png	0.162127	0.0262974	1.26045	0.205176
2402	mask_01623-05-015_69,png	0.0812145	0.00571243	1.08808	0.0925805
2403	mask_01623-05-015_7,png	0.136816	0.0151211	1.02412	0.144279
2404	mask_01623-05-015_70,png	0.194423	0.0368451	1.24029	0.246564
2405	mask_01623-05-015_71,png	0.0597015	0.00329254	1.15608	0.0713326
2406	mask_01623-05-015_72,png	0.0804817	0.00597571	1.22678	0.0985505
2407	mask_01623-05-015_73,png	0.144279	0.0202715	1.2683	0.18689
2408	mask_01623-05-015_74,png	0.0900094	0.00829243	1.2238	0.115921
2409	mask_01623-05-015_75,png	0.118408	0.0120268	1.11206	0.135853
2410	mask_01623-05-015_76,png	0.0998614	0.00930304	1.20407	0.121793
2411	mask_01623-05-015_77,png	0.109116	0.0110045	1.19502	0.133258
2412	mask_01623-05-015_78,png	0.0970149	0.0081449	1.07144	0.108693
2413	mask_01623-05-015_79,png	0.0731748	0.0052394	1.20955	0.0945274
2414	mask_01623-05-015_8,png	0.106965	0.0100967	1.07495	0.121132
2415	mask_01623-05-015_80,png	0.0870647	0.00663816	1.10074	0.100856
2416	mask_01623-05-015_81,png	0.0794555	0.00553126	1.15896	0.0957635
2417	mask_01623-05-015_82,png	0.0721393	0.00470944	1.13784	0.0855735
2418	mask_01623-05-015_83,png	0.112876	0.0115273	1.20387	0.139924
2419	mask_01623-05-015_84,png	0.0882629	0.00810361	1.27674	0.11661
2420	mask_01623-05-015_85,png	0.0792068	0.00549621	1.16513	0.093055
2421	mask_01623-05-015_86,png	0.196965	0.0330789	1.0798	0.220421
2422	mask_01623-05-015_87,png	0.0741786	0.00448284	1.05364	0.0812683
2423	mask_01623-05-015_88,png	0.116842	0.0117592	1.07585	0.130477
2424	mask_01623-05-015_89,png	0.176732	0.0307599	1.26496	0.226729
2425	mask_01623-05-015_9,png	0.0870647	0.0069671	1.13573	0.102423
2426	mask_01623-05-015_90,png	0.155091	0.0215806	1.18251	0.189707
2427	mask_01623-05-015_91,png	0.11194	0.010405	1.02105	0.120023
2428	mask_01623-05-015_92,png	0.164179	0.0291307	1.41009	0.230661
2429	mask_01623-05-015_93,png	0.11194	0.0110282	1.10936	0.128359
2430	mask_01623-05-015_94,png	0.0671642	0.0045351	1.17935	0.0841963
2431	mask_01623-05-015_95,png	0.141983	0.0181186	1.10643	0.165872
2432	mask_01623-05-015_96,png	0.118153	0.0141598	1.21124	0.15087
2433	mask_01623-05-015_97,png	0.155962	0.0220012	1.22076	0.199338
2434	mask_01623-05-015_98,png	0.169154	0.0245271	1.01743	0.191731
2435	mask_01623-05-015_99,png	0.10199	0.00953388	1.22508	0.126466
2436	mask_01623-05-016_0,png	0.126866	0.0145418	1.07361	0.144362
2437	mask_01623-05-016_1,png	0.220086	0.0442689	1.22868	0.27537
2438	mask_01623-05-016_10,png	0.104478	0.00980039	1.17738	0.125616
2439	mask_01623-05-016_100,png	0.158178	0.0256168	1.316	0.212242
2440	mask_01623-05-016_101,png	0.091568	0.0079031	1.19873	0.11448
2441	mask_01623-05-016_102,png	0.169154	0.0230712	1.06356	0.182271
2442	mask_01623-05-016_103,png	0.114428	0.0129436	1.21415	0.146583
2443	mask_01623-05-016_104,png	0.20899	0.0464938	1.32939	0.28385
2444	mask_01623-05-016_105,png	0.154229	0.0222777	1.21515	0.190833
2445	mask_01623-05-016_106,png	0.121891	0.0125386	1.03591	0.132225
2446	mask_01623-05-016_107,png	0.0920398	0.00907824	1.27579	0.123249
2447	mask_01623-05-016_108,png	0.146004	0.0198515	1.1037	0.171221
2448	mask_01623-05-016_109,png	0.191357	0.0358653	1.30713	0.248963
2449	mask_01623-05-016_11,png	0.126866	0.0150494	1.12343	0.150234
2450	mask_01623-05-016_110,png	0.115964	0.0138019	1.28292	0.157347
2451	mask_01623-05-016_111,png	0.10516	0.00917288	1.02271	0.115357
2452	mask_01623-05-016_112,png	0.0621891	0.00326381	1.03554	0.0675492
2453	mask_01623-05-016_113,png	0.104478	0.0117948	1.27724	0.139239
2454	mask_01623-05-016_114,png	0.0845771	0.00619241	1.07706	0.0965284
2455	mask_01623-05-016_115,png	0.116915	0.0118662	1.08276	0.137317
2456	mask_01623-05-016_116,png	0.0970149	0.00999593	1.31974	0.131909
2457	mask_01623-05-016_117,png	0.0746269	0.00525106	1.12819	0.0886643
2458	mask_01623-05-016_118,png	0.0945274	0.00831013	1.16356	0.115254
2459	mask_01623-05-016_12,png	0.183235	0.0295228	1.15243	0.214903
2460	mask_01623-05-016_120,png	0.0945274	0.00774985	1.14022	0.112968
2461	mask_01623-05-016_121,png	0.0746269	0.0048665	1.10783	0.0875675
2462	mask_01623-05-016_122,png	0.0895522	0.00759667	1.144	0.108475
2463	mask_01623-05-016_123,png	0.117499	0.0124672	1.13153	0.135412
2464	mask_01623-05-016_124,png	0.142172	0.0172621	1.13628	0.164252
2465	mask_01623-05-016_126,png	0.0917683	0.007526	1.14451	0.107654
2466	mask_01623-05-016_127,png	0.0995025	0.00963455	1.22213	0.123538
2467	mask_01623-05-016_128,png	0.0906974	0.00770271	1.16241	0.108938
2468	mask_01623-05-016_129,png	0.0970149	0.00922612	1.23653	0.123442
2469	mask_01623-05-016_13,png	0.0895522	0.00767914	1.10515	0.105966
2470	mask_01623-05-016_130,png	0.0669157	0.00381107	1.09644	0.0746657
2471	mask_01623-05-016_131,png	0.166667	0.0269481	1.15861	0.202911
2472	mask_01623-05-016_132,png	0.154229	0.021875	1.1983	0.188224
2473	mask_01623-05-016_133,png	0.0970453	0.00790899	1.02917	0.107846
2474	mask_01623-05-016_134,png	0.0969858	0.0100552	1.35556	0.134439
2475	mask_01623-05-016_135,png	0.0572139	0.0030286	1.22862	0.0705583
2476	mask_01623-05-016_136,png	0.0845771	0.00762023	1.45925	0.124879
2477	mask_01623-05-016_137,png	0.129353	0.0184901	1.34613	0.179926
2478	mask_01623-05-016_138,png	0.0597015	0.0030286	1.10403	0.0668202
2479	mask_01623-05-016_139,png	0.0882504	0.00727877	1.18231	0.110046
2480	mask_01623-05-016_14,png	0.114428	0.0107967	1.06822	0.126372
2481	mask_01623-05-016_140,png	0.116893	0.0120327	1.14761	0.13827
2482	mask_01623-05-016_141,png	0.114428	0.0142255	1.32425	0.157347
2483	mask_01623-05-016_142,png	0.124378	0.0129674	1.09857	0.140669
2484	mask_01623-05-016_143,png	0.0945274	0.00776753	1.06664	0.110261
2485	mask_01623-05-016_144,png	0.0741786	0.00557216	1.21902	0.097469
2486	mask_01623-05-016_145,png	0.134328	0.0170406	1.25671	0.170799
2487	mask_01623-05-016_147,png	0.057737	0.00307444	1.17272	0.0709669
2488	mask_01623-05-016_148,png	0.0737368	0.00463387	1.08919	0.0833596
2489	mask_01623-05-016_149,png	0.0550484	0.00296561	1.28453	0.0722996
2490	mask_01623-05-016_15,png	0.174129	0.0273579	1.11645	0.199943
2491	mask_01623-05-016_150,png	0.121891	0.0138436	1.17964	0.145291
2492	mask_01623-05-016_152,png	0.0771144	0.00585866	1.20741	0.0982212
2499	mask_01623-05-016_16,png	0.0696517	0.00430878	1.06769	0.0800398
2510	mask_01623-05-016_17,png	0.10199	0.0112599	1.38973	0.142946
2519	mask_01623-05-016_18,png	0.179925	0.0279125	1.07581	0.200591
2528	mask_01623-05-016_19,png	0.102322	0.00919654	1.10399	0.11546
2537	mask_01623-05-016_2,png	0.0706607	0.00477341	1.19991	0.087601
2538	mask_01623-05-016_20,png	0.109453	0.012235	1.24431	0.143051
2548	mask_01623-05-016_21,png	0.103606	0.00994259	1.14999	0.124043
2558	mask_01623-05-016_22,png	0.0721393	0.00448284	1.11955	0.0840921
2567	mask_01623-05-016_23,png	0.124818	0.0145299	1.14694	0.146848
2576	mask_01623-05-016_24,png	0.124084	0.0154616	1.30137	0.161988
2586	mask_01623-05-016_25,png	0.0906974	0.00684957	1.07663	0.0991762
2588	mask_01623-05-016_26,png	0.13873	0.0226443	1.46761	0.206292
2589	mask_01623-05-016_27,png	0.079602	0.00592303	1.13975	0.0963148
2590	mask_01623-05-016_28,png	0.114428	0.0120149	1.1226	0.135081
2591	mask_01623-05-016_29,png	0.0826454	0.00591717	1.17293	0.0981012
2592	mask_01623-05-016_3,png	0.0845771	0.00606939	1.06584	0.0930235
2593	mask_01623-05-016_30,png	0.0920398	0.00981816	1.43301	0.13455
2594	mask_01623-05-016_31,png	0.185244	0.0334474	1.25757	0.240299
2595	mask_01623-05-016_32,png	0.114428	0.012884	1.19038	0.140669
2596	mask_01623-05-016_33,png	0.106965	0.0114679	1.26961	0.138981
2597	mask_01623-05-016_34,png	0.0621891	0.00348236	1.08846	0.0716563
2598	mask_01623-05-016_35,png	0.0636248	0.00329254	1.07358	0.0696932
2599	mask_01623-05-016_36,png	0.123332	0.0133249	1.12469	0.141474
2600	mask_01623-05-016_37,png	0.137532	0.0195275	1.37615	0.191605
2601	mask_01623-05-016_38,png	0.139303	0.017849	1.24396	0.175523
2602	mask_01623-05-016_39,png	0.085488	0.00702	1.26923	0.108938
2603	mask_01623-05-016_4,png	0.0813756	0.00656185	1.22405	0.103141
2604	mask_01623-05-016_40,png	0.116915	0.0114619	1.0061	0.128984
2605	mask_01623-05-016_41,png	0.187717	0.0295409	1.10675	0.209273
2606	mask_01623-05-016_42,png	0.149254	0.0223558	1.18402	0.186325
2607	mask_01623-05-016_43,png	0.0987284	0.0081862	1.0862	0.111834
2608	mask_01623-05-016_44,png	0.0920398	0.00791489	1.08337	0.111622
2609	mask_01623-05-016_45,png	0.135743	0.017316	1.14063	0.163391
2610	mask_01623-05-016_46,png	0.0820896	0.00727289	1.32415	0.113282
2611	mask_01623-05-016_47,png	0.0895522	0.0099663	1.54769	0.14432
2612	mask_01623-05-016_48,png	0.0945274	0.00769092	1.04805	0.105435
2613	mask_01623-05-016_49,png	0.0596394	0.00389196	1.37801	0.0832545
2614	mask_01623-05-016_5,png	0.124378	0.0138794	1.04211	0.137946
2615	mask_01623-05-016_50,png	0.0721393	0.00586451	1.30399	0.101294
2616	mask_01623-05-016_51,png	0.113002	0.011248	1.13519	0.132022
2617	mask_01623-05-016_52,png	0.114428	0.0109688	1.05746	0.126466
2618	mask_01623-05-016_53,png	0.0701088	0.00429139	1.12644	0.0812683
2619	mask_01623-05-016_54,png	0.0696517	0.00463387	1.18806	0.0858124
2620	mask_01623-05-016_55,png	0.160368	0.0228608	1.14631	0.189134
2621	mask_01623-05-016_56,png	0.0597015	0.003149	1.1335	0.0698588
2622	mask_01623-05-016_57,png	0.10584	0.0104288	1.19501	0.130363
2623	mask_01623-05-016_58,png	0.0646766	0.00369562	1.1527	0.0765092
2624	mask_01623-05-016_59,png	0.156716	0.0219111	1.14502	0.184472
2625	mask_01623-05-016_6,png	0.124072	0.0137124	1.19274	0.148892
2626	mask_01623-05-016_60,png	0.0845771	0.00595814	1.05154	0.0920398
2627	mask_01623-05-016_61,png	0.096912	0.0086231	1.15593	0.115588
2628	mask_01623-05-016_62,png	0.0970149	0.00829243	1.13901	0.114246
2629	mask_01623-05-016_63,png	0.10584	0.00977077	1.13097	0.121988
2630	mask_01623-05-016_64,png	0.100563	0.00856403	1.07052	0.110984
2631	mask_01623-05-016_65,png	0.120775	0.0132474	1.11855	0.141348
2632	mask_01623-05-016_66,png	0.10199	0.00990111	1.18251	0.124879
2633	mask_01623-05-016_67,png	0.0646766	0.00399025	1.24307	0.0833596
2634	mask_01623-05-016_68,png	0.124378	0.0149956	1.27781	0.160966
2635	mask_01623-05-016_69,png	0.125184	0.0150315	1.25616	0.160218
2636	mask_01623-05-016_7,png	0.0794555	0.00522773	1.06125	0.0879013
2637	mask_01623-05-016_70,png	0.0721393	0.00448284	1.0677	0.0809449
2638	mask_01623-05-016_71,png	0.0845771	0.00680845	1.15673	0.10294
2639	mask_01623-05-016_72,png	0.156716	0.0220613	1.17127	0.187405
2640	mask_01623-05-016_73,png	0.115527	0.0129257	1.1918	0.141348
2641	mask_01623-05-016_74,png	0.141443	0.0164901	1.08695	0.153995
2642	mask_01623-05-016_75,png	0.0771144	0.00490725	1.06413	0.0855735
2643	mask_01623-05-016_76,png	0.0957253	0.0141837	1.95232	0.188544
2644	mask_01623-05-016_77,png	0.151741	0.0197375	1.07277	0.170588
2645	mask_01623-05-016_78,png	0.159204	0.0226684	1.10666	0.187003
2646	mask_01623-05-016_79,png	0.109053	0.0113847	1.18535	0.131909
2647	mask_01623-05-016_8,png	0.100563	0.00861128	1.06064	0.111967
2648	mask_01623-05-016_80,png	0.0746269	0.00603425	1.28576	0.102192
2649	mask_01623-05-016_82,png	0.0768154	0.00645037	1.41407	0.110046
2650	mask_01623-05-016_83,png	0.135743	0.0150912	1.06844	0.146848
2651	mask_01623-05-016_84,png	0.181592	0.0281718	1.12257	0.208912
2652	mask_01623-05-016_85,png	0.119912	0.0135813	1.22397	0.147924
2653	mask_01623-05-016_86,png	0.0618658	0.00357453	1.22936	0.0777153
2654	mask_01623-05-016_87,png	0.154229	0.0247137	1.27555	0.202569
2655	mask_01623-05-016_88,png	0.10284	0.0103101	1.23642	0.131297
2656	mask_01623-05-016_89,png	0.0892162	0.00783236	1.29133	0.117017
2657	mask_01623-05-016_9,png	0.0884725	0.00778521	1.22982	0.110743
2658	mask_01623-05-016_90,png	0.0721393	0.00434938	1.0693	0.0800398
2659	mask_01623-05-016_91,png	0.0646766	0.00450026	1.28656	0.0887964
2660	mask_01623-05-016_92,png	0.039801	0.00149034	1.11016	0.0475001
2661	mask_01623-05-016_93,png	0.117011	0.0129614	1.16296	0.146664
2662	mask_01623-05-016_94,png	0.136816	0.0170825	1.20512	0.169172
2663	mask_01623-05-016_95,png	0.079602	0.0058411	1.12836	0.0960395
2664	mask_01623-05-016_96,png	0.0945274	0.00744946	1.02999	0.102797
2665	mask_01623-05-016_97,png	0.0730865	0.00456995	1.06828	0.0820896
2666	mask_01623-05-016_98,png	0.0679479	0.00464549	1.34284	0.0936842
2667	mask_01623-05-016_99,png	0.151573	0.0214905	1.2112	0.192735
1: 1	visualization_01623-05-001.jpg	0.0995	0.01012	1.1108	0.12143
2: 2	visualization_01623-05-001.jpg	0.07513	0.00634	1.3998	0.10682
3: 2		0.07574	0.00688	1.6332	0.12105
4: 2		0.10697	0.01023	1.1269	0.12343
5: 3	visualization_01623-05-001.jpg	0.07213	0.00538	1.0939	0.08793
6: 3		0.08706	0.00692	1.1787	0.10697
7: 3		0.09365	0.00862	1.2349	0.11908
8: 3		0.15174	0.02226	1.1284	0.18159
9: 4	visualization_01623-05-001.jpg	0.0897	0.00943	1.3916	0.12833
10: 4		0.12634	0.02332	1.6445	0.21582
11: 4		0.06985	0.00516	1.3019	0.09176
12: 4		0.11926	0.01313	1.1977	0.14563
13: 4		0.08911	0.00861	1.3184	0.12042
14: 4		0.10823	0.0111	1.2678	0.13855
15: 5	visualization_01623-05-001.jpg	0.1449	0.01967	1.087	0.17699
16: 6	visualization_01623-05-001.jpg	0.20564	0.03831	1.0733	0.23871
17: 6		0.09661	0.01033	1.3446	0.133
18: 6		0.08209	0.00646	1.1629	0.1015
19: 6		0.13184	0.0159	1.1313	0.15424
20: 6		0.11853	0.01331	1.1773	0.14282
21: 6		0.11786	0.01339	1.2105	0.14775
22: 6		0.14677	0.01913	1.0853	0.1644
23: 7	visualization_01623-05-001.jpg	0.11725	0.01345	1.2366	0.14627
24: 7		0.07035	0.00464	1.2158	0.08416
25: 7		0.16879	0.02565	1.0911	0.20215
26: 7		0.06506	0.00435	1.2675	0.08276
27: 8	visualization_01623-05-001.jpg	0.12438	0.0172	1.2829	0.16455
28: 9	visualization_01623-05-001.jpg	0.0995	0.00866	1.0946	0.1134
29: 9		0.0597	0.0034	1.1359	0.06933
30: 9		0.0995	0.01174	1.4903	0.14828
31: 9		0.08117	0.00867	1.6499	0.13025
32: 9		0.11868	0.01341	1.1585	0.13854
33: 9		0.07915	0.0054	1.0437	0.08685
34: 9		0.10697	0.00975	1.0505	0.11464
35: 9		0.14927	0.02534	1.3667	0.2083
36: 9		0.14899	0.02074	1.1463	0.17682
37: 10	visualization_01623-05-002.jpg	0.04975	0.00241	1.1686	0.06071
38: 10		0.06762	0.00464	1.2889	0.08821
39: 10		0.17952	0.0298	1.1303	0.20776
40: 10		0.10697	0.01628	1.847	0.20199
41: 11	visualization_01623-05-002.jpg	0.08344	0.00982	1.6733	0.14018
42: 12	visualization_01623-05-002.jpg	0.17856	0.03381	1.2204	0.22772
43: 12		0.08392	0.00784	1.3469	0.11267
44: 12		0.09179	0.00992	1.4251	0.13177
45: 12		0.05627	0.00398	1.4741	0.08624
46: 12		0.10242	0.01228	1.4053	0.1449
47: 12		0.06716	0.00472	1.218	0.08514
48: 13	visualization_01623-05-002.jpg	0.04571	0.00264	1.4734	0.06829
49: 14	visualization_01623-05-002.jpg	0.05453	0.00342	1.3333	0.07458
50: 15	visualization_01623-05-002.jpg	0.11692	0.01249	1.1235	0.13721
51: 15		0.13281	0.02325	1.5512	0.20929
52: 16	visualization_01623-05-002.jpg	0.05693	0.00362	1.4374	0.08227
53: 16		0.20473	0.03861	1.1305	0.2373
54: 16		0.12314	0.01502	1.2443	0.15662
55: 16		0.1781	0.02782	1.0704	0.2015
56: 17	visualization_01623-05-002.jpg	0.15598	0.02282	1.1383	0.1825
57: 18	visualization_01623-05-002.jpg	0.06233	0.00495	1.5388	0.09567
58: 19	visualization_01623-05-002.jpg	0.08457	0.0069	1.2214	0.10624
59: 20	visualization_01623-05-002.jpg	0.12492	0.01517	1.1767	0.15063
60: 21	visualization_01623-05-002.jpg	0.07213	0.00512	1.1822	0.0863
61: 22	visualization_01623-05-002.jpg	0.04975	0.00287	1.3694	0.07116
62: 23	visualization_01623-05-002.jpg	0.10907	0.01117	1.1627	0.13367
63: 24	visualization_01623-05-003.jpg	0.09556	0.00801	1.0434	0.10389
64: 24		0.10026	0.0094	1.1413	0.12033
65: 24		0.12687	0.01618	1.2127	0.1566
66: 25	visualization_01623-05-003.jpg	0.11839	0.01538	1.3516	0.16119
67: 26	visualization_01623-05-003.jpg	0.14488	0.02184	1.3217	0.19531
68: 26		0.06317	0.00364	1.0995	0.07037
69: 26		0.03869	0.00146	1.1026	0.04447
70: 27	visualization_01623-05-003.jpg	0.09147	0.00758	1.1355	0.10626
71: 27		0.13681	0.01717	1.1382	0.15819
72: 27		0.07213	0.00537	1.1388	0.08683
73: 28	visualization_01623-05-003.jpg	0.08444	0.01187	1.9202	0.16154
74: 29	visualization_01623-05-003.jpg	0.11692	0.01291	1.1834	0.14034
75: 30	visualization_01623-05-003.jpg	0.12973	0.01446	1.0701	0.14246
76: 31	visualization_01623-05-003.jpg	0.20354	0.03785	1.0997	0.24207
77: 31		0.18159	0.03278	1.2535	0.22968
78: 31		0.05472	0.00304	1.1801	0.06906
79: 31		0.04046	0.00195	1.3986	0.05864
80: 32	visualization_01623-05-003.jpg	0.12438	0.01555	1.2516	0.15855
81: 32		0.10251	0.01141	1.3111	0.14034
82: 32		0.12994	0.01515	1.0748	0.14636
83: 32		0.10369	0.01053	1.2406	0.13477
84: 32		0.09674	0.00811	1.0631	0.1058
85: 33	visualization_01623-05-003.jpg	0.05371	0.00368	1.5481	0.08355
86: 33		0.07711	0.00563	1.1981	0.09606
87: 33		0.1376	0.01906	1.2601	0.17525
88: 33		0.14832	0.01985	1.0935	0.16821
89: 34	visualization_01623-05-003.jpg	0.08706	0.00716	1.094	0.10005
90: 34		0.05223	0.00294	1.2271	0.06586
91: 35	visualization_01623-05-003.jpg	0.12127	0.01402	1.2827	0.15601
92: 35		0.08548	0.00756	1.2934	0.11081
93: 35		0.09452	0.00787	1.0824	0.10556
94: 36	visualization_01623-05-003.jpg	0.08793	0.00792	1.2287	0.11041
95: 36		0.06018	0.00353	1.214	0.07315
96: 36		0.11353	0.01332	1.3022	0.14832
97: 37	visualization_01623-05-003.jpg	0.08093	0.0085	1.5947	0.13214
98: 37		0.16248	0.02701	1.3036	0.21252
99: 38	visualization_01623-05-003.jpg	0.10554	0.01009	1.1124	0.12129
100: 38		0.0686	0.00508	1.3162	0.09246
101: 38		0.11433	0.01181	1.1271	0.1348
102: 39	visualization_01623-05-004.jpg	0.14676	0.02316	1.3476	0.19531
103: 39		0.08443	0.01037	1.6979	0.14627
104: 40	visualization_01623-05-004.jpg	0.06759	0.0053	1.4768	0.09906
105: 40		0.08706	0.00703	1.0374	0.09942
106: 40		0.07385	0.00491	1.0823	0.08212
107: 40		0.12571	0.01391	1.1152	0.14245
108: 40		0.0517	0.00277	1.3277	0.06766
109: 40		0.11411	0.01298	1.2625	0.14349
110: 40		0.0469	0.00207	1.1554	0.05503
111: 40		0.09323	0.00818	1.2218	0.11826
112: 40		0.09204	0.00931	1.2639	0.12054
113: 41	visualization_01623-05-004.jpg	0.07788	0.00655	1.3606	0.1062
114: 41		0.10451	0.01151	1.2404	0.13123
115: 41		0.09317	0.00757	1.0617	0.10144
116: 42	visualization_01623-05-004.jpg	0.08606	0.00701	1.228	0.10645
117: 43	visualization_01623-05-004.jpg	0.11853	0.01391	1.2838	0.1532
118: 44	visualization_01623-05-005.jpg	0.19976	0.04017	1.2329	0.25293
119: 44		0.09967	0.01117	1.3822	0.14142
120: 44		0.0995	0.00904	1.095	0.11176
121: 44		0.09453	0.00831	1.1873	0.11246
122: 45	visualization_01623-05-005.jpg	0.06347	0.00586	1.8134	0.11624
123: 45		0.07855	0.00681	1.3047	0.10391
124: 45		0.12659	0.01541	1.1559	0.15465
125: 45		0.08888	0.00681	1.1382	0.10556
126: 45		0.07376	0.00553	1.2096	0.09233
127: 46	visualization_01623-05-005.jpg	0.08457	0.00732	1.2483	0.11316
128: 46		0.08021	0.00628	1.1665	0.09613
129: 46		0.07601	0.00655	1.3782	0.10486
130: 46		0.07711	0.00573	1.1994	0.09674
131: 46		0.0635	0.00423	1.333	0.08471
132: 46		0.17572	0.02685	1.1225	0.20837
133: 47	visualization_01623-05-005.jpg	0.05712	0.00447	1.6396	0.09594
134: 47		0.07583	0.00681	1.5366	0.1134
135: 47		0.07462	0.00637	1.256	0.09854
136: 47		0.1036	0.01019	1.0878	0.12378
137: 47		0.12935	0.01577	1.0908	0.14835
138: 47		0.09204	0.00928	1.2138	0.1181
139: 47		0.17761	0.03277	1.2279	0.22836
140: 47		0.02985	0.001	1.3237	0.04019
141: 48	visualization_01623-05-005.jpg	0.05728	0.00568	2.0655	0.11932
142: 48		0.10143	0.01206	1.3568	0.1391
143: 49	visualization_01623-05-006.jpg	0.08091	0.00704	1.2989	0.10771
144: 49		0.06467	0.00388	1.067	0.07244
145: 49		0.08267	0.007	1.3011	0.11258
146: 49		0.10202	0.00967	1.151	0.12054
147: 50	visualization_01623-05-006.jpg	0.09323	0.00834	1.1689	0.1132
148: 50		0.14677	0.01976	1.1432	0.17386
149: 50		0.15671	0.02186	1.0482	0.18198
150: 50		0.09701	0.00944	1.1836	0.11935
151: 50		0.12137	0.0142	1.2085	0.15039
152: 50		0.09033	0.00886	1.335	0.12076
153: 50		0.1221	0.01646	1.2968	0.16119
154: 50		0.07403	0.00498	1.1629	0.08898
155: 50		0.07913	0.00577	1.1189	0.09243
156: 51	visualization_01623-05-006.jpg	0.1759	0.03172	1.2704	0.22366
157: 51		0.11692	0.01439	1.3118	0.16006
158: 51		0.13682	0.01563	1.0346	0.1442
159: 51		0.06965	0.00442	1.0919	0.08035
160: 52	visualization_01623-05-006.jpg	0.07666	0.00654	1.406	0.10809
161: 52		0.11371	0.01511	1.4437	0.16589
162: 53	visualization_01623-05-006.jpg	0.15423	0.02182	1.0812	0.17589
163: 53		0.09701	0.00853	1.0939	0.11029
164: 53		0.09503	0.00846	1.1555	0.11465
165: 53		0.13895	0.02037	1.3955	0.19775
166: 54	visualization_01623-05-006.jpg	0.12488	0.01415	1.1023	0.14084
167: 54		0.15523	0.02181	1.1357	0.17929
168: 54		0.13682	0.01645	1.0662	0.15106
169: 54		0.12438	0.01301	1.0251	0.13177
170: 54		0.07214	0.00503	1.1462	0.08586
171: 54		0.14925	0.01998	1.0361	0.16696
172: 55	visualization_01623-05-006.jpg	0.0761	0.00573	1.2204	0.09414
173: 55		0.12687	0.01881	1.373	0.17847
174: 55		0.08457	0.00643	1.029	0.09228
175: 55		0.10252	0.0109	1.3319	0.14185
176: 56	visualization_01623-05-006.jpg	0.08618	0.00676	1.2134	0.10641
177: 56		0.0597	0.00302	1.0316	0.0629
178: 56		0.07769	0.00758	1.5391	0.1192
179: 56		0.06467	0.00408	1.1405	0.07576
180: 57	visualization_01623-05-007.jpg	0.17699	0.03265	1.2181	0.22252
181: 58	visualization_01623-05-007.jpg	0.06485	0.00504	1.4763	0.0959
182: 58		0.07885	0.00725	1.388	0.11081
183: 58		0.13151	0.0158	1.1906	0.16211
184: 58		0.0805	0.00857	1.6252	0.13092
185: 58		0.06332	0.00464	1.4215	0.09146
186: 58		0.04881	0.00233	1.2059	0.06008
187: 59	visualization_01623-05-007.jpg	0.11194	0.01148	1.1527	0.13124
188: 59		0.05101	0.00306	1.5257	0.078
189: 60	visualization_01623-05-007.jpg	0.10474	0.01186	1.3383	0.14212
190: 61	visualization_01623-05-007.jpg	0.08706	0.00686	1.1172	0.09934
191: 61		0.07462	0.00603	1.2578	0.10196
192: 61		0.10697	0.01056	1.1693	0.12842
193: 61		0.05472	0.00315	1.2351	0.06893
194: 61		0.11768	0.01265	1.1496	0.13855
195: 61		0.14179	0.02384	1.4366	0.21036
196: 61		0.06716	0.00428	1.1081	0.07806
197: 61		0.06965	0.00461	1.0766	0.08071
198: 62	visualization_01623-05-007.jpg	0.10309	0.00944	1.0993	0.11594
199: 62		0.06127	0.00374	1.2361	0.07623
200: 62		0.07022	0.00546	1.4152	0.09906
201: 62		0.0957	0.00808	1.0666	0.10461
202: 62		0.09452	0.00821	1.1219	0.11035
203: 63	visualization_01623-05-007.jpg	0.11108	0.0112	1.1099	0.12488
204: 63		0.12189	0.01535	1.2532	0.15611
205: 63		0.08343	0.00607	1.0523	0.09057
206: 63		0.1187	0.0154	1.3504	0.16003
207: 64	visualization_01623-05-007.jpg	0.1041	0.01061	1.1844	0.12622
208: 64		0.17178	0.02555	1.0856	0.19043
209: 65	visualization_01623-05-007.jpg	0.17106	0.02739	1.0982	0.20828
210: 65		0.07562	0.00511	1.1203	0.08485
211: 65		0.13544	0.02192	1.59	0.2146
212: 66	visualization_01623-05-007.jpg	0.11514	0.012	1.0808	0.12799
213: 67	visualization_01623-05-008.jpg	0.12801	0.01624	1.2186	0.15768
214: 67		0.07383	0.00465	1.0628	0.08036
215: 67		0.06555	0.00547	1.5893	0.10281
216: 67		0.13721	0.01692	1.0975	0.1532
217: 68	visualization_01623-05-008.jpg	0.22491	0.05144	1.3184	0.29753
218: 69	visualization_01623-05-008.jpg	0.18657	0.0329	1.2383	0.23194
219: 70	visualization_01623-05-008.jpg	0.07711	0.00522	1.0418	0.08279
220: 71	visualization_01623-05-008.jpg	0.12973	0.01454	1.0952	0.1432
221: 72	visualization_01623-05-008.jpg	0.04477	0.00209	1.1882	0.05587
222: 72		0.03694	0.00142	1.2284	0.04585
223: 72		0.16887	0.02847	1.197	0.20512
224: 72		0.1001	0.01071	1.4534	0.14293
225: 72		0.11081	0.01293	1.2668	0.14417
226: 72		0.04726	0.00254	1.3842	0.06695
227: 72		0.05373	0.00324	1.2789	0.0708
228: 72		0.08441	0.00754	1.227	0.10623
229: 73	visualization_01623-05-008.jpg	0.1088	0.01172	1.2356	0.13538
230: 73		0.08502	0.00675	1.1358	0.09854
231: 73		0.04975	0.00275	1.2821	0.06585
232: 73		0.06927	0.00444	1.0987	0.07957
233: 74	visualization_01623-05-008.jpg	0.15126	0.01986	1.1122	0.16968
234: 74		0.0995	0.00851	1.0225	0.10779
235: 74		0.07214	0.00478	1.1318	0.08348
236: 75	visualization_01623-05-008.jpg	0.07213	0.00495	1.0734	0.08172
237: 75		0.09452	0.00838	1.125	0.10938
238: 75		0.05452	0.00268	1.1381	0.06274
239: 75		0.12033	0.01469	1.246	0.15178
240: 75		0.08955	0.00744	1.1115	0.10463
241: 75		0.08209	0.00681	1.1793	0.10161
242: 75		0.10905	0.01198	1.227	0.13672
243: 75		0.11081	0.01086	1.1078	0.12488
244: 76	visualization_01623-05-008.jpg	0.11386	0.0136	1.3113	0.15228
245: 76		0.06218	0.00344	1.0447	0.06762
246: 76		0.11961	0.01294	1.1201	0.13843
247: 76		0.0545	0.00298	1.1509	0.06604
248: 76		0.10248	0.0114	1.2889	0.13442
249: 76		0.11078	0.01261	1.2667	0.14371
250: 77	visualization_01623-05-008.jpg	0.10834	0.01436	1.5648	0.1676
251: 78	visualization_01623-05-008.jpg	0.09326	0.00769	1.0987	0.1058
252: 79	visualization_01623-05-008.jpg	0.11692	0.01202	1.0429	0.12742
253: 80	visualization_01623-05-009.jpg	0.08706	0.00701	1.1319	0.09951
254: 80		0.06218	0.00371	1.1613	0.07519
255: 80		0.11443	0.01305	1.2035	0.14586
256: 81	visualization_01623-05-009.jpg	0.11435	0.01201	1.0716	0.1282
257: 81		0.08706	0.00847	1.3485	0.12099
258: 81		0.10312	0.01276	1.454	0.15259
259: 81		0.09452	0.0085	1.1779	0.11353
260: 81		0.13433	0.01641	1.1064	0.15662
261: 81		0.10258	0.01102	1.3547	0.14035
262: 82	visualization_01623-05-009.jpg	0.06218	0.00374	1.1189	0.07348
263: 82		0.04726	0.00206	1.0516	0.0534
264: 82		0.08349	0.00656	1.1974	0.1028
265: 83	visualization_01623-05-009.jpg	0.09107	0.00991	1.528	0.1405
266: 84	visualization_01623-05-009.jpg	0.06467	0.00503	1.3765	0.09512
267: 84		0.09204	0.0085	1.2518	0.11591
268: 84		0.08955	0.00786	1.1715	0.11177
269: 84		0.16915	0.02593	1.05	0.19823
270: 84		0.06716	0.00404	1.0676	0.07682
271: 84		0.04926	0.00244	1.2135	0.06141
272: 84		0.13075	0.01502	1.1103	0.14734
273: 84		0.13193	0.01862	1.3467	0.1803
274: 85	visualization_01623-05-010.jpg	0.07258	0.00511	1.1716	0.08691
275: 85		0.0897	0.00723	1.114	0.10162
276: 86	visualization_01623-05-010.jpg	0.07695	0.00603	1.2889	0.09933
277: 86		0.12665	0.01476	1.0829	0.14084
278: 87	visualization_01623-05-010.jpg	0.06716	0.0049	1.4095	0.09415
279: 87		0.09085	0.00781	1.1684	0.10764
280: 87		0.09002	0.00723	1.0995	0.10141
281: 87		0.0796	0.00642	1.2155	0.10066
282: 88	visualization_01623-05-010.jpg	0.15787	0.02363	1.1244	0.18353
283: 88		0.0686	0.00512	1.3155	0.09173
284: 88		0.1058	0.01122	1.2459	0.13074
285: 88		0.07711	0.00601	1.2818	0.10028
286: 88		0.06887	0.00478	1.2585	0.08726
287: 88		0.1794	0.03137	1.2312	0.22647
288: 88		0.0995	0.00918	1.1667	0.12006
289: 89	visualization_01623-05-010.jpg	0.07942	0.00665	1.3456	0.10677
290: 89		0.05453	0.00324	1.256	0.07104
291: 89		0.1077	0.01263	1.3885	0.151
292: 90	visualization_01623-05-010.jpg	0.06218	0.00365	1.1529	0.07345
293: 91	visualization_01623-05-010.jpg	0.11433	0.01225	1.1165	0.13538
294: 91		0.10199	0.01074	1.2249	0.12842
295: 91		0.0614	0.00496	1.6506	0.10071
296: 91		0.05472	0.00275	1.089	0.06146
297: 91		0.19879	0.03314	1.0377	0.21182
298: 92	visualization_01623-05-011.jpg	0.11692	0.01618	1.3536	0.16607
299: 92		0.10448	0.00949	1.0769	0.11597
300: 93	visualization_01623-05-011.jpg	0.06781	0.00584	1.4717	0.10161
301: 94	visualization_01623-05-011.jpg	0.09146	0.00761	1.1207	0.10463
302: 94		0.07462	0.00619	1.3483	0.10316
303: 94		0.05472	0.0037	1.4703	0.08195
304: 94		0.0597	0.00404	1.3536	0.08147
305: 94		0.1015	0.01167	1.4412	0.14703
306: 94		0.0686	0.00514	1.3451	0.09207
307: 94		0.1051	0.01659	1.7612	0.18539
308: 95	visualization_01623-05-011.jpg	0.16357	0.02556	1.1829	0.19904
309: 95		0.04975	0.00257	1.2276	0.06237
310: 95		0.07916	0.00543	1.06	0.08591
311: 96	visualization_01623-05-011.jpg	0.05952	0.00313	1.0973	0.06537
312: 96		0.11935	0.01593	1.4317	0.17102
313: 96		0.10697	0.01082	1.1752	0.12769
314: 97	visualization_01623-05-011.jpg	0.03869	0.00167	1.2798	0.05175
315: 98	visualization_01623-05-011.jpg	0.07055	0.00485	1.2016	0.08905
316: 98		0.08556	0.00714	1.2441	0.11176
[truncated: 273 more rows]

## Sheet: Precheza
Area	Perim.	Feret	FeretX	FeretY	FeretAngle	MinFeret
7402.2	312.504	104.667	1489.01	1090.79	104.744	93.23
5231.03	261.56	87.264	1467.7	1094.78	74.055	80.959
6866.5	299.795	99.533	1342.51	1108.1	77.638	89.234
25782.6	579.869	194.437	1479.69	852.386	150.45	166.758
10818.6	375.324	129.601	1375.8	933.629	67.652	109.212
9722.37	357.772	126.273	1346.5	996.226	37.716	99.827
27515.7	607.832	219.19	1194.67	1153.38	79.851	163.312
3334.8	211.102	71.388	1319.87	1217.31	75.964	61.705
12274.9	400.3	133.505	1425.08	1242.62	28.61	120.639
16643.9	475.047	171.85	1307.88	793.784	104.359	122.53
15267.4	451.389	161.769	1479.69	884.35	112.765	121.199
7519.27	314.101	109.868	1383.8	1022.86	96.263	89.802
6327.26	286.486	94.824	1148.06	729.855	119.445	86.57
6485.13	290.102	96.207	958.934	1012.21	21.949	87.584
5466.95	269.667	98.133	914.983	1198.67	82.2	71.92
5809.3	274.314	92.004	731.187	965.593	157.891	81.873
13066	427.341	148.846	664.594	1259.93	83.32	109.223
10437.2	368.575	121.14	917.646	856.381	104.647	111.638
7093.55	303.515	101.754	572.697	1126.75	14.4	91.399
3604.43	219.291	74.059	359.6	1109.43	142.306	63.148
4214.62	232.752	77.808	560.71	789.789	96.882	70.588
5268.28	266.479	90.898	631.298	891.009	79.019	77.247
16088.7	456.819	152.972	684.572	741.842	7.001	134.517
19508.6	513.152	184.109	442.175	883.018	160.123	144.983
20374.2	516.43	173.816	511.431	954.938	164.899	154.796
6481.58	290.326	98.557	420.865	789.789	108.925	81.933
9328.58	351.267	122.212	386.237	930.965	73.54	99.889
21207.9	529.74	185.242	250.388	945.615	153.066	147.836
4148.99	231.451	77.66	167.813	1094.78	59.036	69.104
8494.88	333.887	115.28	79.911	703.218	139.686	95.826
22600.4	559.133	207.978	133.185	673.917	124.301	134.213
16565.8	470.255	166.881	273.03	652.608	114.52	136.17
15139.7	447.051	155.119	578.024	759.156	23.263	126.431
28975.5	617.88	203.115	278.357	676.581	63.939	186.227
5262.96	266.323	96.041	704.55	446.171	109.44	70.462
12161.4	399.23	137.613	555.383	617.98	14.574	115.871
10029.2	361.922	120.604	728.523	520.754	149.47	106.159
7799.54	320.795	109.771	621.975	400.888	144.382	90.593
11487.3	386.419	125.731	558.046	362.264	126.384	119.781
7437.68	309.631	101.256	354.273	351.609	54.638	93.934
13780.9	424.901	143.129	194.45	346.282	5.339	127.205
21167.1	524.503	179.182	186.459	378.246	168.857	156.89
18453.2	497.299	177.676	107.88	269.034	127.385	146.846
5722.38	275.887	97.216	135.849	231.742	170.538	83.336
6925.04	301.968	101.754	279.689	197.114	52.98	88.482
9968.93	360.399	122.661	378.246	153.163	48.521	105.477
23607.9	559.962	195.22	522.086	322.308	48.042	160.361
22064.7	535.229	180.543	362.264	261.043	158.356	158.493
22378.7	557.627	206.227	466.148	215.76	35.538	145.829
20839	535.931	198.665	625.971	237.07	140.44	149.785
3072.28	202.39	68.029	872.364	285.016	156.949	57.103
3586.69	217.944	76.102	733.851	311.654	85.986	63.278
12766.3	406.206	136.637	752.497	335.627	43.025	125.181
6717.5	296.203	102.82	719.2	122.53	36.573	86.5
11235.4	388.224	133.743	796.448	114.539	45.807	108.612
3480.26	219.092	83.663	1219.98	171.809	103.815	53.94
8486.01	333.413	112.736	1094.78	207.769	51.234	97.991
6045.22	279.935	94.711	953.607	149.167	176.775	84.192
10300.6	366.277	128.612	930.965	34.628	121.88	105.762
14641.2	434.574	149.173	937.624	304.994	60.001	128.997
7792.44	320.617	111.24	871.032	463.485	73.301	93.23
3675.38	217.813	72.031	996.226	568.701	3.18	67.924
23909.5	616.785	249.753	1017.53	474.14	32.588	114.806
28748.5	623.112	218.623	1062.82	318.313	50.686	160.667
8384.9	328.557	111.343	1202.66	544.728	83.13	94.794
11347.2	386.679	130.881	1000.22	660.599	58.736	111.981
26190.6	593.528	208.387	1243.95	583.351	137.849	170.527
14724.6	462.911	187.867	1434.4	570.033	91.625	106.548
14275.8	429.243	144.731	1528.97	705.882	75.069	131.056
4684.69	245.74	82.058	1503.66	442.175	13.134	75.341
7003.09	302.712	110.23	1430.41	466.148	25.017	88.422
10391.1	369.717	127.594	1441.07	434.184	76.109	110.382
7953.86	325.722	114.586	1289.23	454.162	109.699	87.508
12239.4	405.873	146.534	1337.18	506.104	25.866	109.095
3760.52	221.17	76.671	1310.54	126.526	107.176	63.028
6715.73	304.768	113.708	1387.79	214.428	166.452	76.298
8395.55	333.436	113.301	1548.94	191.787	72.204	96.502
9789.78	364.156	127.531	1583.57	154.495	114.692	91.8
9238.11	349.744	118.002	1610.21	71.92	106.39	100.901
2238.57	170.287	56.584	1512.98	245.061	116.565	51.643
3810.19	222.908	74.548	1470.37	1172.03	71.241	66.865
3987.57	228.858	76.009	1584.9	910.987	78.887	68.456
7192.89	305.593	100.128	1620.87	796.448	118.61	93.551
10511.7	376.09	129.052	1578.24	990.898	58.935	106.6
14639.4	451.244	165.375	1515.65	771.143	120.489	118.241
8995.1	349.506	118.916	1277.25	705.882	105.593	98.557
20686.4	522.804	175.239	1230.63	961.598	70.463	151.045
21631.9	552.533	206.712	1090.79	1017.53	148.973	135.299
7169.83	307.046	100.843	957.602	1049.5	33.69	92.293
14360.9	432.359	146.049	1010.88	1089.45	80.022	128.593
20799.9	534.152	201.326	1350.5	940.288	71.086	143.784
4255.42	235.806	82.618	1342.51	1230.63	69.228	65.261
6898.43	297.561	100.411	860.377	1053.49	158.199	90.566
16000	454.49	152.612	920.31	1081.46	80.455	136.677
10226.1	370.057	131.179	942.952	793.784	48.705	101.71
10721	380.029	135.856	434.184	1057.49	142.568	106.346
44675.7	800.261	290.225	787.125	1026.86	77.813	193.048
23254.9	551.685	186.507	583.351	812.43	96.973	162.242
13408.4	416.747	145.044	235.738	1116.09	44.256	120.698
9028.8	341.085	115.072	298.335	876.359	106.128	102.905
17220.4	484.012	163.531	404.883	780.466	12.225	136.414
9731.24	359.196	122.834	426.193	889.678	80.64	101.864
9190.22	346.614	117.324	335.627	735.183	129.472	103.7
2245.67	172.499	59.338	749.833	649.944	80.961	49.279
11207.1	388.311	130.018	504.772	721.864	83.53	109.754
15171.6	449.741	161.835	202.442	741.842	76.192	125.194
38829.2	746.375	278.895	621.975	647.28	86.441	204.476
10309.5	370.261	124.177	300.999	372.919	128.468	103.926
3503.32	218.729	80.805	379.578	507.436	81.469	53.274
5972.49	281.229	97.453	374.251	560.71	86.082	78.411
5470.5	272.242	98.278	293.008	544.728	63.435	74.246
10016.8	360.508	120.192	191.787	504.772	77.196	108.944
6344.99	289.379	98.701	210.433	308.99	93.094	81.319
11506.8	386.764	127.913	237.07	406.215	31.373	114.947
18382.2	493.023	169.711	323.64	304.994	148.805	141.448
33273.5	658.434	217.239	130.522	492.785	87.892	201.241
22394.6	552.116	194.304	47.947	579.356	151.327	159.361
17390.6	495.599	188.846	165.15	563.374	168.611	126.36
28737.8	612.98	221.4	423.529	450.166	23.018	169.145
9316.16	351.656	122.509	773.806	443.507	78.079	103.197
2669.62	194.047	75.2	121.199	130.522	112.932	48.243
5548.55	273.401	95.188	251.72	245.061	72.072	78.579
6900.2	309.186	106.557	408.879	149.167	71.792	89.944
15652.3	472.029	165.413	446.171	245.061	166.971	116.651
12154.3	402.892	140.749	691.232	135.849	60.524	115.266
5378.26	264.465	86.979	793.784	153.163	168.518	81.243
10038.1	364.058	126.995	764.483	219.756	80.34	107.371
4312.18	238.893	80.31	936.292	394.228	84.289	71.481
3845.67	225.318	75.164	945.615	524.75	82.875	68.749
28548	686.002	280.085	848.39	641.953	81.523	146.038
10227.9	371.557	131.071	1093.45	339.622	115.263	97.638
13082	413.586	140.749	976.248	462.153	150.524	122.511
4894	252.589	86.979	1200	394.228	101.482	70.693
9365.83	349.308	118.893	1065.48	290.344	167.053	106.111
3242.56	206.377	71.077	1165.37	85.239	102.995	60.412
3838.57	222.077	75.717	1109.43	134.517	50.711	66.593
7529.91	320.611	119.125	1020.2	189.123	79.695	90.538
7902.42	320.545	108.405	1415.76	69.256	10.62	95.827
9835.9	358.795	120.339	1528.97	239.733	62.301	106.212
13704.6	422.269	146.195	1527.63	359.6	163.051	123.862
12241.2	404.668	143.197	1215.98	543.396	9.638	111.876
16748.5	468.906	155.736	1262.6	262.375	41.186	142.956
22153.4	547.682	199.973	1406.44	210.433	41.76	145.973
6242.11	284.97	98.997	1180.02	572.697	109.654	84.771
12420.4	407.34	138.211	1193.34	697.891	122.005	117.496
40862	731.726	242.126	600.666	863.041	5.366	215.009
26297.1	600.689	210.256	960.266	687.236	63.273	168.313
4429.26	241.93	83.44	1502.33	1138.73	8.259	73.457
13968.9	430.534	152.577	1522.31	1078.8	73.78	127.858
3127.26	201.483	67.44	1576.91	863.041	99.09	61.366
21243.4	523.67	176.354	1481.02	924.306	62.08	153.133
17504.2	479.2	168.468	1387.79	988.235	71.565	137.257
22029.2	534.96	187.37	1249.28	845.726	14.826	150.382
17899.7	494.038	177.257	1309.21	1084.13	82.661	122.086
20849.6	524.66	185.07	1349.17	1049.5	145.852	142.541
5954.75	285.567	100.773	1353.16	1214.65	60.725	79.125
12693.5	409.078	137.8	1042.84	974.916	20.362	123.895
8331.69	328.63	108.405	1170.7	725.86	137.49	99.408
13571.6	431.17	153.741	997.558	720.532	94.97	122.724
8386.68	330.386	112.169	815.094	993.562	47.406	100.769
8062.06	325.262	109.001	859.045	934.961	63.122	98.528
7148.54	305.317	105.073	1069.48	921.642	59.534	88.526
5670.94	275.364	94.176	977.58	1106.77	98.13	83.656
3411.08	210.107	70.096	977.58	960.266	104.3	65.261
10011.5	369.455	132.985	844.395	992.23	97.481	100.778
7460.73	311.406	101.431	693.895	1054.83	166.329	94.562
6462.07	305.151	114.825	741.842	1198.67	52.067	72.883
15875.8	457.419	150.499	655.272	984.239	82.372	134.416
4072.72	232.281	79.655	688.568	769.811	159.444	67.611
2009.75	162.997	55.188	672.586	715.205	160.253	48.972
6305.97	298.481	99.818	664.594	700.555	108.677	84.929
4352.98	242.486	85.415	547.391	787.125	79.216	67.281
2463.85	179.12	64.068	422.197	811.098	43.315	52.739
9837.67	361.164	124.946	406.215	885.682	54.107	101.652
29050	655.7	248.632	567.369	977.58	82.304	159.637
4301.54	243.654	87.254	442.175	941.62	58.736	63.585
18561.4	491.861	160.647	387.569	1207.99	78.038	149.74
14188.9	430.917	146.722	261.043	1102.77	105.803	127.138
16998.6	475.371	169.752	270.366	1121.42	63.435	132.026
29000.4	619.216	211.911	141.176	1110.77	75.44	172.342
6806.19	299.545	100.491	23.973	1168.04	145.257	88.173
11304.6	401.536	140.578	209.101	788.457	48.457	107.327
13644.3	428.023	151.082	250.388	544.728	99.13	121.07
11020.8	380.181	134.8	293.008	520.754	119.604	104.986
12195.1	399.383	131.793	412.874	733.851	14.036	123.037
6369.83	288.837	103.044	667.258	712.541	75.784	81.474
3781.81	223.018	75.81	277.025	439.511	108.435	66.867
9976.03	359.306	119.459	230.411	495.449	22.276	109.834
10398.2	366.622	124.768	300.999	474.14	73.887	110.798
10855.8	374.406	124.711	543.396	271.698	109.983	114.759
10229.7	364.422	118.288	530.077	442.175	7.765	111.653
16911.7	475.112	172.345	447.502	440.843	143.484	129.021
23936.1	561.299	200.58	539.4	615.316	52.826	161.111
11524.6	390.34	132.985	655.272	491.454	82.519	112.434
17197.3	473.885	158.977	157.159	488.79	148.707	139.956
3996.44	228.369	78.681	78.579	422.197	33.959	67.014
6440.78	287.655	97.444	114.539	491.454	68.344	86.98
4909.97	256.856	91.2	133.185	347.614	118.811	67.872
4874.49	252.039	87.071	183.796	201.11	96.147	73.718
10806.2	372.071	123.941	63.929	273.03	28.217	113.773
13630.1	440.405	161.813	439.511	201.11	98.997	100.021
3909.53	224.696	75.4	495.449	198.446	54.345	68.827
3020.84	198.565	70.525	728.523	214.428	100.886	58.369
13408.4	423.709	148.935	824.417	304.994	38.1	118.871
9562.73	355.15	122.008	888.346	307.658	126.119	100.939
16267.8	463.205	160.807	942.952	544.728	58.548	136.451
8384.9	329.659	108.601	1001.55	400.888	156.894	99.05
3677.15	218.874	75.81	1162.71	347.614	108.435	64.516
3017.29	198.376	69.461	1201.33	371.587	85.601	55.938
3473.16	211.868	71.834	1192.01	257.048	100.685	64.102
16785.8	483.483	178.712	1064.15	207.769	115.61	114.988
4906.42	253.269	85.114	1016.2	121.199	159.864	75.003
7549.43	317.183	109.212	938.956	243.729	167.32	90.145
7556.52	319.772	116.139	749.833	430.188	53.393	90.409
17154.7	479.124	177.342	872.364	576.692	165.651	131.681
2983.59	196.993	68.068	1213.32	298.335	59.421	58.286
9548.53	351.545	118.228	1245.28	237.07	14.349	106.597
16505.5	466.494	165.171	1309.21	242.397	142.206	131.688
19269.1	502.221	176.791	1298.56	154.495	149.184	141.331
18325.5	495.763	175.279	1138.73	135.849	163.217	130.522
14240.3	435.27	146.364	1501	399.556	7.319	123.129
13271.8	429.473	166.135	1323.86	343.618	138.9	105.026
11739.2	389.765	133.538	1330.52	554.051	51.072	116.331
18086	482.124	158.362	1257.27	395.56	108.13	149.331
15879.3	463.367	172.283	1422.42	450.166	109.415	114.919
20094	507.769	168.325	1290.57	574.029	105.136	147.406
10391.1	366.525	121.717	1097.45	692.563	23.199	113.779
12241.2	401.578	134.675	1142.73	542.064	171.469	120.127
17080.2	472.781	162.737	1419.76	675.249	172.003	143.431
3984.03	227.062	78.985	1536.96	635.294	84.193	66.234
9280.69	354.404	123.869	1610.21	820.421	53.746	99.2
31677.1	650.489	235.629	787.125	685.904	174.161	181.069
9727.69	353.36	118.893	737.846	43.951	99.673	107.253
13532.6	425.919	149.559	590.011	37.292	98.707	118.028
18337.9	488.854	165.343	691.232	86.57	92.77	136.518
6765.39	292.49	95.903	570.033	169.145	99.593	91.143
10957	377.883	129.32	487.458	185.128	57.619	114.602
5399.54	265.812	89.393	1592.9	964.261	24.656	79.092
16775.1	466.5	160.559	1302.55	871.032	20.389	140.586
11602.6	387.57	129.963	1349.17	1049.5	45	118.88
4260.74	242.671	94.477	1121.42	1004.22	49.574	63.098
16370.7	462.241	161.088	1082.8	988.235	57.492	134.672
18054.1	487.83	162.748	1105.44	982.907	158.895	146.26
18988.9	497.508	167.013	938.956	1038.85	57.704	148.257
6969.38	304.963	106.223	1028.19	1227.97	59.899	88.388
20599.5	522.607	183.873	1076.14	1038.85	141.47	144.644
9307.29	352.924	118.625	817.758	1233.3	61.133	98.699
10167.6	371.777	135.385	752.497	1211.99	74.597	97.697
6868.28	300.56	103.251	791.12	1084.13	59.797	87.259
8517.94	335.157	116.49	847.058	1022.86	59.036	94.589
14373.4	433.168	147.95	801.775	940.288	23.334	129.021
14671.4	442.644	160.144	849.722	1136.07	43.652	126.371
20585.3	525.806	189.97	620.643	1048.17	40.166	143.328
23325.9	551.523	189.615	595.338	1050.83	75.769	158.605
4714.84	247.069	84.455	546.06	861.709	37.954	75.061
12784	409.303	136.786	564.706	688.568	96.71	123.365
4507.31	241.31	81.494	378.246	1072.14	101.31	73.009
9270.04	354.365	125.682	287.68	1125.42	77.142	99.827
13663.8	430.808	153.579	374.251	1016.2	133.243	123.684
17646.1	479.432	158.977	314.317	1108.1	148.707	145.172
12241.2	411.079	143.667	187.791	1263.93	79.315	117.325
13012.8	415.433	144.511	197.114	1184.02	9.549	115.472
6566.72	293.223	98.242	155.827	1101.44	15.732	89.439
8869.16	339.527	110.864	332.963	761.82	16.04	103.885
32399	654.703	220.316	69.256	657.935	165.292	190.634
2761.86	191.832	69.218	274.362	555.383	30.018	56.121
8828.36	350.665	132.819	77.247	639.289	83.089	89.234
6683.8	295.755	99.453	740.51	579.356	20.376	90.16
9646.1	362.473	134.543	767.147	699.223	68.515	97.225
11783.6	395.271	132.33	491.454	514.095	40.101	115.637
10902	380.1	130.256	422.197	555.383	73.974	110.003
20088.6	520.795	175.688	700.555	443.507	19.946	144.129
30758.2	640.23	226.806	524.75	299.667	139.764	170.417
5706.42	279.401	99.453	772.475	267.702	110.376	72.882
9447.43	354.66	126.252	637.957	195.782	133.29	95.826
5734.8	275.613	93.058	532.741	211.765	9.058	82.815
17557.4	496.035	181.078	319.645	289.012	9.739	126.96
26712.1	604.535	209.232	298.335	419.534	31.464	160.015
13759.6	423.493	146.219	246.393	366.259	48.323	118.989
4528.59	242.52	82.747	43.951	159.822	123.179	70.583
4014.18	228.52	78.342	62.597	26.637	107.819	67.609
11778.2	401.04	129.977	161.154	129.19	45.83	120.861
26314.8	588.904	207.461	203.773	50.61	105.642	164.243
4017.73	228.359	78.861	435.516	125.194	85.156	66.593
3762.3	221.671	74.987	829.744	274.362	19.722	67.308
5839.45	283.143	102.032	970.921	258.379	54.028	76.665
2215.52	172.268	61.568	992.23	322.308	51.147	49.906
4285.58	237.26	82.371	843.063	452.83	104.036	67.034
27219.4	624.895	226.842	640.621	568.701	34.716	151.465
28961.3	625.106	224.862	1129.41	388.901	74.894	164.718
4549.88	244.628	84.086	1247.95	169.145	119.407	67.915
5887.35	278.275	96.52	1044.17	137.181	50.599	80.992
4627.93	243.219	83.44	1022.86	10.655	98.259	73.892
10520.6	375.08	129.895	989.567	173.141	74.539	105.961
8613.73	338.769	111.788	950.943	436.848	111.675	102.414
3717.95	218.735	73.975	1251.94	303.662	103.536	65.529
4010.63	229.312	79.298	1414.43	338.291	60.852	67.211
8938.34	343.732	113.645	1342.51	269.034	169.875	102.996
4257.2	235.484	80.31	1350.5	346.282	95.711	70.293
13286	435.328	147.307	1534.29	66.593	165.336	118.535
17756.1	499.723	175.122	1562.26	221.088	55.222	130.197
8234.13	331.282	114.825	1398.44	454.162	142.067	93.657
6320.16	284.785	94.346	1459.71	540.732	108.947	87.038
18190.6	519.85	181.22	1066.81	687.236	82.823	147.006
39698.3	736.492	269.301	1180.02	704.55	78.301	183.067
8397.32	332.407	109.601	1273.25	516.759	25.942	99.889
11570.7	392.771	132.685	1242.62	616.648	144.395	114.539
24225.2	584.066	215.916	966.925	797.78	68.658	136.925
6602.2	293.484	100.031	1030.85	787.125	3.053	84.759
5197.33	258.634	87.71	1089.45	752.497	41.923	77.166
18488.6	494.919	178.309	1401.11	741.842	13.829	133.979
11907.7	406.355	136.715	1563.6	704.55	47.764	116.311
8516.17	333.615	115.311	875.027	759.156	83.367	97.225
